# Supplementary material for: A direct approach for the expedient synthesis of unsymmetrical ethers by employing bromodimethylsulfonium bromide (BDMS) mediated C–S bond cleavage of naphthalene-2-ol sulfides
Source: Royal Society of Chemistry journal article supplement (doi:10.1039/c5ra14563e), 2015-01-01

## Supporting Information

### A direct approach for the expedient synthesis of unsymmetrical ethers by employing bromodimethylsulfonium bromide (BDMS) mediated C-S bond cleavage of naphthalene-2-ol sulfides

Kobirul Islam,<sup>a</sup> R. Sidick Basha,<sup>†a</sup> Ajaz A. Dar,<sup>†a</sup> Deb K. Das<sup>†a</sup> and Abu T. Khan<sup>\*a,b</sup>

<sup>a</sup> *Department of Chemistry, Indian Institute of Technology Guwahati, Guwahati 781 039, India*

<sup>b</sup> *Vice-Chancellor, Aliah University, IIA/27, New Town, Kolkata-700 156, West Bengal, India. Tel.: +91 361 2582305; fax: +91 361 2582349*

Email: [atk@iitg.ernet.in](mailto:atk@iitg.ernet.in) (A. T. Khan)

<sup>†</sup>These authors contributed equally

#### List of Contents

|                                                                                |       |
|--------------------------------------------------------------------------------|-------|
| 1. Title page                                                                  | 1     |
| 2. General Information                                                         | 2     |
| 3. Table SI-1                                                                  | 2     |
| 6. Spectroscopic Data                                                          | 3-11  |
| 8. Crystallographic description                                                | 11-12 |
| 9. Table SI-2, SI-3, SI-4                                                      | 12-13 |
| 10. Copy of spectra ( <sup>1</sup> H and <sup>13</sup> C NMR) of all compounds | 14-87 |

## I. General Information:

Melting points were determined on a melting point apparatus and are uncorrected. IR spectra were recorded on IR spectrophotometer.  $^1\text{H}$  and  $^{13}\text{C}$  NMR spectra were recorded on NMR spectrometer TMS as internal reference; chemical shifts ( $\delta$  scale) are reported in parts per million (ppm).  $^1\text{H}$  NMR Spectra are reported in the order: multiplicity, coupling constant ( $J$  value) in hertz (Hz) and number of protons; signals were characterized as s (singlet), d (doublet), t (triplet), q (quartet), sext (sextet), m (multiplet), and dd (doublet of doublet) and bs (broad singlet). Elemental analyses were carried out using CHNS/O analyzer. The X-ray crystallographic data were collected using a single XRD diffractometer.

**Table SI-1.** Synthesis of 1-[(alkyl/arylthio)(phenyl)methyl]naphthalene-2-ol (**1a-i**)<sup>a</sup>

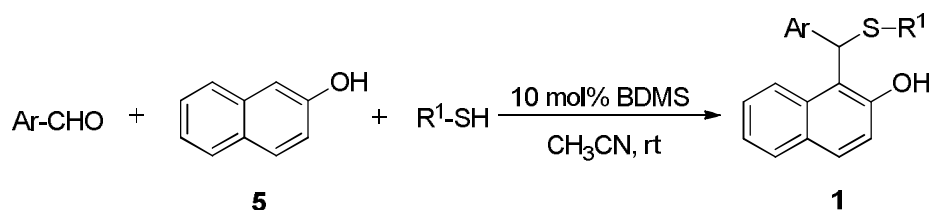

| Entry | Ar                                               | R <sup>1</sup>                     | Product   | Time/h | % Yield <sup>b</sup> |
|-------|--------------------------------------------------|------------------------------------|-----------|--------|----------------------|
| 1     | C <sub>6</sub> H <sub>5</sub>                    | 4-Me-C <sub>6</sub> H <sub>4</sub> | <b>1a</b> | 6      | 78                   |
| 2     | 4-NO <sub>2</sub> -C <sub>6</sub> H <sub>4</sub> | 4-Me-C <sub>6</sub> H <sub>4</sub> | <b>1b</b> | 6      | 80                   |
| 3     | 4-F-C <sub>6</sub> H <sub>4</sub>                | 4-Me-C <sub>6</sub> H <sub>4</sub> | <b>1c</b> | 6      | 78                   |
| 4     | 3-Br-C <sub>6</sub> H <sub>4</sub>               | 4-Me-C <sub>6</sub> H <sub>4</sub> | <b>1d</b> | 6      | 71 <sup>[c]</sup>    |
| 5     | 2-Naphthyl                                       | 4-Me-C <sub>6</sub> H <sub>4</sub> | <b>1e</b> | 6      | 76 <sup>[c]</sup>    |
| 6     | 4-Cl-C <sub>6</sub> H <sub>4</sub>               | 4-Me-C <sub>6</sub> H <sub>4</sub> | <b>1f</b> | 5      | 74                   |
| 7     | 4-Me-C <sub>6</sub> H <sub>4</sub>               | 4-Cl-C <sub>6</sub> H <sub>4</sub> | <b>1g</b> | 6      | 72                   |
| 8     | C <sub>6</sub> H <sub>5</sub>                    | C <sub>2</sub> H <sub>5</sub>      | <b>1h</b> | 6      | 74 <sup>[c]</sup>    |
| 9     | 4-NO <sub>2</sub> -C <sub>6</sub> H <sub>4</sub> | C <sub>3</sub> H <sub>7</sub>      | <b>1i</b> | 6      | 80 <sup>[c]</sup>    |

<sup>a</sup>The reactions were carried out in 2 mmol scale. <sup>b</sup>Isolated yield. <sup>c</sup>Reference No. 8a.

## II. General procedure for the preparation of 1-[aryl(alkyl/arylthio)methyl]-naphthalene-2-ol derivatives (**1**)

Bromodimethylsulfonium bromide BDMS (0.2 mmol) was added to a mixture of aromatic aldehyde (2.0 mmol) and 2-naphthol (2.0 mmol) in 5 mL of acetonitrile and the reaction mixture was kept for stirring at room temperature. Then, the corresponding thiol (2.0 mmol) was added into it and the progress of the reaction was monitored by TLC. After completion of the reaction, reaction mixture was evaporated in rotary evaporator and DCM (20 mL) was added into it and the organic layer was washed with 20 mL of water. The water layer was further extracted using DCM (2 x 10 mL). The combined organic layer was dried over anhydrous sodium sulfate and it was concentrated in a rotary evaporator. The crude mixture was purified through silica gel column chromatography and the desired products (**1**) were obtained by eluting with ethyl acetate and hexane (1:99) mixture.

The sulfides **1d**, **1e**, **1h** and **1i** were prepared by following reported procedure<sup>[8a]</sup> and spectroscopic data are available there.

Note: Ethanethiol and propanethiol were handled in a well-ventilated fume hood using airtight syring to avoid nuisance odour.

*1-(Phenyl(p-tolylthio)methyl)naphthalen-2-ol (1a)*

Gummy liquid (0.555 g, 78%);  $R_f$  (2% ethyl acetate/hexane) 0.40;  $^1\text{H NMR}$  (400 MHz,  $\text{CDCl}_3$ ):  $\delta$  8.36 (s, 1H), 7.65 (d,  $J = 8.8$  Hz, 1H), 7.52-7.49 (m, 2H), 7.37 (d,  $J = 7.6$  Hz, 2H), 7.18-7.00 (m, 8H), 6.71 (d,  $J = 8.0$  Hz, 2H), 6.45 (s, 1H), 1.94 (s, 3H) ppm;  $^{13}\text{C NMR}$  (100 MHz,  $\text{CDCl}_3$ ):  $\delta$  154.3, 138.5, 138.1, 133.0, 131.6, 130.3, 130.1, 129.9 (2C), 129.4, 129.0 (3C), 129.5 (3C), 127.8, 126.9, 123.2, 122.2, 120.0, 115.2, 51.4, 21.1 ppm; IR (KBr)  $\nu_{\text{max}}$  3434 (-OH)  $\text{cm}^{-1}$ ; Anal. Calcd for  $\text{C}_{24}\text{H}_{20}\text{OS}$  (356.48): C, 80.86; H, 5.65. Found: C, 80.98; H, 5.74.

*1-((4-Nitrophenyl)(p-tolylthio)methyl)naphthalen-2-ol (1b)*

Gummy liquid (0.642 g, 80%);  $R_f$  (2% ethyl acetate/hexane) 0.18;  $^1\text{H NMR}$  (400 MHz,  $\text{CDCl}_3$ ):  $\delta$  8.07 (d,  $J = 9.2$  Hz, 2H), 8.06-7.66 (m, 5H), 7.40-7.26 (m, 4H), 7.20 (d,  $J = 8.8$  Hz, 1H), 6.99 (d,  $J = 8.0$  Hz, 2H), 6.66 (s, 1H), 2.21 (s, 3H) ppm;  $^{13}\text{C NMR}$  (150 MHz,  $\text{CDCl}_3$ ):  $\delta$  153.3, 147.2, 147.1, 138.5, 132.5, 131.9 (2C), 130.8, 130.1 (2C), 129.7, 129.4 (2C), 129.2 (2C), 127.2, 123.9 (2C), 123.6, 122.5, 119.3, 115.7, 50.4, 21.2 ppm; IR (KBr)  $\nu_{\text{max}}$  3433 (-OH), 1588 ( $\text{NO}_2$ ), 1322 ( $\text{NO}_2$ )  $\text{cm}^{-1}$ ; Anal. Calcd for  $\text{C}_{24}\text{H}_{19}\text{NO}_3\text{S}$  (401.47): C, 71.80; H, 4.77. Found: C, 71.94; H, 4.84.

*1-((4-Fluorophenyl)(p-tolylthio)methyl)naphthalen-2-ol (1c)*

Gummy liquid (0.583 g, 78%);  $R_f$  (2% ethyl acetate/hexane) 0.42;  $^1\text{H NMR}$  (400 MHz,  $\text{CDCl}_3$ ):  $\delta$  8.41 (s, 1H), 7.73 (d,  $J = 8.8$  Hz, 1H), 7.68-7.66 (m, 2H), 7.46-7.42 (m, 2H), 7.33-7.20 (m, 4H), 7.14 (d,  $J = 8.8$  Hz, 1H), 6.96-6.87 (m, 4H), 6.52 (s, 1H), 2.12 (s, 3H) ppm;  $^{13}\text{C NMR}$  (150 MHz,  $\text{CDCl}_3$ ):  $\delta$  163.2, 161.5, 154.4, 138.5, 134.2, 133.0, 131.9 (3C), 130.5, 130.4, 130.3, 130.1 (2C), 129.5, 129.1, 127.1, 123.4, 122.0, 120.2, 116.0, 115.8, 50.9, 21.3 ppm; IR (KBr)  $\nu_{\text{max}}$  3430 (-OH)  $\text{cm}^{-1}$ ; Anal. Calcd for  $\text{C}_{24}\text{H}_{19}\text{FOS}$  (374.48): C, 76.98; H, 5.11. Found: C, 77.16; H, 5.18.

*1-((4-Chlorophenyl)(p-tolylthio)methyl)naphthalen-2-ol (1f)*

Gummy liquid (0.577 g, 74%);  $R_f$  (2% ethyl acetate/hexane) 0.50;  $^1\text{H NMR}$  (400 MHz,  $\text{CDCl}_3$ ):  $\delta$  8.06 (s, 1H), 7.46 (d,  $J = 8.8$  Hz, 3H), 7.16 (d,  $J = 8.4$  Hz, 2H), 7.09 (t,  $J = 8.4$  Hz, 2H), 7.03-6.99 (m, 5H), 6.90 (d,  $J = 8.8$  Hz, 1H), 6.68 (d,  $J = 8.0$  Hz, 1H), 6.24 (s, 1H), 1.94 (s, 3H) ppm;  $^{13}\text{C NMR}$  (100 MHz,  $\text{CDCl}_3$ ):  $\delta$  154.0, 138.2, 137.3, 133.6, 132.8, 131.7 (2C), 130.5, 130.0 (2C), 129.9 (2C), 129.5,

129.0 (3C), 127.0, 123.6, 123.4, 122.2, 119.8, 115.2, 50.6, 21.1 ppm; IR (KBr)  $\nu_{\max}$  3436 (-OH), 1622, 1467, 1226 (C-O)  $\text{cm}^{-1}$ ; Anal. Calcd for  $\text{C}_{24}\text{H}_{19}\text{ClOS}$  (390.93): C, 73.74; H, 4.90. Found: C, 73.92; H, 4.96.

*1-(((4-Chlorophenyl)thio)(p-tolyl)methyl)naphthalen-2-ol (1g)*

Gummy liquid (0.562 g, 72%);  $R_f$  (2% ethyl acetate/hexane) 0.54;  $^1\text{H}$  NMR (400 MHz,  $\text{CDCl}_3$ ):  $\delta$  8.01 (s, 1H), 7.81 (d,  $J = 8.4$  Hz, 1H), 7.73 (t,  $J = 8.8$  Hz, 2H), 7.41-7.33 (m, 4H), 7.31-7.25 (m, 3H), 7.12 (t,  $J = 7.2$  Hz, 2H), 7.08 (d,  $J = 6.8$  Hz, 2H), 6.59 (s, 1H), 2.31 (s, 3H) ppm;  $^{13}\text{C}$  NMR (100 MHz,  $\text{CDCl}_3$ ):  $\delta$  153.8, 137.7, 135.0, 133.7, 132.8, 132.7, 132.3 (2C), 130.5, 129.7 (2C), 129.5, 129.2 (2C), 129.0 (2C), 128.3 (2C), 127.1, 123.4, 122.3, 119.6, 50.4, 21.2 ppm; IR (KBr)  $\nu_{\max}$  3302 (-OH), 1622, 1467, 1226 (C-O)  $\text{cm}^{-1}$ ; Anal. Calcd for  $\text{C}_{24}\text{H}_{19}\text{ClOS}$  (390.93): C, 73.74; H, 4.90. Found: C, 73.86; H, 4.98.

*1-(Ethoxy (phenyl) methyl) naphthalen-2-ol (3a)*

Gummy liquid (0.261 g, 94%);  $R_f$  (2% ethyl acetate/hexane) 0.50;  $^1\text{H}$  NMR (400 MHz,  $\text{CDCl}_3$ ):  $\delta$  9.38 (s, 1H), 7.80-7.75 (m, 2H), 7.73 (d,  $J = 8.8$  Hz, 1H), 7.42-7.39 (m, 3H), 7.33-7.25 (m, 4H), 7.20 (d,  $J = 8.8$  Hz, 1H), 6.34 (s, 1H), 3.80-3.73 (m, 2H), 1.36 (t,  $J = 7.2$  Hz, 3H) ppm;  $^{13}\text{C}$  NMR (100 MHz,  $\text{CDCl}_3$ ):  $\delta$  154.6, 139.9, 132.4, 130.3, 129.0 (2C), 128.8 (2C), 128.5, 127.8 (2C), 127.0, 123.2, 121.5, 119.9, 114.9, 81.7, 66.3, 15.4 ppm; IR (KBr)  $\nu_{\max}$  3302 (-OH), 1622, 1467, 1226 (C-O)  $\text{cm}^{-1}$ ; Anal. Calcd for  $\text{C}_{19}\text{H}_{18}\text{O}_2$  (278.35): C, 81.99; H, 6.52. Found: C, 82.14; H, 6.60.

*1-(Methoxy (phenyl) methyl) naphthalen-2-ol (3b)*

White solid (0.237 g, 90%);  $R_f$  (2% ethyl acetate/hexane) 0.65; mp 74-75°C;  $^1\text{H}$  NMR (400 MHz,  $\text{CDCl}_3$ ):  $\delta$  9.12 (s, 1H), 7.78-7.73 (m, 2H), 7.71 (d,  $J = 8.4$  Hz, 1H), 7.40-7.36 (m, 3H), 7.31-7.23 (m, 4H), 7.18 (d,  $J = 8.4$  Hz, 1H), 6.20 (s, 1H), 3.55 (s, 3H) ppm;  $^{13}\text{C}$  NMR (100 MHz,  $\text{CDCl}_3$ ):  $\delta$  154.3, 139.5, 132.4, 130.4, 129.0 (2C), 128.8 (2C), 128.5, 127.8 (2C), 127.0, 123.2, 121.4, 119.8, 114.4, 83.7, 57.9 ppm; IR (KBr)  $\nu_{\max}$  3302(-OH), 1621, 1467, 1226 (C-O)  $\text{cm}^{-1}$ ; Anal. Calcd for  $\text{C}_{18}\text{H}_{16}\text{O}_2$  (264.32): C, 81.79; H, 6.10. Found: C, 81.94; H, 6.01; MS (ESI) calcd for  $\text{C}_{18}\text{H}_{15}\text{O}_2$  (M - H<sup>+</sup>) 263.1150, found 263.0648.

*1-(Phenyl (propoxy) methyl) naphthalen-2-ol (3c)*

White solid (0.268 g, 92%); mp 72-73 °C;  $R_f$  (2% ethyl acetate/hexane) 0.54;  $^1\text{H}$  NMR (400 MHz,  $\text{CDCl}_3$ ):  $\delta$  9.32 (s, 1H), 7.78-7.70 (m, 3H), 7.41-7.36 (m, 3H), 7.30-7.22 (m, 4H), 7.18 (d,  $J = 8.8$  Hz, 1H), 6.31 (s, 1H), 3.70-3.57 (m, 2H), 1.78-1.68 (m, 2H), 0.97 (t,  $J = 7.6$  Hz, 3H) ppm;  $^{13}\text{C}$  NMR (100



MHz, CDCl<sub>3</sub>):  $\delta$  154.5, 139.9, 132.4, 130.2, 129.0, 128.9, 128.7 (2C), 128.4, 127.7 (2C), 126.9, 123.1, 121.5, 119.9, 115.0, 81.8, 72.4, 23.0, 10.8 ppm; IR (KBr)  $\nu_{\max}$  3302 (-OH), 1601, 1467, 1226 (C-O) cm<sup>-1</sup>; Anal. Calcd for C<sub>20</sub>H<sub>20</sub>O<sub>2</sub> (292.368): C, 82.16; H, 6.89. Found: C, 82.02; H, 6.96; MS (ESI) calcd for C<sub>20</sub>H<sub>19</sub>O<sub>2</sub> (M - H<sup>+</sup>) 291.1385, found 291.1381.

*1-(Isopropoxy(phenyl)methyl)naphthalen-2-ol (3d)*

Light yellow solid (0.239 g, 82%); mp 43-45°C; *R<sub>f</sub>* (2% ethyl acetate/hexane) 0.55; <sup>1</sup>H NMR (CDCl<sub>3</sub>, 400 MHz)  $\delta$  9.52 (s, 1H), 7.86-7.81 (m, 3H), 7.51-7.45 (m, 3H), 7.40-7.31 (m, 4H), 7.28 (d, *J* = 8.8 Hz, 1H), 6.55 (s, 1H), 4.04-3.98 (m, 1H), 1.42 (d, *J* = 6.0 Hz, 3H), 1.36 (d, *J* = 6.4 Hz, 3H) ppm; <sup>13</sup>C NMR (CDCl<sub>3</sub>, 100 MHz)  $\delta$  154.9, 140.3, 132.4, 130.2, 129.0, 128.8, 128.7 (2C), 128.2, 127.7 (2C), 127.0, 123.1, 121.3, 120.0, 115.5, 78.2, 71.7, 22.6, 22.0 ppm; IR (KBr)  $\nu_{\max}$  3267, 1622, 1467, 1227 cm<sup>-1</sup>; Anal. Calcd for C<sub>20</sub>H<sub>20</sub>O<sub>2</sub> (292.37): C, 82.16; H, 6.89. Found: C, 81.94; H, 6.98.

*1-(Butoxy(phenyl)methyl)naphthalen-2-ol (3e)*

Gummy liquid (0.269 g, 88%); *R<sub>f</sub>* (2% ethyl acetate/hexane) 0.60; <sup>1</sup>H NMR (400 MHz, CDCl<sub>3</sub>)  $\delta$  9.31 (s, 1H), 7.77 (d, *J* = 8.4 Hz, 2H), 7.72 (d, *J* = 8.8 Hz, 1H), 7.41-7.37 (m, 3H), 7.31-7.25 (m, 4H), 7.17 (d, *J* = 8.8 Hz, 1H), 6.31 (s, 1H), 3.74-3.62 (m, 2H), 1.70 (q, *J* = 6.8 Hz, 2H), 1.43 (sex, *J* = 7.2 Hz, 2H), 0.93 (t, *J* = 8.0 Hz, 3H) ppm; <sup>13</sup>C NMR (100 MHz, CDCl<sub>3</sub>)  $\delta$  154.5, 139.9, 132.5, 130.3, 129.0 (2C), 128.8 (2C), 128.4, 127.8 (2C), 127.0, 123.2, 121.5, 120.0, 115.0, 81.9, 70.6, 31.9, 19.6, 14.0 ppm; IR (KBr)  $\nu_{\max}$  3302, 1622, 1463, 1226 (C-O) cm<sup>-1</sup>; Anal. Calcd for C<sub>21</sub>H<sub>22</sub>O<sub>2</sub> (306.40): C, 82.32; H, 7.24. Found: C, 82.48; H, 7.34.

*1-((Benzyloxy)(phenyl)methyl)naphthalen-2-ol (3f)*

grey solid (0.285 g, 84%); mp 104-106 °C; *R<sub>f</sub>* (2% ethyl acetate/hexane) 0.44; <sup>1</sup>H NMR (CDCl<sub>3</sub>, 400 MHz)  $\delta$  9.02 (s, 1H), 7.72-7.69 (m, 2H), 7.57 (d, *J* = 8.8 Hz, 1H), 7.30-7.12 (m, 13H), 6.35 (s, 1H), 4.69 (d, *J* = 11.6 Hz, 1H), 4.55 (d, *J* = 11.6 Hz, 1H) ppm; <sup>13</sup>C NMR (CDCl<sub>3</sub>, 150 MHz)  $\delta$  154.6, 139.5, 136.7, 132.6, 130.5, 129.1, 129.0, 128.9 (2C), 128.8 (3C), 128.7, 128.6, 128.5, 127.8 (2C), 127.1, 123.3, 121.4, 119.9, 114.5, 80.0, 71.9 ppm; IR (KBr)  $\nu_{\max}$  3320, 1618, 1466, 1226 cm<sup>-1</sup>; Anal. Calcd for C<sub>24</sub>H<sub>20</sub>O<sub>2</sub> (340.41): C, 84.68; H, 5.92 Found: C, 84.80; H, 6.01.

*1-((Allyloxy)(phenyl)methyl)naphthalen-2-ol (3g)*

white solid (0.238 g, 82%); mp 60-62 °C; *R<sub>f</sub>* (2% ethyl acetate/hexane) 0.44; <sup>1</sup>H NMR (CDCl<sub>3</sub>, 400 MHz)  $\delta$  9.14 (s, 1H), 7.77-7.30 (m, 2H), 7.70 (d, *J* = 8.4 Hz, 1H), 7.40-7.36 (m, 3H), 7.30-7.23 (m, 4H),

7.18 (d,  $J = 8.8$  Hz, 1H), 6.40 (s, 1H), 6.05-5.94 (m, 1H), 5.34-5.24 (m, 2H), 4.26-4.20 (m, 1H), 4.16-4.10 (m, 1H) ppm;  $^{13}\text{C}$  NMR ( $\text{CDCl}_3$ , 100 MHz)  $\delta$  154.5, 139.6, 133.4, 132.4, 130.4, 129.0, 128.9, 128.7 (2C), 128.4, 127.8 (2C), 127.0, 123.1, 121.4, 119.9, 118.9, 114.6, 80.3, 70.8 ppm; IR (KBr)  $\nu_{\text{max}}$  3312, 1621, 1600, 1467, 1225  $\text{cm}^{-1}$ ; Anal. Calcd for  $\text{C}_{20}\text{H}_{18}\text{O}_2$  (290.36): C, 82.73; H, 6.25. Found: C, 82.88; H, 6.34; MS (ESI) calcd for  $\text{C}_{20}\text{H}_{17}\text{O}_2$  ( $\text{M} - \text{H}^+$ ) 289.1229, found 289.0776.

*1-(Phenyl(prop-2-yn-1-yloxy)methyl)naphthalen-2-ol (3h)*

reddish liquid (0.230 g, 80%);  $R_f$  (2% ethyl acetate/hexane) 0.35;  $^1\text{H}$  NMR ( $\text{CDCl}_3$ , 400 MHz)  $\delta$  8.59 (s, 1H), 7.80-7.74 (m, 3H), 7.44-7.39 (m, 3H), 7.34-7.27 (m, 4H), 7.19 (d,  $J = 8.8$  Hz, 1H), 6.70 (s, 1H), 4.39 (dd,  $J = 2.4, 15.6$  Hz, 1H), 4.29 (dd,  $J = 2.4, 18.0$  Hz, 1H), 2.57 (t,  $J = 2.4$  Hz, 1H) ppm;  $^{13}\text{C}$  NMR ( $\text{CDCl}_3$ , 100 MHz)  $\delta$  154.5, 138.8, 132.6, 130.7, 129.0 (2C), 128.8 (2C), 128.7, 128.1 (2C), 127.1, 123.3, 121.5, 119.8, 113.7, 79.4, 78.6, 76.3, 56.8 ppm; IR (KBr)  $\nu_{\text{max}}$  3350, 3290, 2118, 1622, 1468, 1224  $\text{cm}^{-1}$ ; Anal. Calcd for  $\text{C}_{20}\text{H}_{16}\text{O}_2$  (288.34): C, 83.31; H, 5.59. Found: C, 83.46; H, 5.68.

*1-((Pent-4-en-1-yloxy)(phenyl)methyl)naphthalen-2-ol (3i)*

Off white (0.267 g, 84%) 58-60°C;  $R_f$  (2% ethyl acetate/hexane) 0.48;  $^1\text{H}$  NMR ( $\text{CDCl}_3$ , 400 MHz)  $\delta$  9.24 (s, 1H), 7.74-7.68 (m, 3H), 7.38-7.33 (m, 3H), 7.27-7.16 (m, 5H), 6.28 (s, 1H), 5.81-5.70 (m, 1H), 5.03-5.01 (m, 1H), 4.98-4.93 (m, 1H), 3.70-3.58 (m, 2H), 2.16-2.11 (m, 2H), 1.82-1.72 (m, 2H) ppm;  $^{13}\text{C}$  NMR ( $\text{CDCl}_3$ , 100 MHz)  $\delta$  154.4, 139.8, 137.8, 132.4, 130.3, 129.0, 128.9, 128.7 (2C), 128.4, 127.7 (2C), 127.0, 123.1, 121.4, 119.9, 115.5, 114.9, 81.8, 70.0, 30.4, 28.9 ppm; IR (KBr)  $\nu_{\text{max}}$  3299, 1622, 1600, 1467, 1226  $\text{cm}^{-1}$ ; Anal. Calcd for  $\text{C}_{22}\text{H}_{22}\text{O}_2$  (318.41): C, 82.99; H, 6.96. Found: C, 83.16; H, 7.04; MS (ESI) calcd for  $\text{C}_{22}\text{H}_{21}\text{O}_2$  ( $\text{M} - \text{H}^+$ ) 317.1542, found 317.1018.

*1-(Phenyl(4-phenylbutoxy)methyl)naphthalen-2-ol (3j)*

yellowish liquid (0.336 g, 88 %);  $R_f$  (2% ethyl acetate/hexane) 0.43;  $^1\text{H}$  NMR ( $\text{CDCl}_3$ , 400 MHz)  $\delta$  9.24 (s, 1H), 7.74 (t,  $J = 8.4$  Hz, 2H), 7.69 (d,  $J = 8.8$  Hz, 1H), 7.40-7.34 (m, 3H), 7.30-7.23 (m, 5H), 7.21-7.12 (m, 5H), 6.28 (s, 1H), 3.72-3.61 (m, 2H), 2.60 (t,  $J = 7.2$  Hz, 2H), 1.74-1.69 (m, 4H) ppm;  $^{13}\text{C}$  NMR ( $\text{CDCl}_3$ , 150 MHz)  $\delta$  154.4, 142.2, 139.8, 132.4, 130.3, 129.0, 128.9, 128.8 (2C), 128.6 (2C), 128.5 (2C), 128.4, 127.8 (2C), 127.0, 126.0, 123.2, 121.4, 119.9, 114.9, 81.8, 70.5, 35.7, 29.3, 28.0 ppm; IR (KBr)  $\nu_{\text{max}}$  3285, 1621, 1600, 1467, 1226  $\text{cm}^{-1}$ ; Anal. Calcd for  $\text{C}_{27}\text{H}_{26}\text{O}_2$  (382.49): C, 84.78; H, 6.85. Found: C, 84.90; H, 6.93; MS (ESI) calcd for  $\text{C}_{27}\text{H}_{25}\text{O}_2$  ( $\text{M} - \text{H}^+$ ) 381.1855, found 381.1700.

*1-((2-Hydroxyethoxy)(phenyl)methyl)naphthalen-2-ol (3k)*

gummy liquid (0.238 g, 81%);  $R_f$  (10% ethyl acetate/hexane) 0.13;  $^1\text{H NMR}$  ( $\text{CDCl}_3$ , 400 MHz)  $\delta$  8.97 (s, 1H), 7.78-7.73 (m, 2H), 7.70 (d,  $J = 8.4$  Hz, 1H), 7.41-7.36 (m, 3H), 7.31-7.25 (m, 4H), 7.17 (d,  $J = 8.8$  Hz, 1H), 6.38 (s, 1H), 3.83-3.74 (m, 4H), 2.16 (bs, 1H) ppm;  $^{13}\text{C NMR}$  ( $\text{CDCl}_3$ , 100 MHz)  $\delta$  154.3, 139.5, 132.4, 130.6, 129.1 (2C), 129.0 (2C), 128.7, 127.9 (2C), 127.1, 123.4, 121.5, 119.9, 114.5, 82.3, 71.9, 62.0 ppm; IR (KBr)  $\nu_{\text{max}}$  3317, 1621, 1600, 1467, 1224  $\text{cm}^{-1}$ ; Anal. Calcd for  $\text{C}_{19}\text{H}_{18}\text{O}_3$  (294.34): C, 77.53; H, 6.16. Found: C, 77.71; H, 6.22.

*1-((2-Acetoxyethoxy)(phenyl)methyl)naphthalen-2-yl acetate (3k')*

The compound **3k** (0.5 mmol) was added to a mixture of 1 mL of acetic anhydride and 1 mL of pyridine and kept for stirring overnight at room temperature. After completion of reaction, pyridine and unreacted acetic anhydride were removed by co-evaporation using toluene (1 x 2 mL) in a rotary evaporator. The resulting crude residue was purified through silica gel column to obtain pure product **3k'** in 94% yield as a gummy liquid. The product was obtained 0.138 g after purification and it was eluted with ethyl acetate and hexane (1:3).

$R_f$ : 0.5 (2% ethyl acetate/hexane);  $^1\text{H NMR}$  ( $\text{CDCl}_3$ , 400 MHz)  $\delta$  8.15 (d,  $J = 8.4$  Hz, 1H), 7.77 (d,  $J = 9.2$  Hz, 1H), 7.74 (d,  $J = 8.0$  Hz, 1H), 7.34-7.23 (m, 4H), 7.20-7.09 (m, 4H), 6.16 (s, 1H), 4.20-4.10 (m, 2H), 3.62-3.57 (m, 1H), 3.50-3.44 (m, 1H), 2.25 (s, 3H), 1.88 (s, 3H) ppm;  $^{13}\text{C NMR}$  ( $\text{CDCl}_3$ , 100 MHz)  $\delta$  171.2, 170.0, 148.1, 141.7, 132.8, 132.1, 130.5, 128.7, 128.3 (2C), 127.1, 126.5 (2C), 126.4, 126.0 (2C), 125.7, 121.6, 76.3, 67.2, 63.6, 21.1, 21.0 ppm; IR (KBr)  $\nu_{\text{max}}$  3058, 3022, 2928, 1766, 1730  $\text{cm}^{-1}$ ; Anal. Calcd for  $\text{C}_{23}\text{H}_{22}\text{O}_5$  (378.42): C, 73.01; H, 5.86. Found: C, 73.17; H, 5.94.

*1-(((8-Hydroxyoctyl)oxy)(phenyl)methyl)naphthalen-2-ol (3l)*

gummy liquid (0.309 g, 82%);  $R_f$  (10% ethyl acetate/hexane) 0.26;  $^1\text{H NMR}$  ( $\text{CDCl}_3$ , 400 MHz)  $\delta$  9.24 (s, 1H), 7.67 (d,  $J = 8.4$  Hz, 2H), 7.63 (d,  $J = 7.6$  Hz, 1H), 7.31-7.28 (m, 3H), 7.22-7.13 (m, 4H), 7.09 (d,  $J = 8.8$  Hz, 1H), 6.21 (s, 1H), 3.59-3.49 (m, 5H), 1.63-1.57 (m, 2H), 1.46-1.42 (m, 2H), 1.35-1.21 (m, 8H) ppm;  $^{13}\text{C NMR}$  ( $\text{CDCl}_3$ , 100 MHz)  $\delta$  154.3, 139.9, 132.3, 130.2, 128.9, 128.9, 128.7 (2C), 128.3, 127.7 (2C), 126.9, 123.1, 121.5, 119.8, 115.0, 81.7, 70.7, 62.9, 32.8, 29.7, 29.3 (2C), 26.1, 25.7 ppm; IR (KBr)  $\nu_{\text{max}}$  3303, 1622, 1601, 1463, 1226  $\text{cm}^{-1}$ ; Anal. Calcd for  $\text{C}_{25}\text{H}_{30}\text{O}_3$  (378.50): C, 79.33; H, 7.99. Found: C, 79.48; H, 8.06.

*1-(Methoxy(4-nitrophenyl)methyl)naphthalen-2-ol (3m)*

yellow solid (0.290 g, 94%); mp 101-103°C;  $R_f$  (2% ethyl acetate/hexane) 0.24;  $^1\text{H NMR}$  ( $\text{CDCl}_3$ , 400 MHz)  $\delta$  8.62 (s, 1H), 8.11 (d,  $J = 8.8$  Hz, 2H), 7.80 (d,  $J = 7.2$  Hz, 1H), 7.79 (d,  $J = 8.8$  Hz, 1H), 7.74 (d,  $J = 8.8$  Hz, 1H), 7.52 (d,  $J = 9.2$  Hz, 2H), 7.46 (td,  $J = 8.4, 1.2$  Hz, 1H), 7.34 (t,  $J = 8.0$  Hz, 1H), 7.17 (d,  $J = 8.8$  Hz, 1H), 6.32 (s, 1H), 3.60 (s, 3H) ppm;  $^{13}\text{C NMR}$  ( $\text{CDCl}_3$ , 100 MHz)  $\delta$  154.4, 147.8, 147.0, 132.5, 131.1, 129.3, 129.1, 128.2 (2C), 127.5, 123.9 (2C), 123.58, 121.1, 119.8, 113.6, 81.4, 58.2 ppm; IR (KBr)  $\nu_{\text{max}}$  3327, 1599, 1520, 1467, 1320, 1224  $\text{cm}^{-1}$ ; Anal. Calcd for  $\text{C}_{18}\text{H}_{15}\text{NO}_4$  (309.32): C, 69.89; H, 4.89; N, 4.53. Found: C, 70.07; H, 4.96; N, 4.64.

*1-(Butoxy(4-nitrophenyl)methyl)naphthalen-2-ol (3n)*

semi solid (0.308 g, 88%);  $R_f$  (2% ethyl acetate/hexane) 0.26;  $^1\text{H NMR}$  ( $\text{CDCl}_3$ , 400 MHz)  $\delta$  8.82 (s, 1H), 8.11 (d,  $J = 9.2$  Hz, 2H), 7.81-7.76 (m, 2H), 7.74 (d,  $J = 8.8$  Hz, 1H), 7.52 (d,  $J = 8.8$  Hz, 2H), 7.45 (td,  $J = 7.2, 1.2$  Hz, 1H), 7.33 (t,  $J = 8.0$  Hz, 1H), 7.16 (d,  $J = 8.8$  Hz, 1H), 6.40 (s, 1H), 3.78-3.66 (m, 2H), 1.75-1.65 (m, 2H), 1.47-1.39 (m, 2H), 0.93 (t,  $J = 7.6$  Hz, 3H) ppm;  $^{13}\text{C NMR}$  ( $\text{CDCl}_3$ , 100 MHz)  $\delta$  154.6, 147.8, 147.3, 132.4, 131.0, 129.3, 129.1, 128.2 (2C), 127.5, 123.9 (2C), 123.5, 121.3, 119.9, 114.2, 79.8, 70.9, 31.8, 19.5, 14.0 ppm; IR (KBr)  $\nu_{\text{max}}$  3313, 1623, 1520, 1467, 1347, 1225  $\text{cm}^{-1}$ ; Anal. Calcd for  $\text{C}_{21}\text{H}_{21}\text{NO}_4$  (351.40): C, 71.78; H, 6.02; N, 3.99. Found: C, 71.92; H, 5.92; N, 4.07.

*1-(Ethoxy(4-fluorophenyl)methyl)naphthalen-2-ol (3o)*

gummy liquid (0.278 g, 94%);  $R_f$  (2% ethyl acetate/hexane) 0.53;  $^1\text{H NMR}$  ( $\text{CDCl}_3$ , 400 MHz)  $\delta$  9.26 (s, 1H), 7.74-7.70 (m, 2H), 7.65 (d,  $J = 8.8$  Hz, 1H), 7.38-7.24 (m, 4H), 7.18 (d,  $J = 8.8$  Hz, 1H), 6.92 (t,  $J = 8.8$  Hz, 2H), 6.26 (s, 1H), 3.71-3.65 (m, 2H), 1.29 (t,  $J = 7.2$  Hz, 3H) ppm;  $^{13}\text{C NMR}$  ( $\text{CDCl}_3$ , 100 MHz)  $\delta$  154.5, 135.7, 132.3, 130.4, 129.6 (2C), 129.0 (2C), 128.9, 127.0, 123.2, 121.3, 119.8, 115.6, 115.4, 114.6, 80.8, 66.2, 15.3 ppm; IR (KBr)  $\nu_{\text{max}}$  3297, 1622, 1601, 1508, 1463, 1226  $\text{cm}^{-1}$ ; Anal. Calcd for  $\text{C}_{19}\text{H}_{17}\text{FO}_2$  (296.34): C, 77.01; H, 5.78. Found: C, 77.12; H, 5.84.

*1-((3-Bromophenyl)(methoxy)methyl)naphthalen-2-ol (3p)*

white solid (0.223 g, 92%); mp 90-92°C;  $R_f$  (2% ethyl acetate/hexane) 0.45;  $^1\text{H NMR}$  ( $\text{CDCl}_3$ , 400 MHz)  $\delta$  8.89 (s, 1H), 7.76-7.71 (m, 2H), 7.66 (d,  $J = 8.4$  Hz, 1H), 7.60-7.50 (m, 1H), 7.41-7.33 (m, 2H), 7.30-7.26 (m, 1H), 7.21-7.14 (m, 2H), 7.08-7.03 (m, 1H), 6.14 (s, 1H), 3.49 (s, 3H) ppm;  $^{13}\text{C NMR}$  ( $\text{CDCl}_3$ , 150 MHz)  $\delta$  154.4, 141.9, 132.4, 131.6, 130.7, 130.4, 129.1, 129.0, 127.2, 126.3, 123.4, 122.9, 121.2, 119.9 (2C), 113.7, 82.6, 58.1 ppm; IR (KBr)  $\nu_{\text{max}}$  3318, 1622, 1599, 1468, 1224  $\text{cm}^{-1}$ ; Anal. Calcd for

C<sub>18</sub>H<sub>15</sub>BrO<sub>2</sub> (343.21): C, 62.99; H, 4.41. Found: C, 63.14; H, 4.34; MS (ESI) calcd for C<sub>18</sub>H<sub>14</sub>BrO<sub>2</sub> (M - H<sup>+</sup>) 341.0177, found 341.0165.

*1-(Methoxy(naphthalen-2-yl)methyl)naphthalen-2-ol (3q)*

White solid (0.276 g, 88%); mp 98-100°C; *R<sub>f</sub>* (2% ethyl acetate/hexane) 0.40; <sup>1</sup>H NMR (CDCl<sub>3</sub>, 400 MHz) δ 9.20 (s, 1H), 7.79-7.73 (m, 8H), 7.56 (dd, *J* = 8.8, 1.6 Hz, 1H), 7.44-7.36 (m, 2H), 7.28 (t, *J* = 8.0 Hz, 1H), 7.22 (d, *J* = 9.2 Hz, 1H), 6.36 (s, 1H), 3.60 (s, 3H) ppm; <sup>13</sup>C NMR (CDCl<sub>3</sub>, 100 MHz) δ 154.5, 136.8, 133.3, 130.5 (2C), 129.0, 128.8, 128.5, 127.8 (2C), 127.0, 126.9, 126.5, 126.4, 125.7, 123.2, 121.5, 120.0, 114.3, 102.0, 84.0, 58.1 ppm; IR (KBr) ν<sub>max</sub> 3300, 1622, 1599, 1466, 1225 cm<sup>-1</sup>; Anal. Calcd for C<sub>22</sub>H<sub>18</sub>O<sub>2</sub> (314.38): C, 84.05; H, 5.77. Found: C, 84.22; H, 5.90.

*1-(Ethoxy(p-tolyl)methyl)naphthalen-2-ol (8)*

yellow liquid (0.262 g, 90%); *R<sub>f</sub>* (2% ethyl acetate/hexane) 0.50; <sup>1</sup>H NMR (CDCl<sub>3</sub>, 400 MHz) δ 9.41 (s, 1 H), 7.76-7.71 (m, 2H), 7.69 (d, *J* = 8.4 Hz, 1H), 7.36 (td, *J* = 6.8, 1.6 Hz, 1H), 7.28-7.25 (m, 3H), 7.17 (d, *J* = 8.8 Hz, 1H), 7.09 (d, *J* = 8.0 Hz, 2H), 6.27 (s, 1H), 3.73-3.71 (m, 2H), 2.27 (s, 3H), 1.32 (t, *J* = 7.2 Hz, 3H) ppm; <sup>13</sup>C NMR (CDCl<sub>3</sub>, 100 MHz) δ 154.4, 138.1, 136.9, 132.3, 130.1, 129.4 (3C), 128.9, 127.7 (2C), 126.8, 123.0, 121.4, 119.8, 115.0, 81.6, 65.9, 21.1, 15.2 ppm; IR (KBr) ν<sub>max</sub> 3287, 1622, 1600, 1467, 1226 cm<sup>-1</sup>; Anal. Calcd for C<sub>20</sub>H<sub>20</sub>O<sub>2</sub> (292.37): C, 82.16; H, 6.89. Found: C, 82.34; H, 6.80.

*Bis(4-methylphenyl)disulfide (6a)*<sup>23</sup>

solid; mp 44-45 °C (lit. m.p 43-46°C); *R<sub>f</sub>* (2% ethyl acetate/hexane) 0.80; <sup>1</sup>H NMR (400 MHz, CDCl<sub>3</sub>): δ 7.39 (d, *J* = 8.0 Hz, 4H), 7.11 (d, *J* = 8 Hz, 4H), 2.32 (s, 6H) ppm; <sup>13</sup>C NMR (100 MHz, CDCl<sub>3</sub>): δ 137.6 (2C), 134.1 (2C), 130.0 (4C), 128.7 (4C), 21.3 (2C) ppm.

*1-(Hydroxy(phenyl)methyl)naphthalen-2-ol (7a)*

white solid (0.210 g, 84%); mp 99-101°C; *R<sub>f</sub>* (10% ethyl acetate/hexane) 0.36; <sup>1</sup>H NMR (CDCl<sub>3</sub>, 400 MHz) δ 9.37 (s, 1H), 7.71 (d, *J* = 8.0 Hz, 1H), 7.67 (d, *J* = 8.8 Hz, 1H), 7.55 (d, *J* = 8.4 Hz, 1H), 7.34-7.18 (m, 7H), 7.71 (d, *J* = 8.4 Hz, 1H), 6.62 (s, 1H), 3.56 (s, 1H) ppm; <sup>13</sup>C NMR (CDCl<sub>3</sub>, 150 MHz) δ 154.7, 141.5, 131.7, 130.4, 129.1 (2C), 129.0, 128.9, 128.7, 127.4 (2C), 127.0, 123.2, 121.6, 120.2, 115.9, 74.9 ppm; IR (KBr) ν<sub>max</sub> 3373, 1623, 1600, 1467, 1226 cm<sup>-1</sup>; Anal. Calcd for C<sub>17</sub>H<sub>14</sub>O<sub>2</sub> (250.29): C, 81.58; H, 5.64. Found: C, 81.35; H, 5.70; MS (ESI) calcd for C<sub>17</sub>H<sub>13</sub>O<sub>2</sub> (M - H<sup>+</sup>) 249.0916, found 249.0799.

*1-(Hydroxy(4-nitrophenyl)methyl)naphthalen-2-ol (7b)*

reddish solid (0.260 g, 88%); mp 130-132°C;  $R_f$  (10% ethyl acetate/hexane) 0.15;  $^1\text{H}$  NMR ( $\text{CDCl}_3$ , 400 MHz)  $\delta$  8.54 (s, 1H), 8.10 (d,  $J = 8.8$  Hz, 2H), 7.79 (d,  $J = 8.0$  Hz, 1H), 7.75 (d,  $J = 8.8$  Hz, 1H), 7.68 (d,  $J = 8.8$  Hz, 1H), 7.53 (d,  $J = 8.8$  Hz, 2H), 7.45-7.41 (m, 1H), 7.36-7.31 (m, 1H), 7.13 (d,  $J = 8.8$  Hz, 1H), 6.83 (s, 1H), 3.81 (s, 1H) ppm;  $^{13}\text{C}$  NMR ( $\text{DMSO-d}_6$ , 100 MHz)  $\delta$  153.2, 152.1, 146.2, 131.6, 129.4, 128.5, 128.2, 126.8 (2C), 126.0, 123.2, 122.8 (3C), 122.4, 118.6, 68.4 ppm; IR (KBr)  $\nu_{\text{max}}$  3424, 1625, 1514, 1345  $\text{cm}^{-1}$ ; Anal. Calcd for  $\text{C}_{17}\text{H}_{13}\text{NO}_4$  (295.29): C, 69.15; H, 4.44; N, 4.74. Found: C, 69.37; H, 4.52; N, 4.86.

*1-((4-Fluorophenyl)(hydroxy)methyl)naphthalen-2-ol (7c)*

white solid (0.230 g, 86%); mp 101-102 °C;  $R_f$  (10% ethyl acetate/hexane) 0.31;  $^1\text{H}$  NMR ( $\text{CDCl}_3$ , 400 MHz)  $\delta$  9.19 (s, 1H), 7.77-7.72 (m, 2H), 7.58 (d,  $J = 8.8$  Hz, 1H), 7.39-7.34 (m, 3H), 7.31-7.25 (m, 1H), 7.15 (d,  $J = 8.8$  Hz, 1H), 6.98 (t,  $J = 8.4$  Hz, 2H), 6.72 (s, 1H), 3.27 (s, 1H) ppm;  $^1\text{H}$  NMR ( $\text{D}_2\text{O}$ , 400 MHz)  $\delta$  7.76 (d,  $J = 8.8$  Hz, 1H), 7.73 (d,  $J = 9.2$  Hz, 1H), 7.59 (d,  $J = 8.4$  Hz, 1H), 7.39-7.25 (m, 4H), 7.15 (d,  $J = 8.8$  Hz, 1H), 6.97 (t,  $J = 8.4$  Hz, 2H), 6.71 (s, 1H) ppm;  $^{13}\text{C}$  NMR ( $\text{CDCl}_3$ , 100 MHz)  $\delta$  154.5, 137.3, 131.6, 131.5, 129.2 (2C), 129.2, 129.0, 129.0, 127.1, 123.4, 121.5, 120.0, 116.2, 116.0, 115.8, 73.8 ppm; IR (KBr)  $\nu_{\text{max}}$  3372, 1622, 1467, 1226  $\text{cm}^{-1}$ ; Anal. Calcd for  $\text{C}_{17}\text{H}_{13}\text{FO}_2$  (268.28): C, 76.11; H, 4.88. Found: C, 75.92; H, 4.96; MS (ESI) calcd for  $\text{C}_{17}\text{H}_{12}\text{FO}_2$  ( $\text{M} - \text{H}^+$ ) 267.0821, found 267.0577.

*1-((4-Chlorophenyl)(hydroxy)methyl)naphthalen-2-ol (7d)*

white solid (0.238 g, 84%); mp 111-113 °C;  $R_f$  (10% ethyl acetate/hexane) 0.34;  $^1\text{H}$  NMR ( $\text{CDCl}_3$ , 400 MHz)  $\delta$  7.77 (d,  $J = 8.0$  Hz, 1H), 7.75 (d,  $J = 8.8$  Hz, 1H), 7.62 (d,  $J = 8.4$  Hz, 1H), 7.41-7.25 (m, 6H), 7.17 (d,  $J = 8.8$  Hz, 1H), 6.77 (s, 1H) ppm;  $^{13}\text{C}$  NMR ( $\text{CDCl}_3$ , 100 MHz)  $\delta$  154.6, 140.0, 134.4, 131.6, 130.6, 129.2 (2C), 129.1 (2C), 128.8 (2C), 127.2, 123.4, 121.5, 120.1, 116.0, 73.6 ppm; IR (KBr)  $\nu_{\text{max}}$  3378, 1622, 1467, 1226  $\text{cm}^{-1}$ ; Anal. Calcd for  $\text{C}_{17}\text{H}_{13}\text{ClO}_2$  (284.74): C, 71.71; H, 4.60. Found: C, 71.48; H, 4.70.

*1-(Hydroxy(p-tolyl)methyl)naphthalen-2-ol (9)*

white solid (0.216 g, 82%); mp 120-121°C;  $R_f$  (10% ethyl acetate/hexane) 0.35;  $^1\text{H}$  NMR ( $\text{CDCl}_3$ , 400 MHz)  $\delta$  9.40 (s, 1H), 7.74 (t,  $J = 9.2$  Hz, 2H), 7.61 (d,  $J = 8.4$  Hz, 1H), 7.34-7.24 (m, 4H), 7.17 (d,  $J = 8.8$  Hz, 1H), 7.12 (d,  $J = 7.6$  Hz, 2H), 6.73 (s, 1H), 3.14 (s, 1H), 2.30 (s, 3H) ppm;  $^{13}\text{C}$  NMR ( $\text{CDCl}_3$ , 100 MHz)  $\delta$  154.8, 138.7, 138.6, 131.7, 130.3, 129.8 (3C), 128.9, 127.4 (2C), 126.9, 123.2, 121.7,

120.2, 115.9, 75.0, 21.3 ppm; IR (KBr)  $\nu_{\max}$  3413, 1624, 1467, 1225  $\text{cm}^{-1}$ ; Anal. Calcd for  $\text{C}_{18}\text{H}_{16}\text{O}_2$  (264.32): C, 81.79; H, 6.10. Found: C, 82.02; H, 6.16; MS (ESI) calcd for  $\text{C}_{18}\text{H}_{15}\text{O}_2$  ( $\text{M} - \text{H}^+$ ) 263.1072, found 263.1006.

*1-(ethoxymethyl)naphthalen-2-ol (18)*

Semi solid (0.170 g, 89%);  $R_f$  (10% ethyl acetate/hexane) 0.30;  $^1\text{H}$  NMR ( $\text{CDCl}_3$ , 400 MHz)  $\delta$  8.75 (s, 1H), 7.68 (d,  $J = 8.4$  Hz, 2H), 7.58 (dd,  $J = 8.4, 2.4$  Hz, 1H), 7.34 (td,  $J = 7.2, 1.2$  Hz, 1H), 7.21 (t,  $J = 7.2$  Hz, 1H), 7.02 (d,  $J = 9.0$  Hz, 1H), 5.12 (s, 2H), 3.62 (q,  $J = 7.2$  Hz, 2H), 1.24 (t,  $J = 7.2$  Hz, 3H) ppm;  $^{13}\text{C}$  NMR ( $\text{CDCl}_3$ , 100 MHz)  $\delta$  154.7, 131.8, 129.7, 128.9, 128.8, 126.7, 123.1, 121.1, 119.4, 112.1, 69.1, 67.1, 15.1 ppm; IR (KBr)  $\nu_{\max}$  3311, 1624, 1468, 1227  $\text{cm}^{-1}$ ; Anal. Calcd for  $\text{C}_{13}\text{H}_{14}\text{O}_2$  (202.25): C, 77.20; H, 6.98; Found: C, 77.34; H, 7.06.

**Crystallographic Description:**

The X-ray crystal structures were determined with diffractometer. Complete crystallographic data of **3p** and **7a** (CCDC no. is 913509 and 913508) for the structural analysis have been deposited with the Cambridge Crystallographic Data Centre, Copies of this information may be obtained free of charge from the Director, Cambridge Crystallographic Data Centre, 12 Union Road, Cambridge CB2 1EZ, UK, (fax: +44-1223-336033, e-mail: [deposit@ccdc.cam.ac.uk](mailto:deposit@ccdc.cam.ac.uk) or via: [www.ccdc.cam.ac.uk](http://www.ccdc.cam.ac.uk)). The crystal structures of **3p** and **7a** were obtained by single crystal X-ray diffraction technique. The Single crystals of **3p** was obtained by slow evaporation of dichloromethane and chloroform (1:3) solution of compound. Single crystals of **7a** was obtained by slow evaporation of dichloromethane and hexane (1:3) solution of compound. The selected crystallographic data of **3p** and **7a** are given in Table S1. The crystals of all compounds were mounted on glass fiber. All geometric and intensity data for the crystals were collected at room temperature using a diffractometer equipped with a fine focus 1.75 kW sealed tube Mo  $\text{K}\alpha$  ( $\lambda = 0.71073 \text{ \AA}$ ) X-ray source, with increasing  $\omega$  (width of  $0.3^\circ$  per frame) at a scan speed of 3 s/frame.

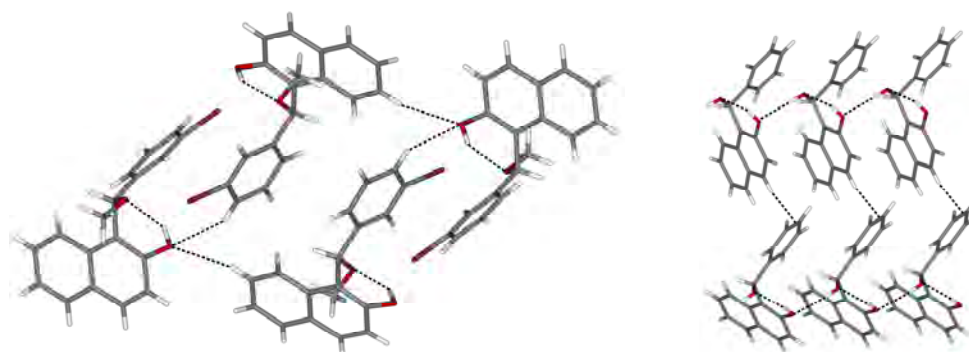

**Figure SI-1.** Schematic representation of **3p** self-assembled through weak C-H $\cdots$ O hydrogen bonding interactions viewed along *b*-axis (Left). Hydrogen-bonded 1D chain structure of **7a** forms 2D supramolecular assembly via C-H $\cdots$  $\pi$  interaction viewed along *b*-axis (Right).

**Table SI-2.** Crystallographic data and refinement parameters<sup>a</sup>

| Compounds                                            | <b>3p</b>                                         | <b>7a</b>                                      |
|------------------------------------------------------|---------------------------------------------------|------------------------------------------------|
| Empirical formula                                    | C <sub>18</sub> H <sub>14</sub> Br O <sub>2</sub> | C <sub>17</sub> H <sub>14</sub> O <sub>2</sub> |
| <i>M</i>                                             | 342.20                                            | 250.28                                         |
| Wavelength Å                                         | 0.71073                                           | 0.71073                                        |
| Crystal system                                       | Monoclinic                                        | Monoclinic                                     |
| Space group                                          | <i>P2(1)/n</i>                                    | <i>P2(1)/c</i>                                 |
| <i>a</i> , Å                                         | 13.1085(6)                                        | 4.7273(6)                                      |
| <i>b</i> , Å                                         | 7.3865(4)                                         | 13.5885(16)                                    |
| <i>c</i> , Å                                         | 16.4008(7)                                        | 20.003(3)                                      |
| $\alpha$                                             | 90.00°                                            | 90.00°                                         |
| $\beta$                                              | 107.548(3)°                                       | 96.613(7)°                                     |
| $\gamma$                                             | 90.00°                                            | 90.00°                                         |
| <i>V</i> / Å <sup>3</sup>                            | 1514.12(13)                                       | 1276.4(3)                                      |
| <i>Z</i>                                             | 4                                                 | 4                                              |
| $\rho$ /g cm <sup>-3</sup>                           | 1.501                                             | 1.302                                          |
| $\mu$ /mm <sup>-1</sup>                              | 2.716                                             | 0.084                                          |
| Reflns collected                                     | 16477                                             | 14730                                          |
| Indep reflns                                         | 2659                                              | 2208                                           |
| GOF                                                  | 0.949                                             | 0.969                                          |
| Final R indices [ <i>I</i> >2 $\sigma$ ( <i>I</i> )] | <i>R</i> 1=0.0447<br><i>wR</i> 2 = 0.0864         | <i>R</i> 1 = 0.0434<br><i>wR</i> 2 =0.1036     |
| R indices (all data)                                 | <i>R</i> 1=0.1202<br><i>wR</i> 2=0.1092           | <i>R</i> 1 = 0.0779<br><i>wR</i> 2=0.1216      |

<sup>a</sup>Refinement methods: full-matrix least-square on *F*<sup>2</sup>.



**Table SI-3.** Selected bond distances (Å) of compounds **3p** and **7a**

| <b>3p</b> |          |         |          |         |          |         |          |
|-----------|----------|---------|----------|---------|----------|---------|----------|
| O1-C1     | 1.366(5) | C1-C2   | 1.392(5) | C2-C3   | 1.334(6) | C3-C4   | 1.425(6) |
| C5-C4     | 1.389(6) | C5-C6   | 1.358(8) | C6-C7   | 1.407(7) | C1-C10  | 1.388(5) |
| C7-C8     | 1.370(5) | C11-O2  | 1.428(4) | C9-C8   | 1.425(5) | C10-C9  | 1.420(5) |
| C9-C4     | 1.417(5) | C10-C11 | 1.523(5) | C12-C17 | 1.390(5) | C12-C13 | 1.378(5) |
| C11-C12   | 1.525(5) | C13-C14 | 1.389(5) | C14-C15 | 1.386(5) | C15-C16 | 1.350(6) |
| C16-C17   | 1.390(5) | Br1-C16 | 1.897(4) |         |          |         |          |
| <b>7a</b> |          |         |          |         |          |         |          |
| C9-O1     | 1.381(2) | C1-C2   | 1.374(3) | C1-C6   | 1.382(2) | C1-C7   | 1.518(2) |
| C2-C3     | 1.387(3) | C3-C4   | 1.355(3) | C4-C5   | 1.377(3) | C5-C6   | 1.379(3) |
| C7-O2     | 1.436(2) | C7-C8   | 1.520(2) | C8-C9   | 1.384(2) | C9-C10  | 1.399(3) |
| C8-C17    | 1.428(2) | C10-C11 | 1.349(3) | C11-C12 | 1.411(2) | C12-C13 | 1.416(3) |
| C13-C14   | 1.355(3) | C14-C15 | 1.397(3) | C15-C16 | 1.360(2) | C16-C17 | 1.425(2) |
| C17-C12   | 1.426(2) |         |          |         |          |         |          |

**Table SI-4.** H-bond interactions in **7a** and **3p**

| D-H...A      | $d(\text{D-H})(\text{Å})$ | $d(\text{H}\cdots\text{A})(\text{Å})$ | $d(\text{D}\cdots\text{A})(\text{Å})$ | $\angle\text{DHA}(\text{ }^\circ)$ |
|--------------|---------------------------|---------------------------------------|---------------------------------------|------------------------------------|
| <b>7a</b>    |                           |                                       |                                       |                                    |
| O1-H1...O2   | 0.82                      | 1.91                                  | 2.6235(18)                            | 145                                |
| O2-H2...O1   | 0.82                      | 2.08                                  | 2.8841(18)                            | 167                                |
| C2-H2A...O2  | 0.93                      | 2.37                                  | 2.727(2)                              | 103                                |
| <b>3p</b>    |                           |                                       |                                       |                                    |
| O1-H1...O2   | 0.82                      | 1.96                                  | 2.669(4)                              | 144                                |
| C17-H17...O2 | 0.93                      | 2.34                                  | 2.694(4)                              | 102                                |

# <sup>1</sup>H NMR spectra of 1a

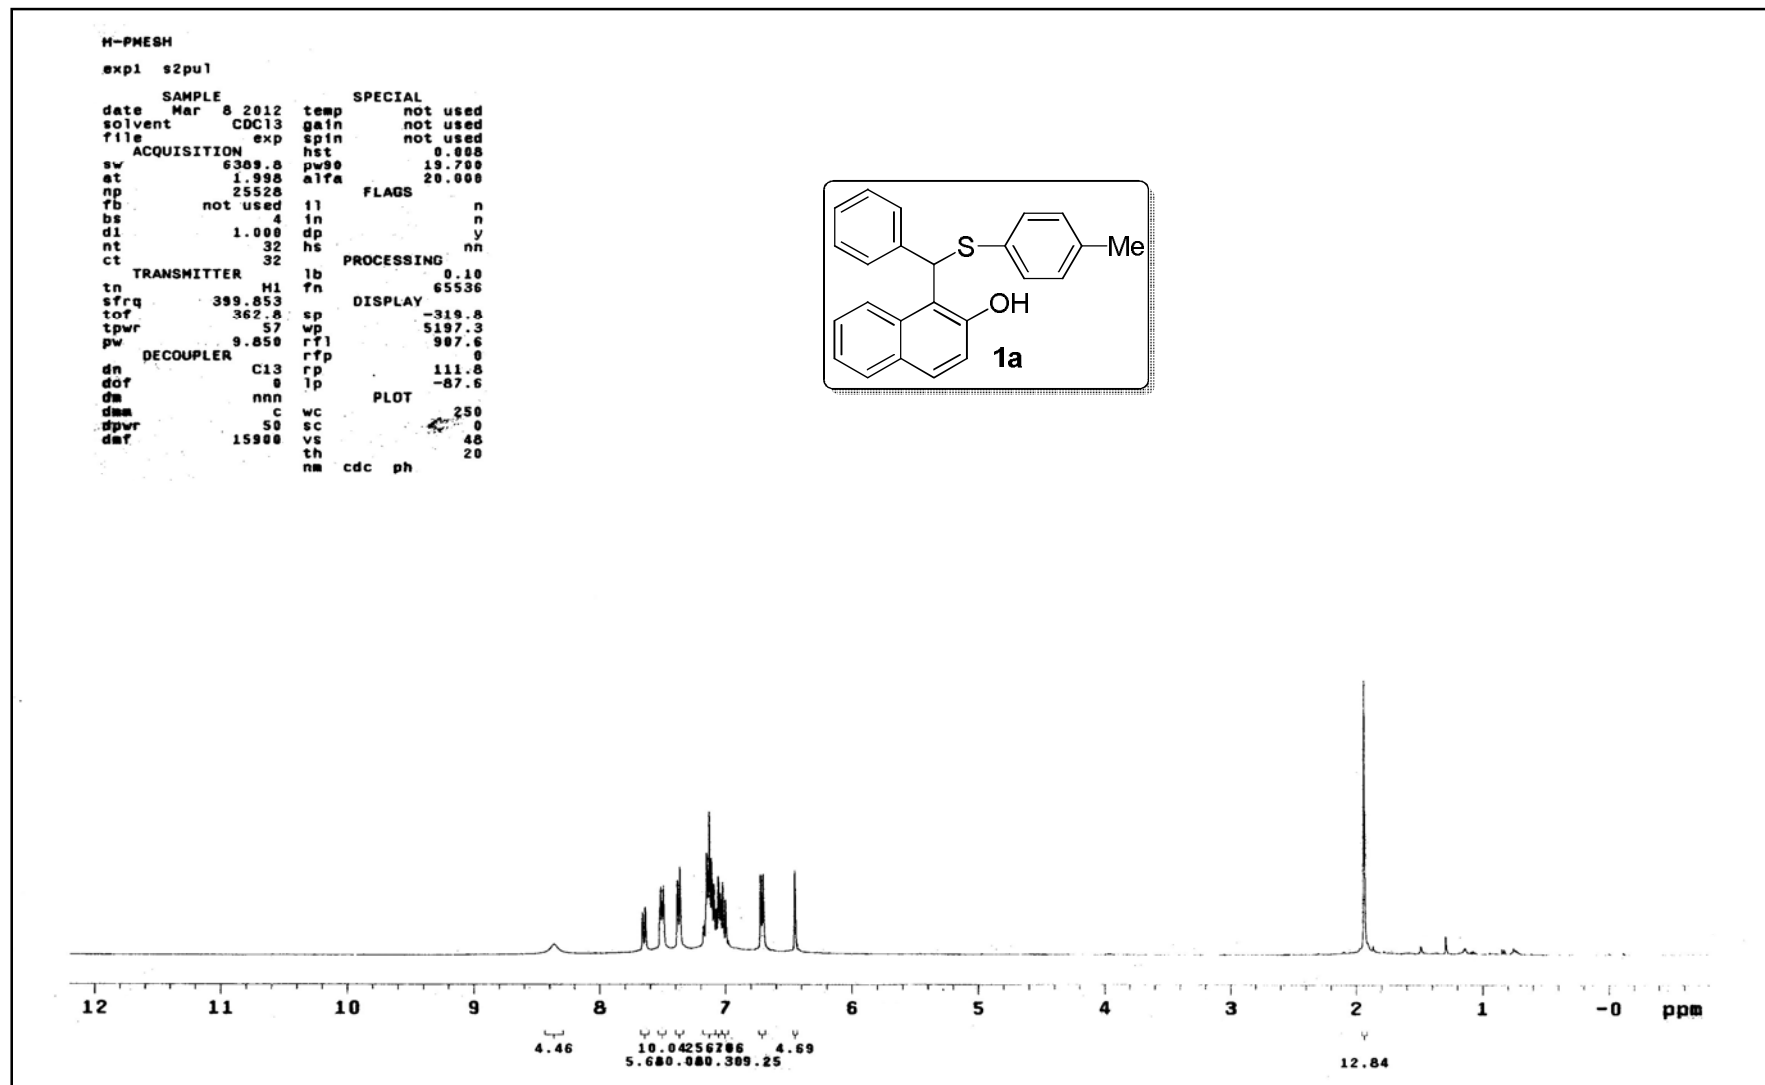

<sup>13</sup>C NMR spectra of 1a

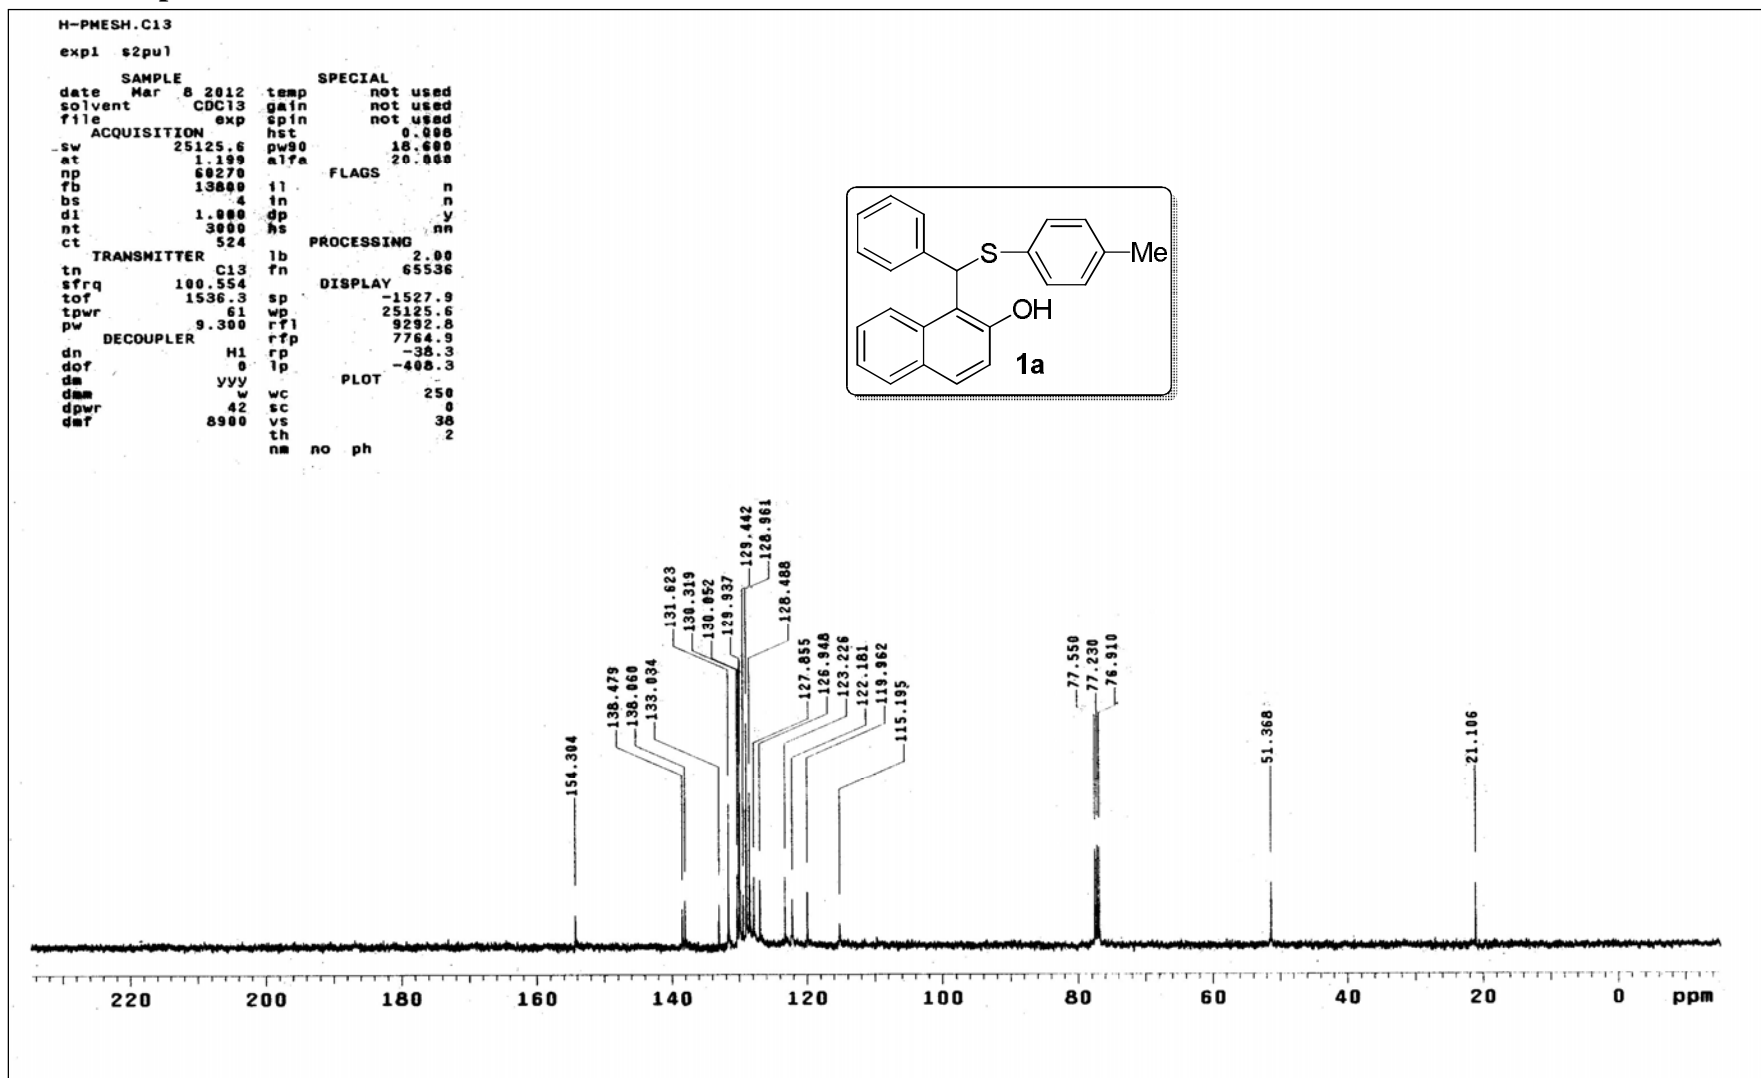

<sup>1</sup>H NMR spectra of 1b

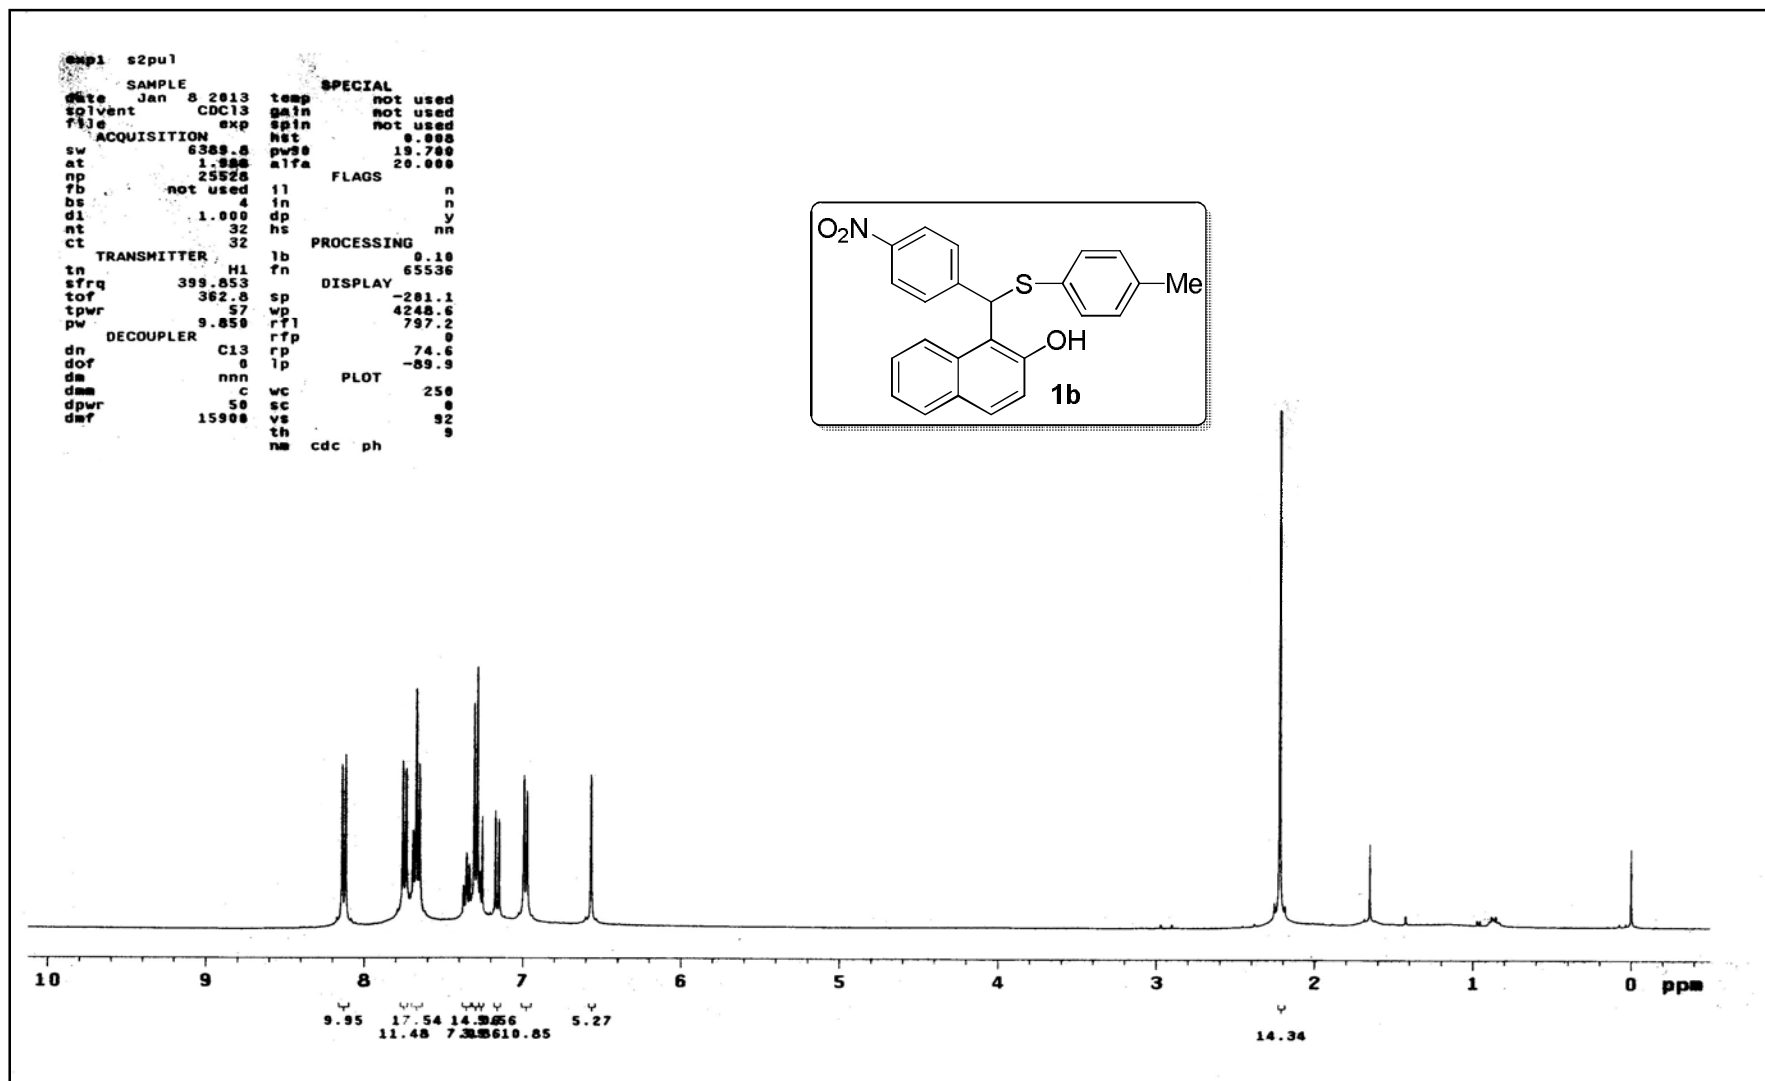

# <sup>13</sup>C NMR spectra of 1b

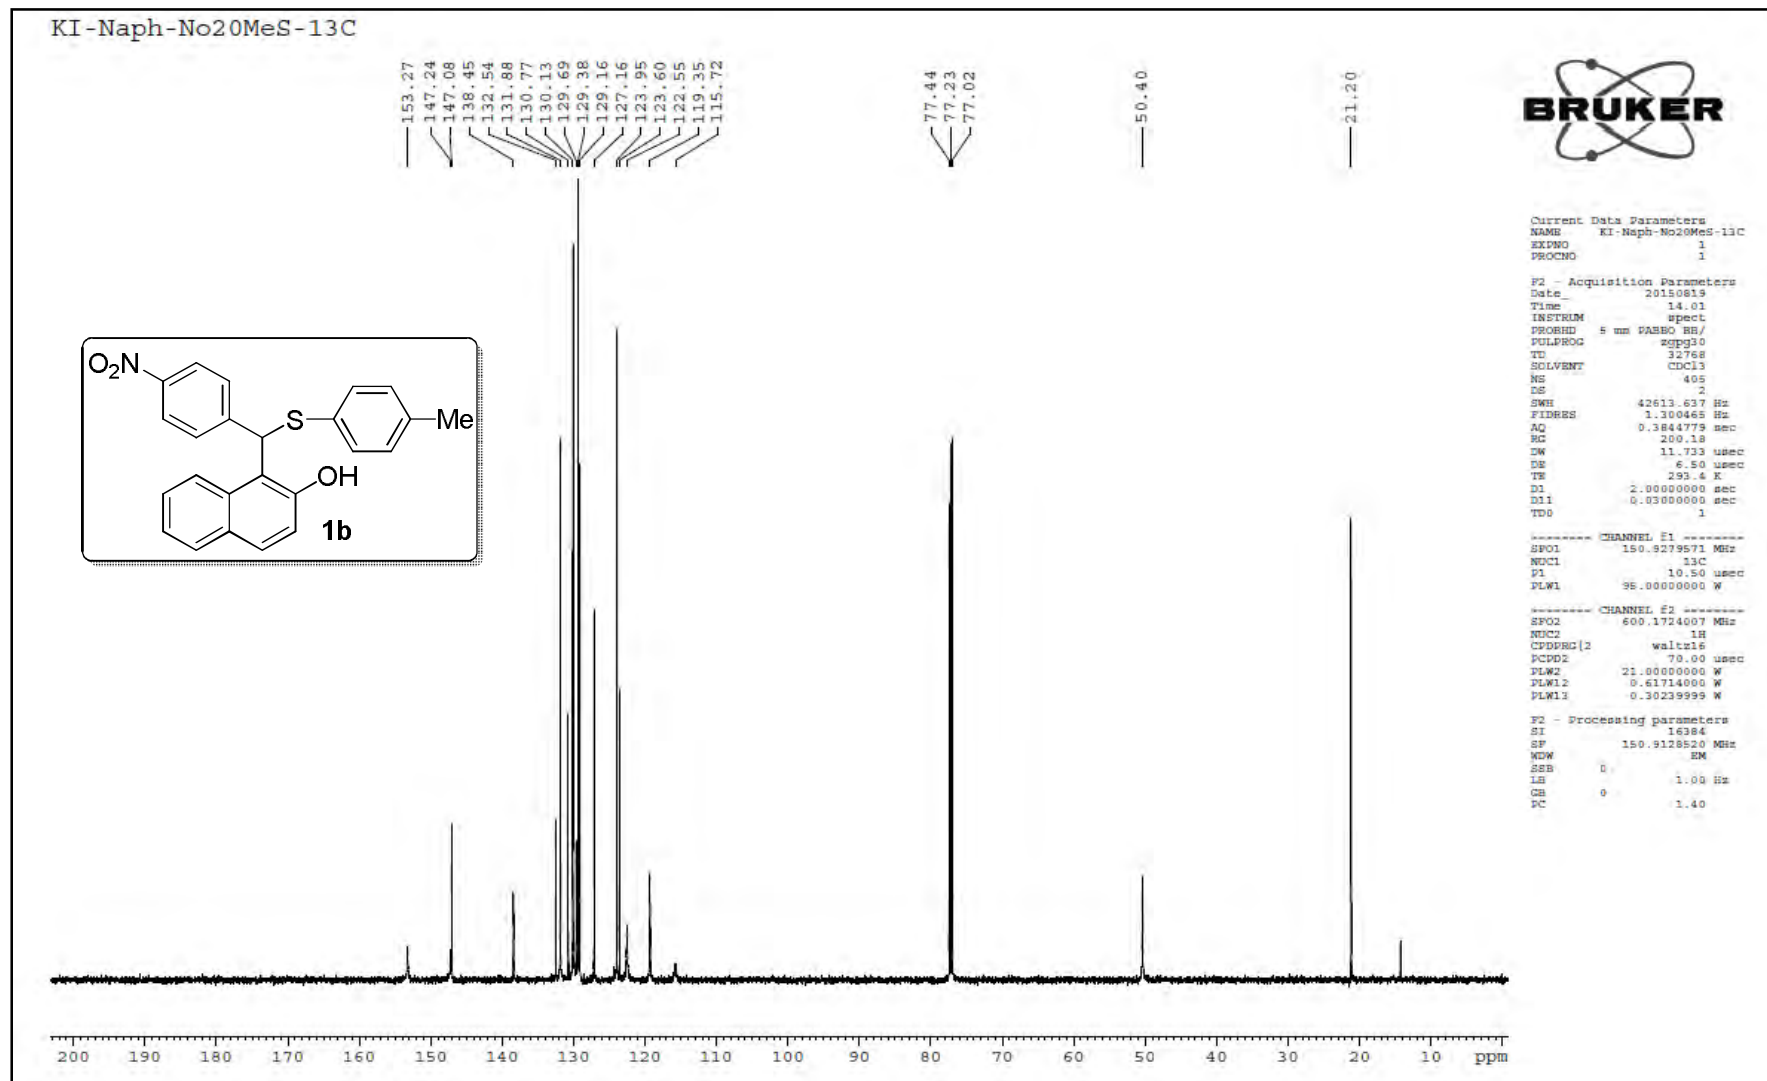

# <sup>1</sup>H NMR spectra of 1c

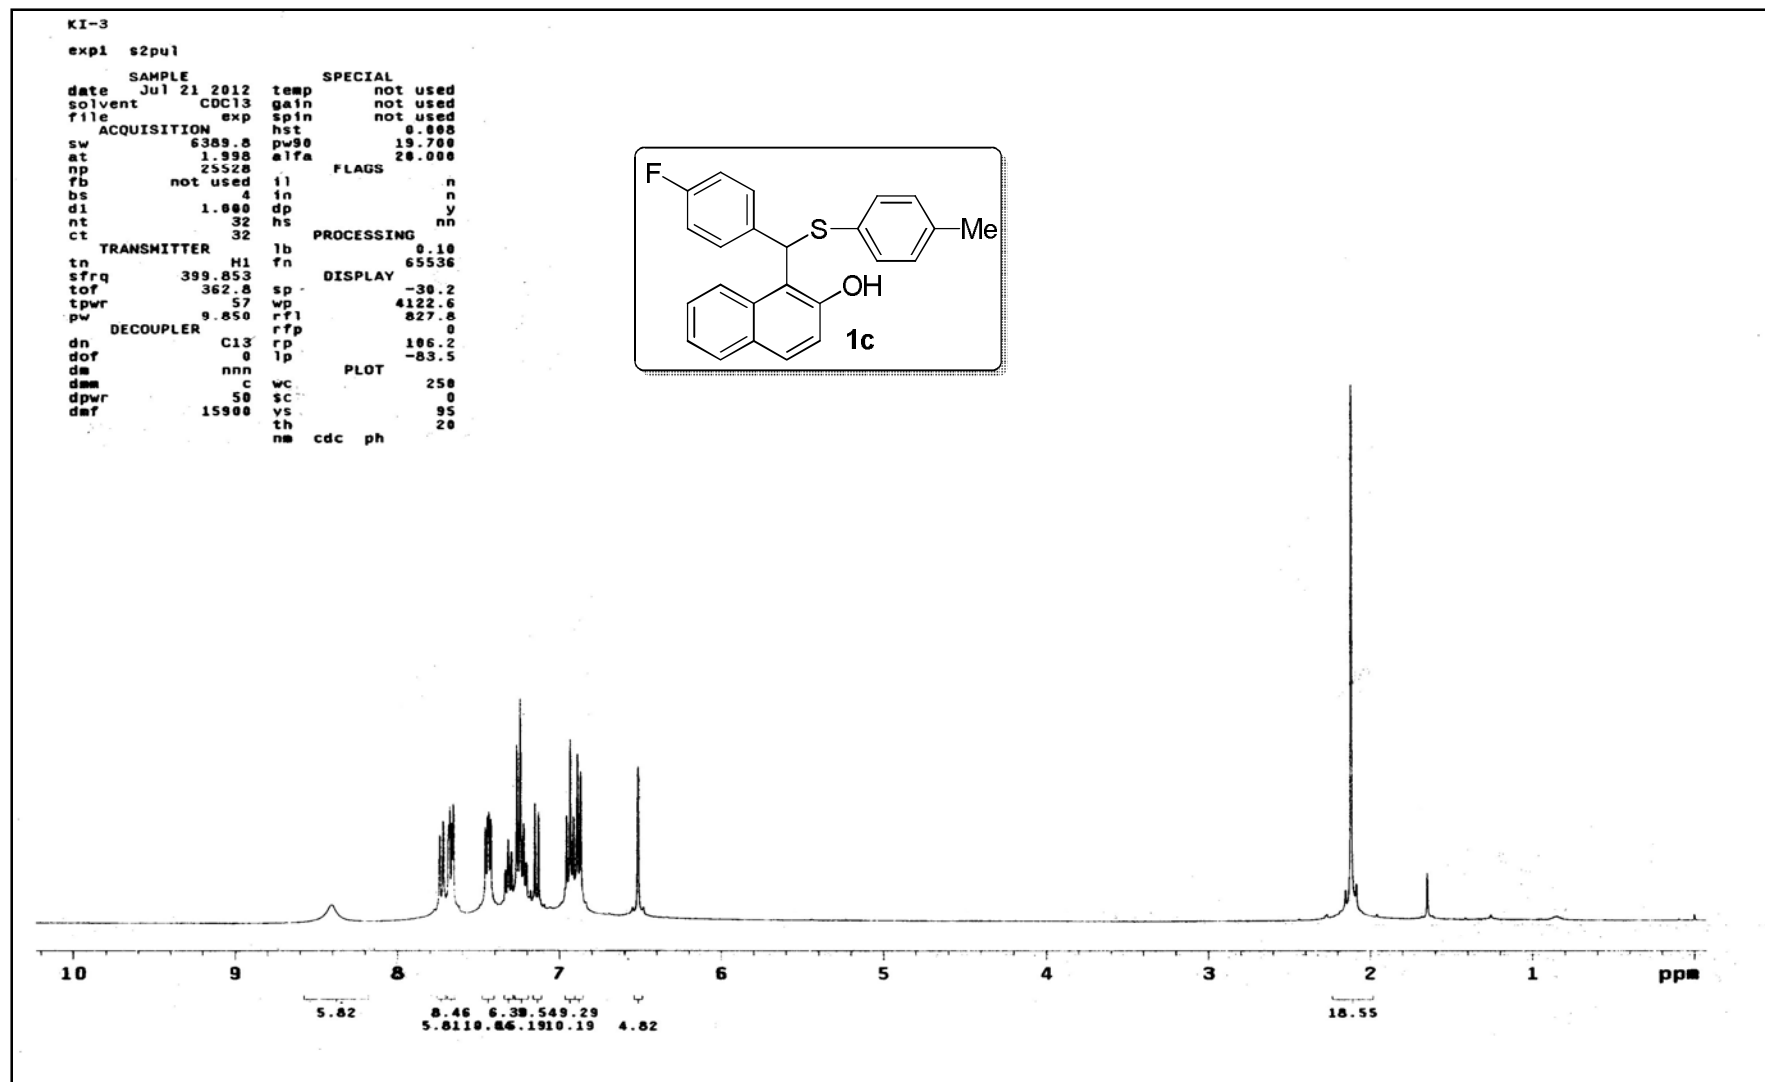

<sup>13</sup>C NMR spectra of 1c

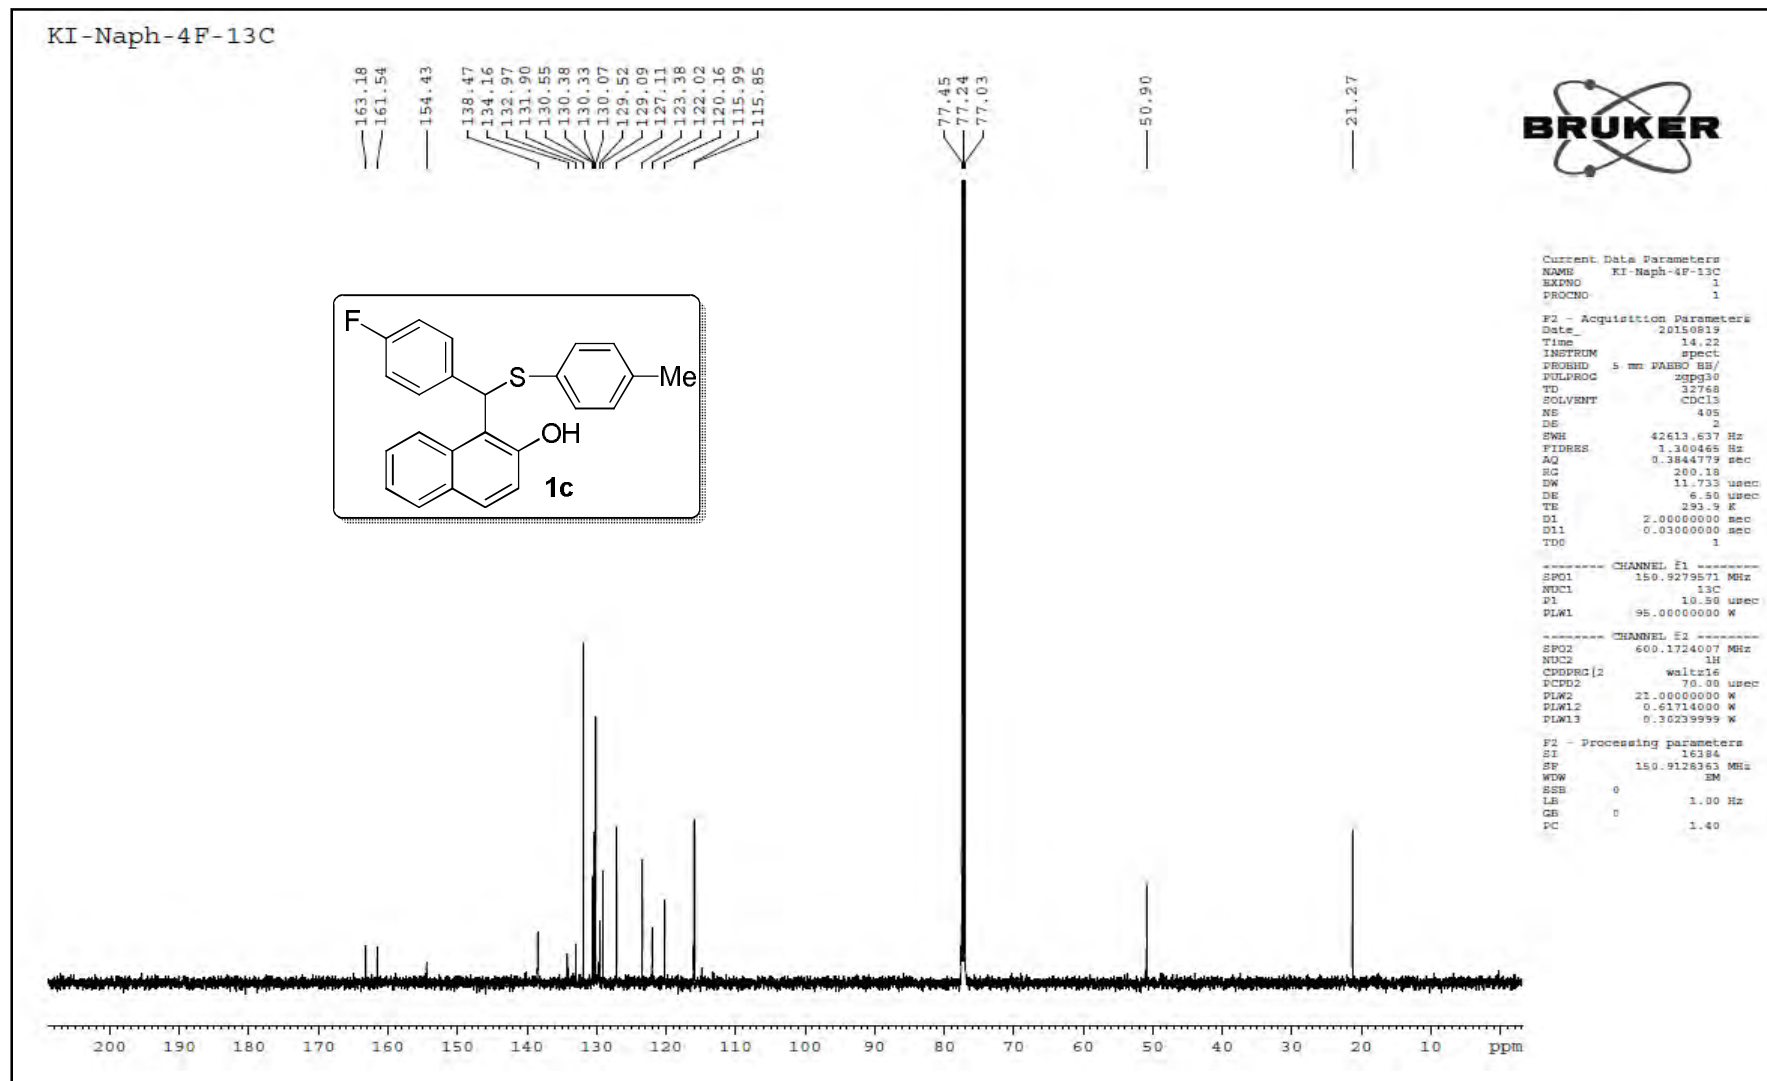

# <sup>1</sup>H NMR spectra of 1f

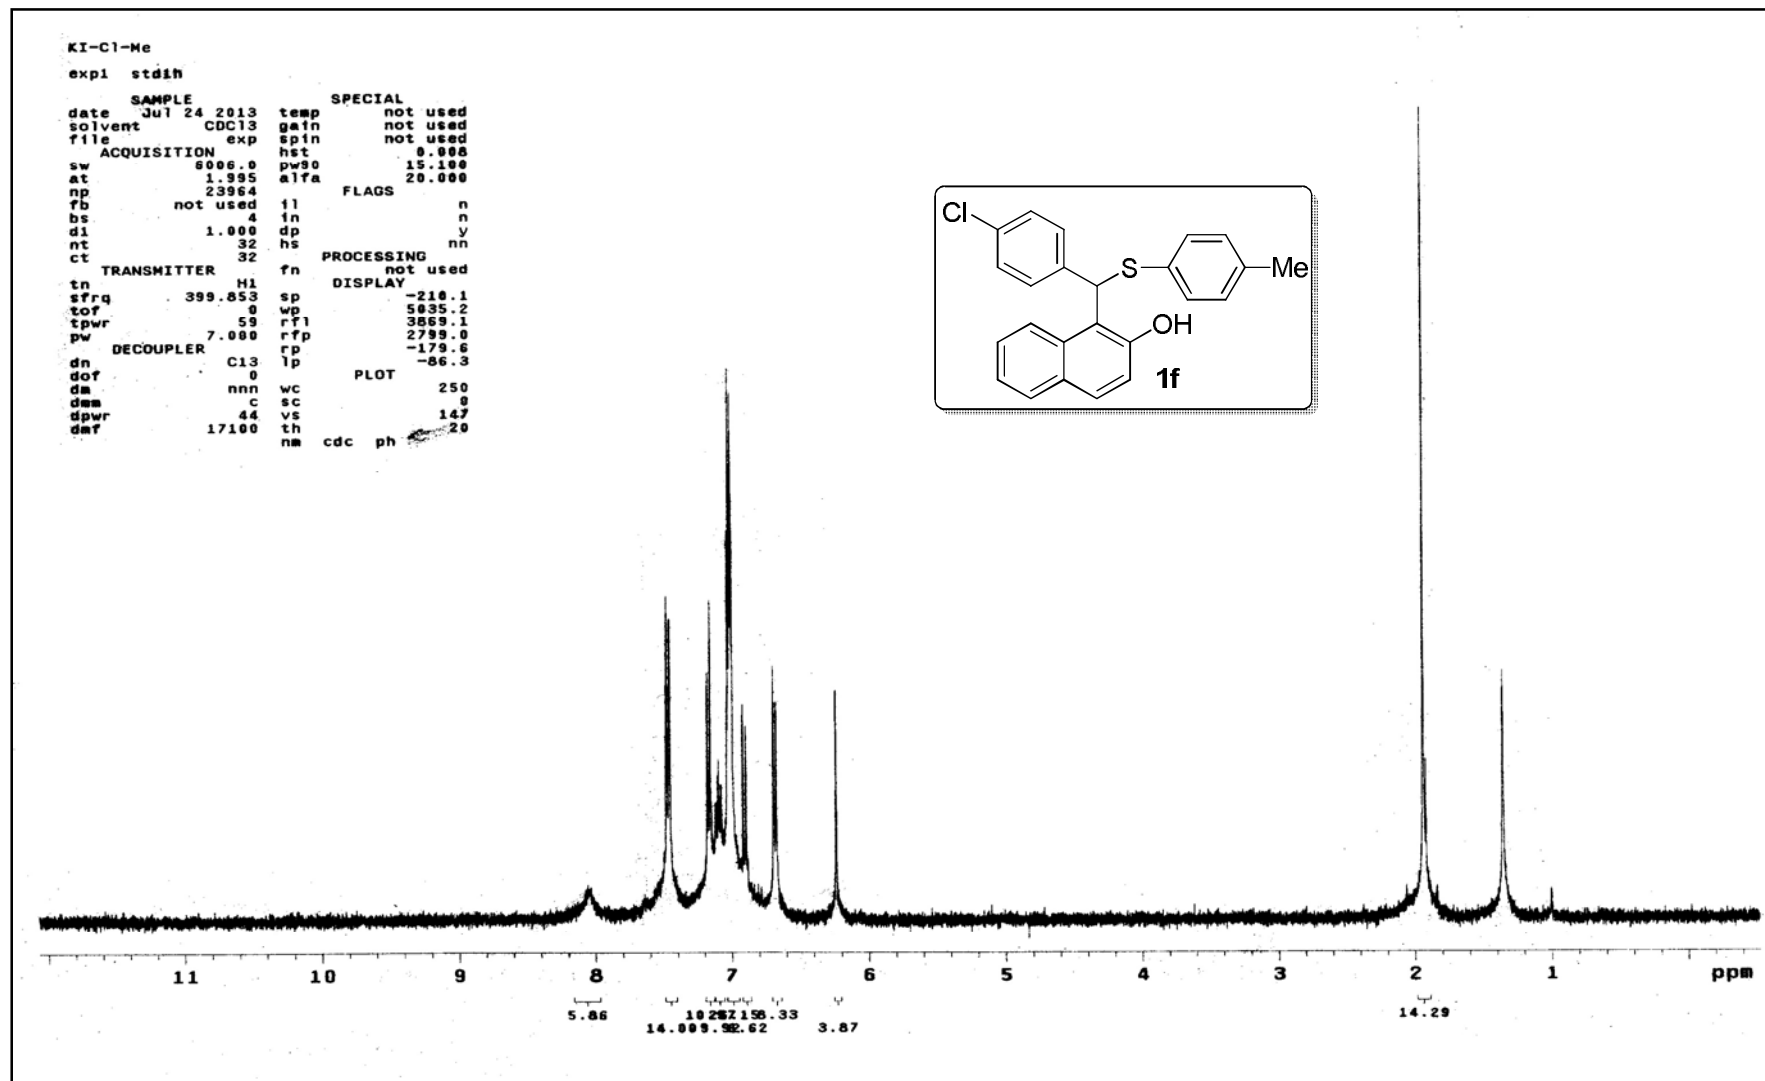



<sup>13</sup>C NMR spectra of 1f

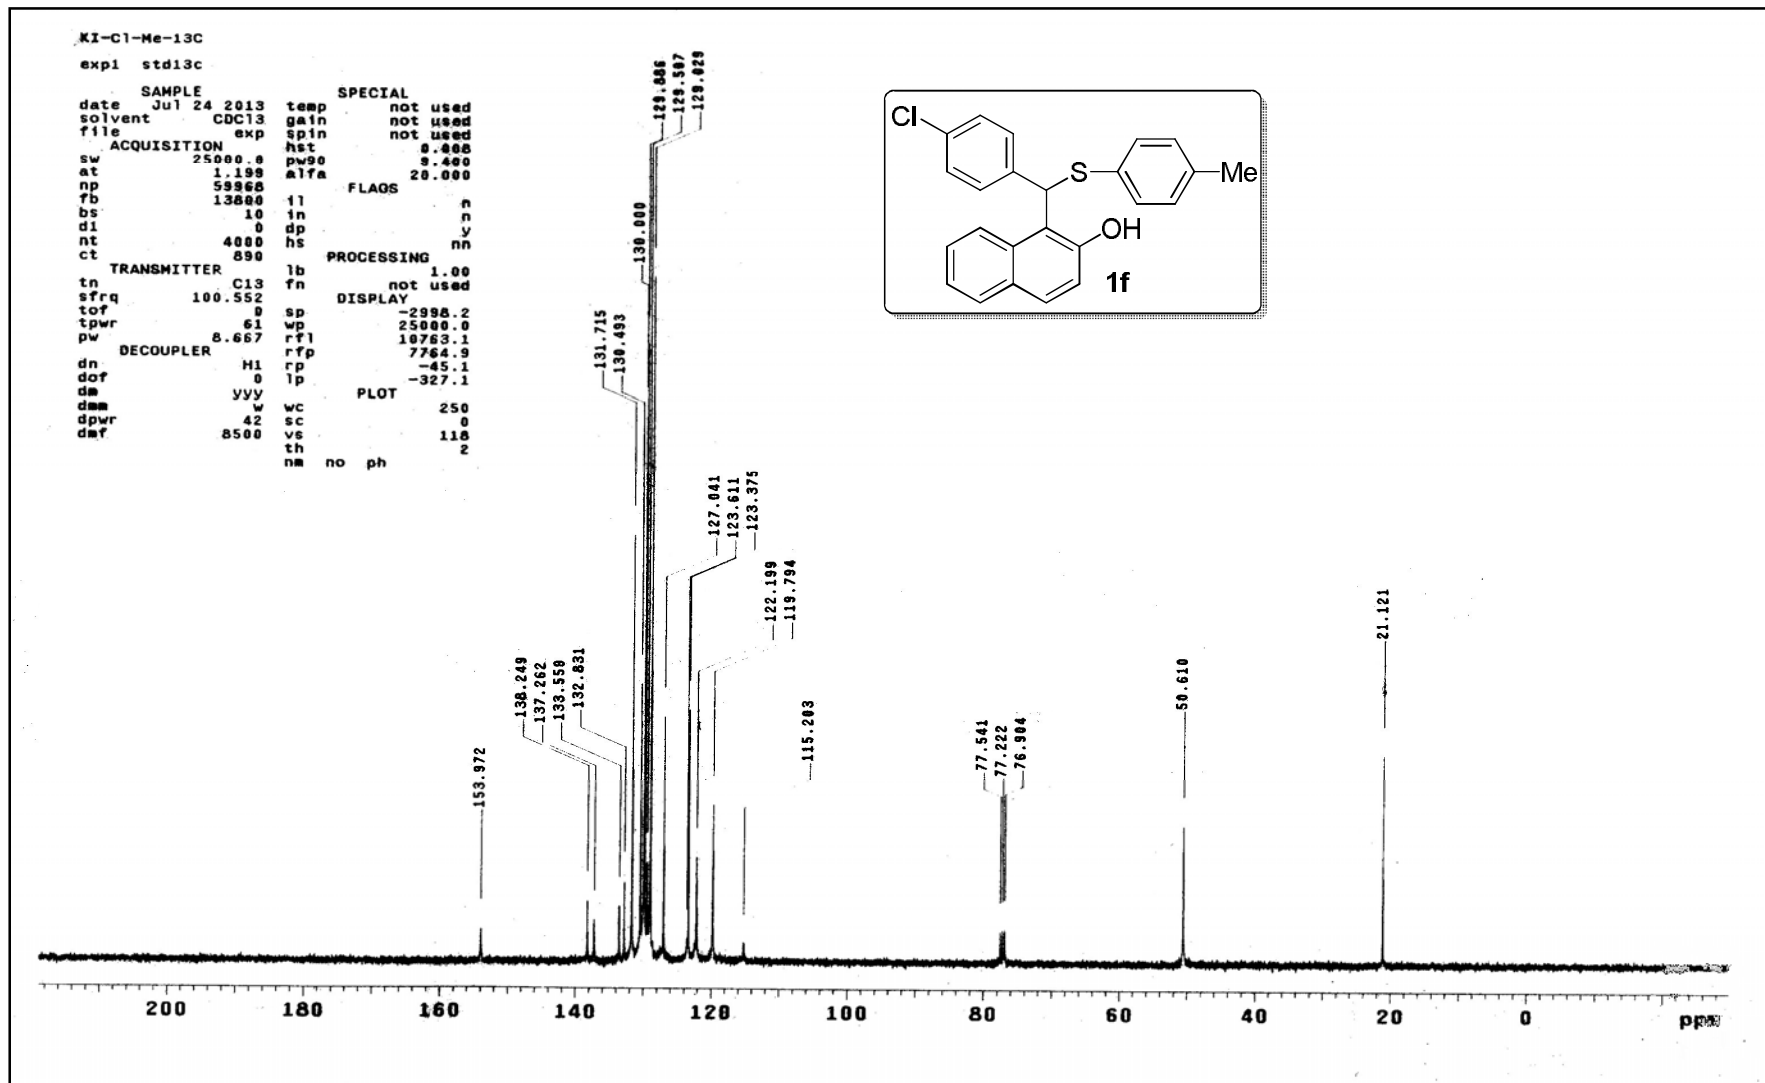

# <sup>1</sup>H NMR spectra of 1g

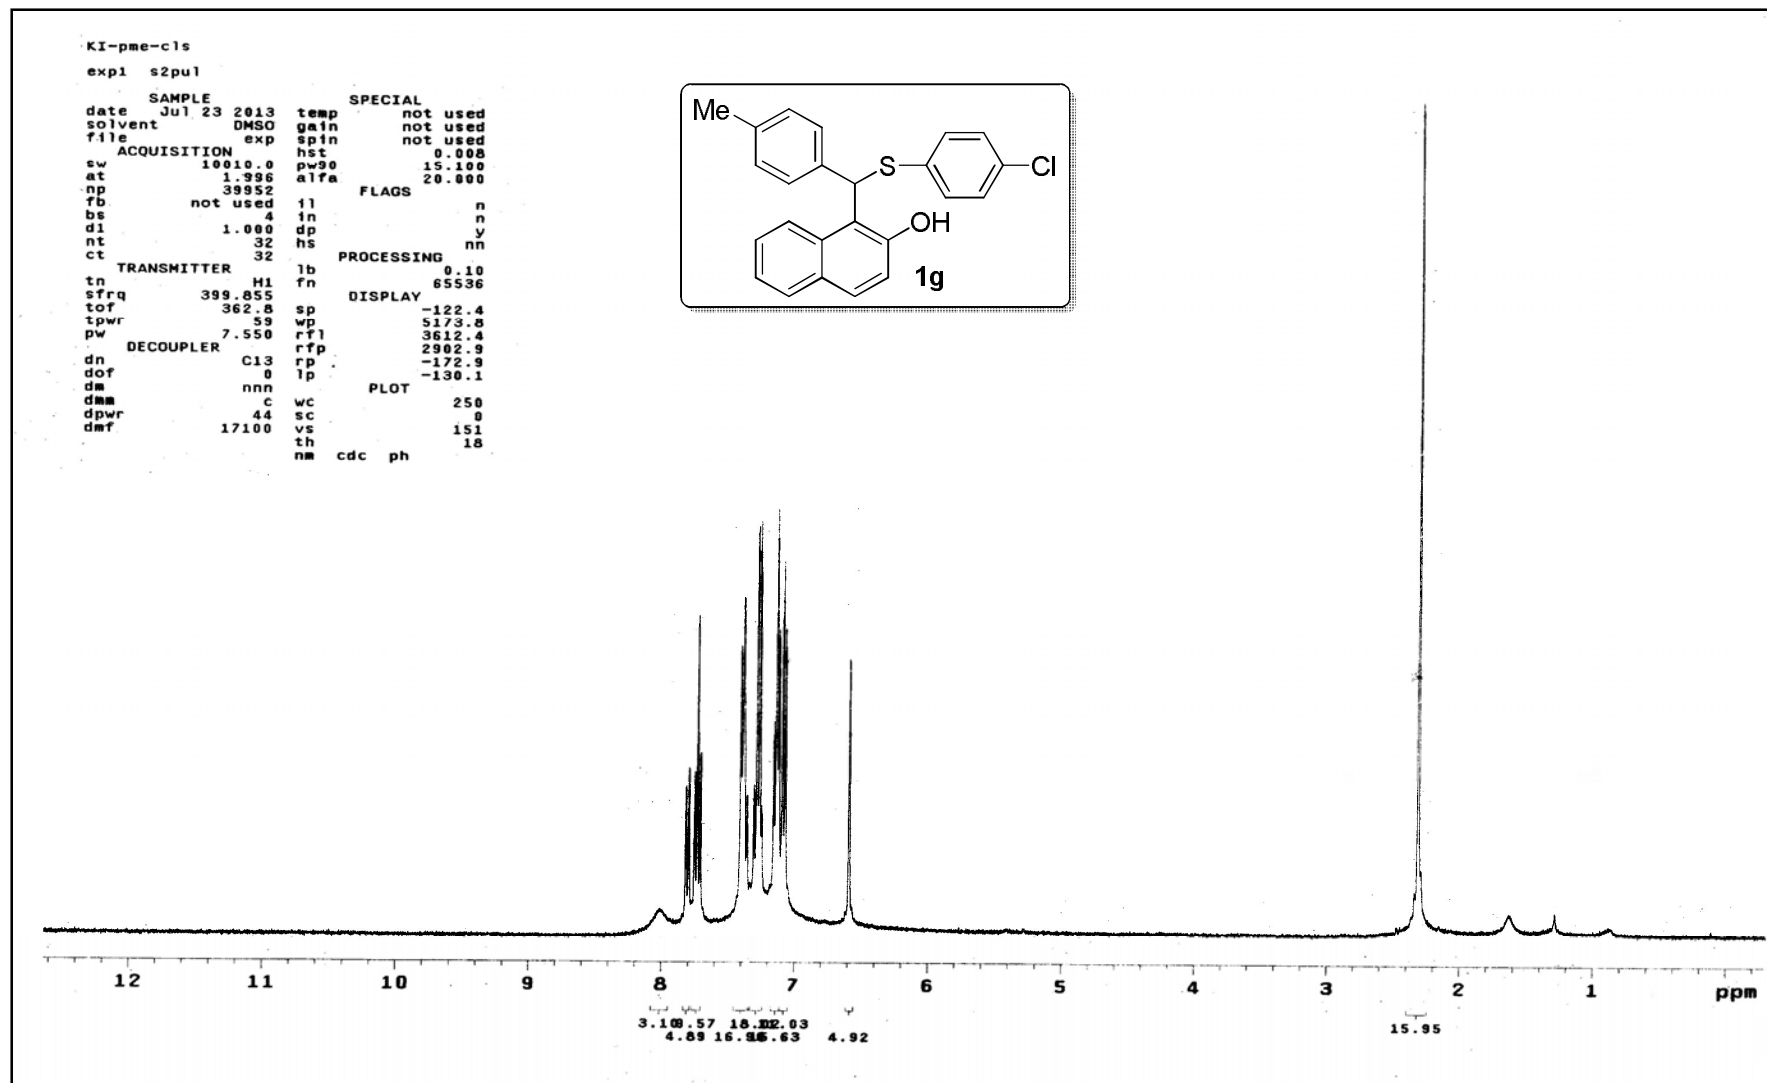

<sup>13</sup>C NMR spectra of 1g

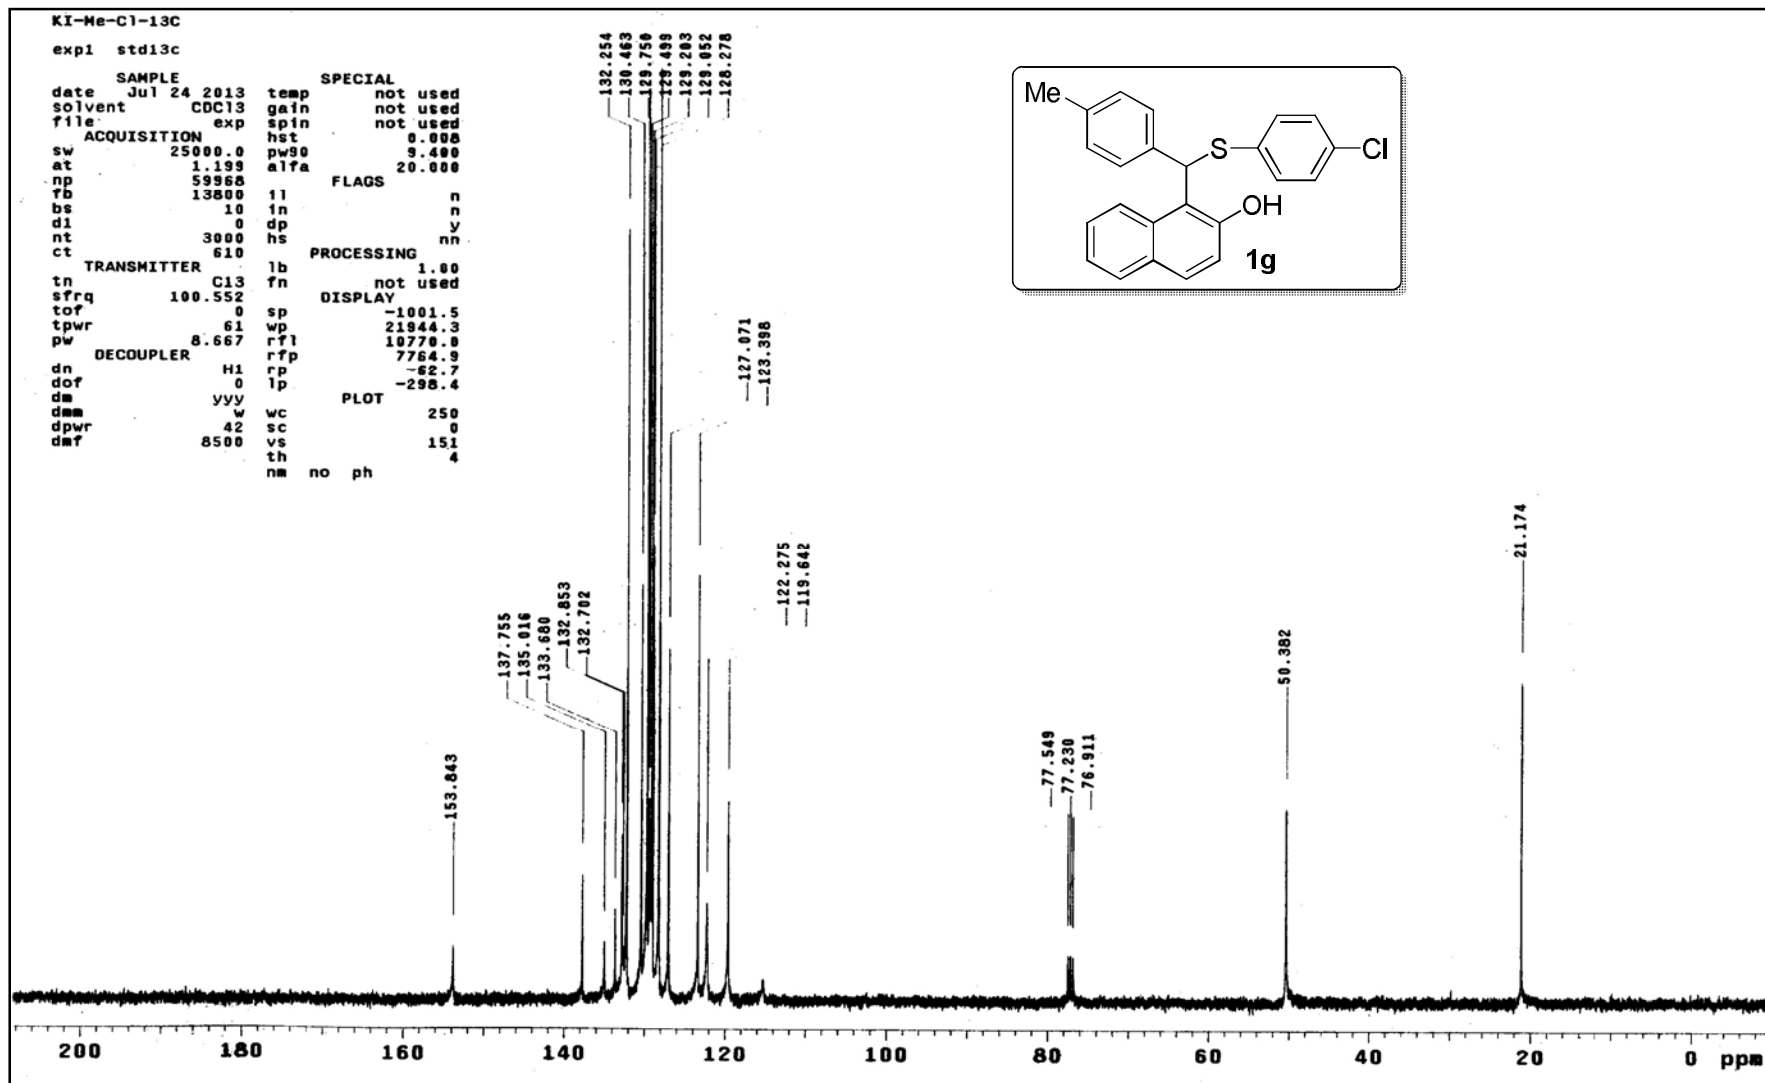

# <sup>1</sup>H NMR spectra of 1,2-di-*p*-tolylsulfane (6a)

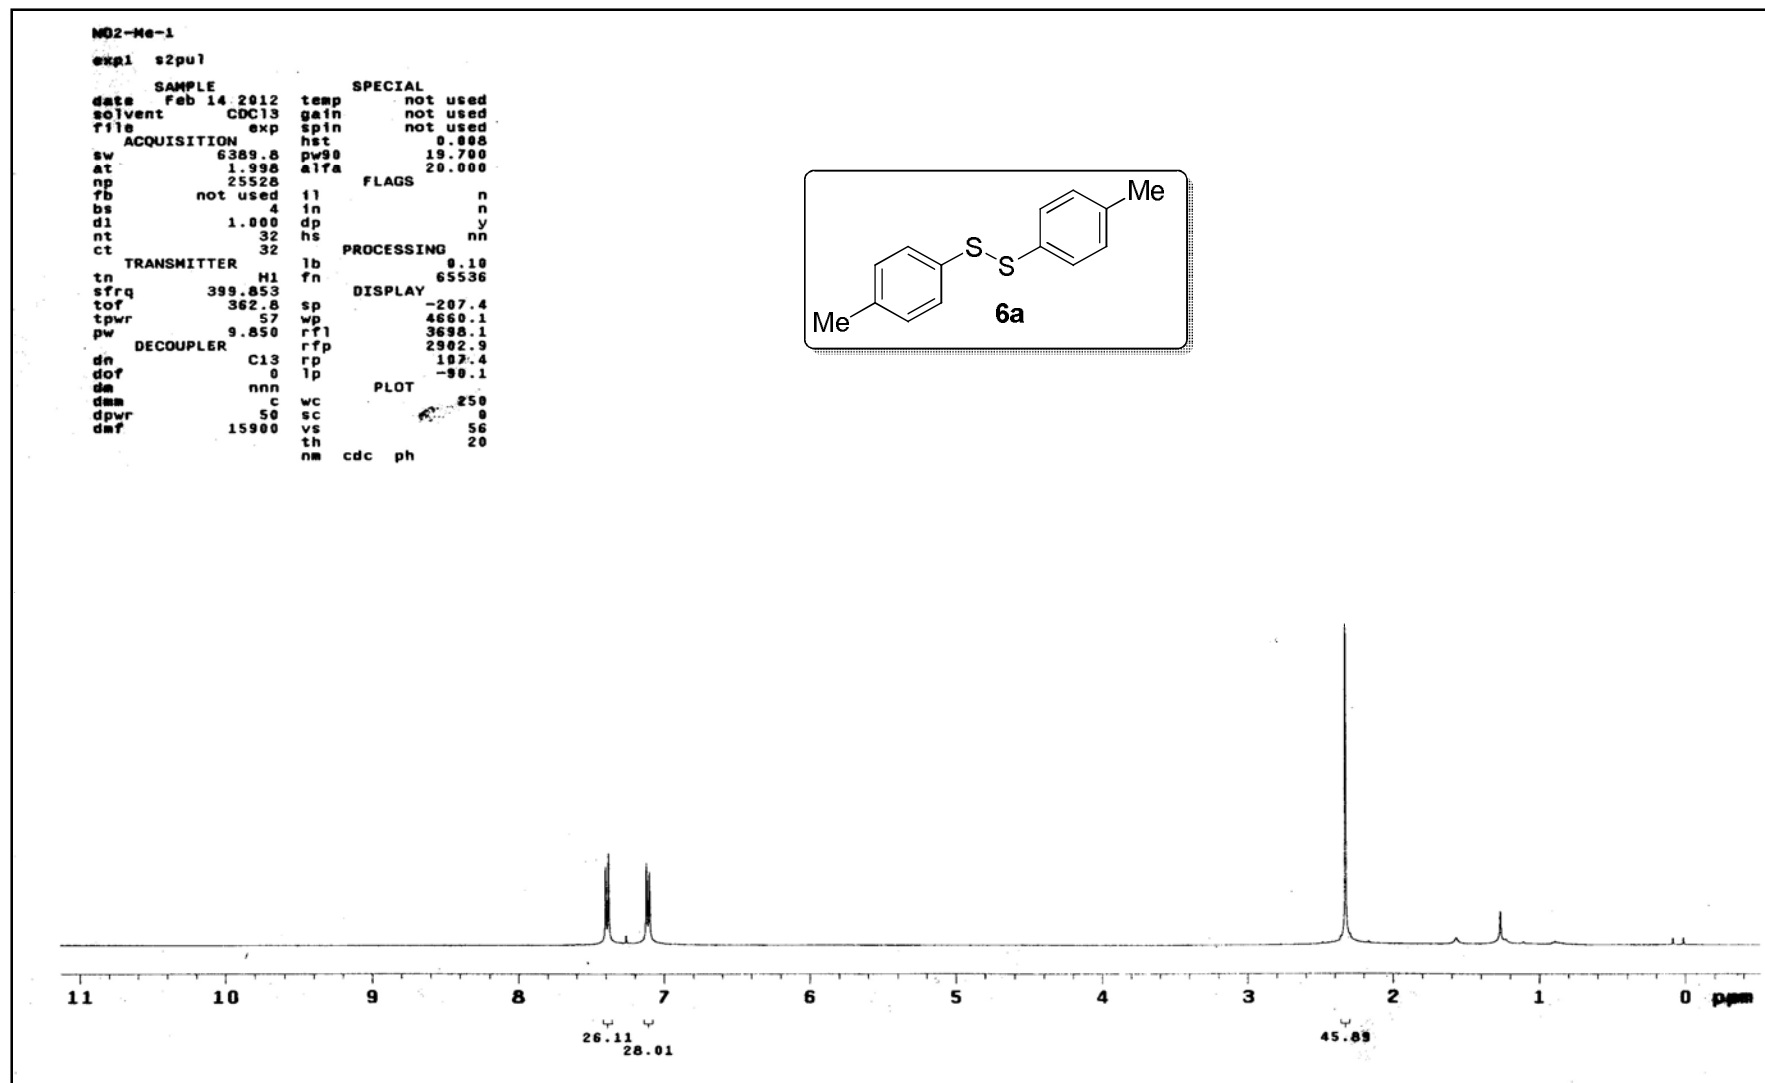

<sup>13</sup>C NMR spectra of 1,2-di-*p*-tolylsulfane (6a)

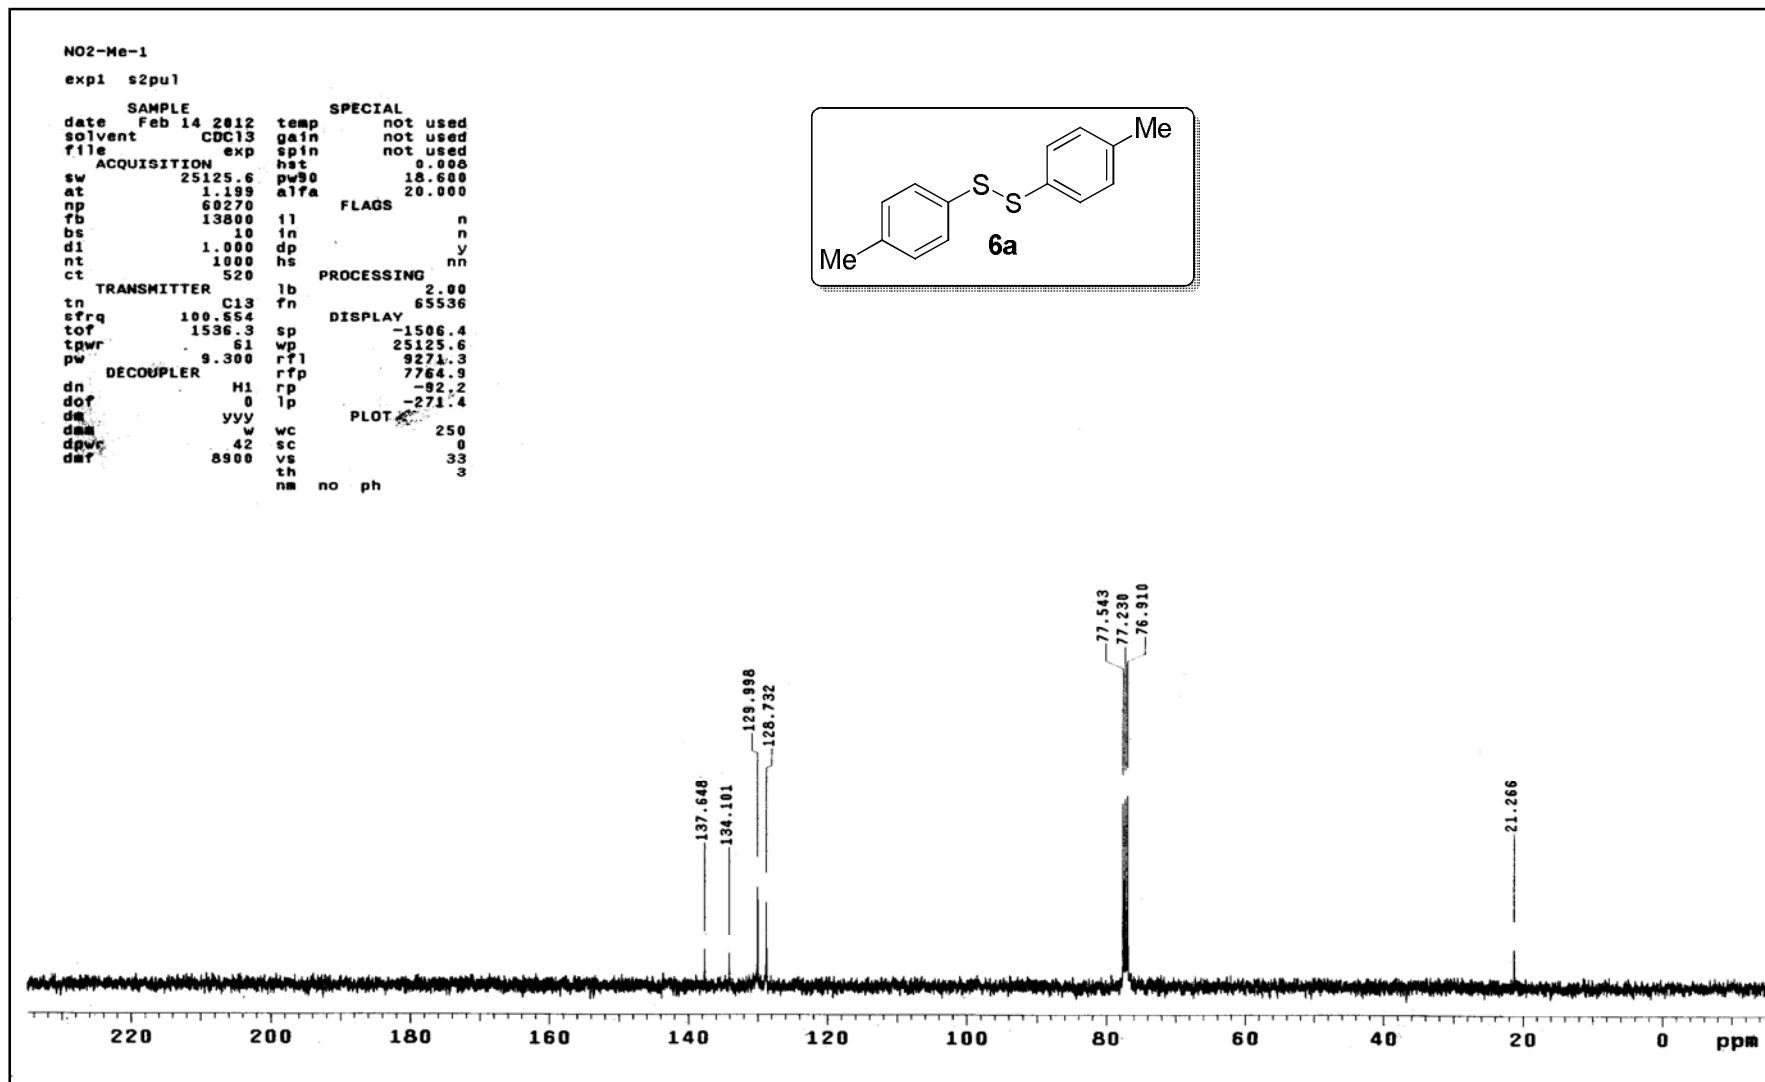

# <sup>1</sup>H NMR spectra of 3a

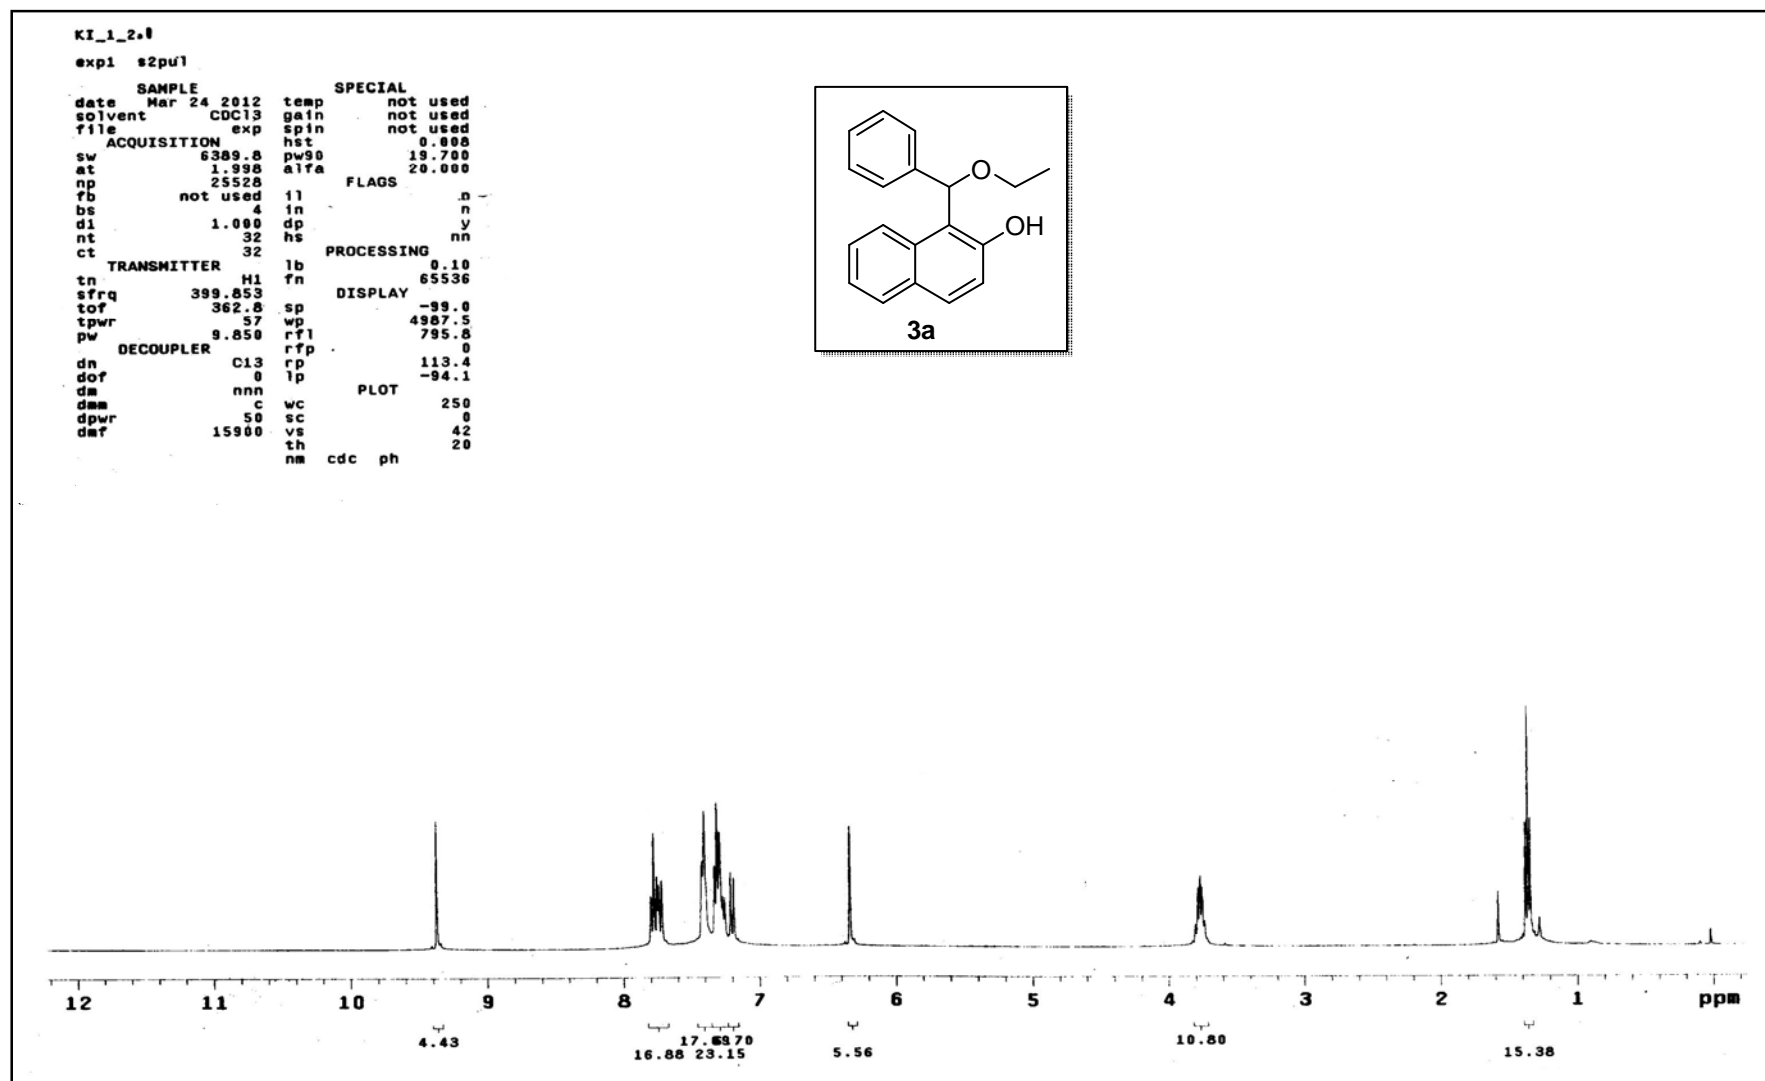

# <sup>13</sup>C NMR spectra of 3a

```
KI-1-2.1-13C
expi s2pu1
SAMPLE          SPECIAL
date   Mar 25 2012  temp   not used
solvent CDC13      gain   not used
file   exp         spin   not used
ACQUISITION    hst     0.008
sw      25125.6    pw90    18.600
at      1.199     alfa    20.000
np      60270
fb      13800    fl     FLAGS
bs      10       in     n
di      1.000    dp     y
nt      5000    hs     nn
ct      1460
TRANSMITTER    lb     2.00
tn      C13     fn     65536
sfrq     100.554  sp     DISPLAY
tof      1536.3  wp     -1506.4
tpwr     61     rfp    25125.6
pw      9.300   rfl    9271.3
DECOUPLER     rf     7764.9
dn      H1     rp     -87.9
dof      0     lp     -271.4
dm      yyv
dmm      w     wc     250
dpwr     42    sc     0
dmf      8900  vs     34
nm      no    ph     3
```

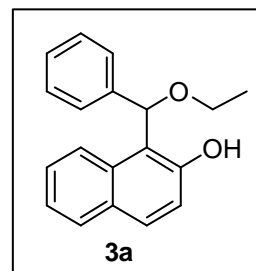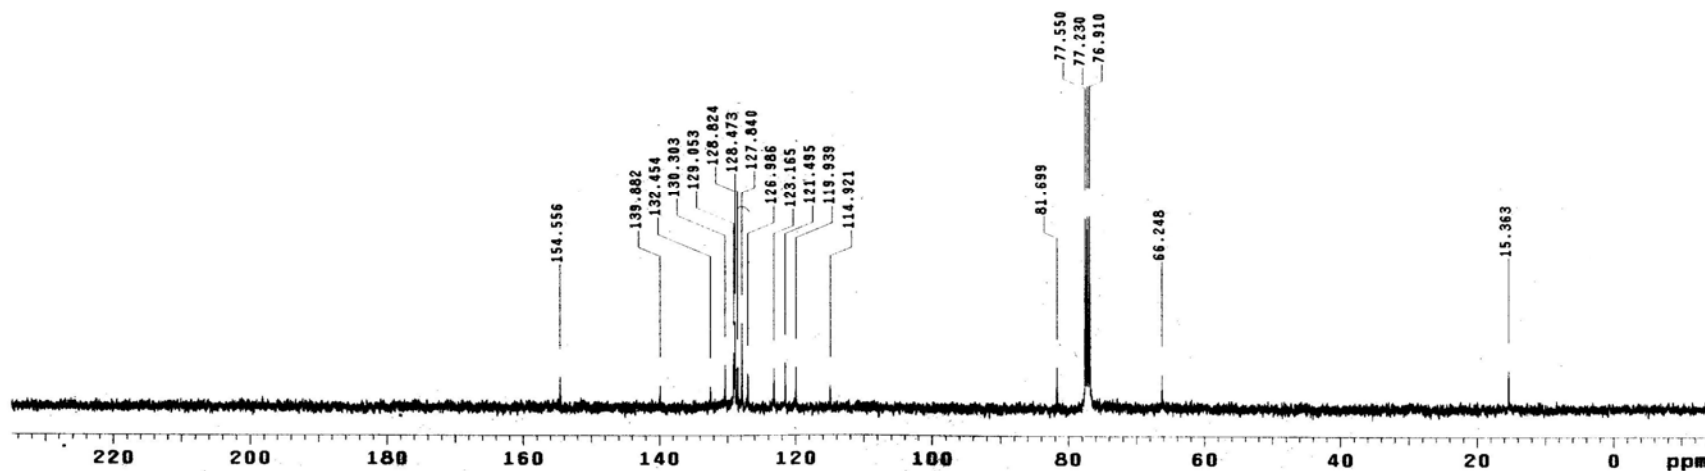

# <sup>1</sup>H NMR spectra of 3b

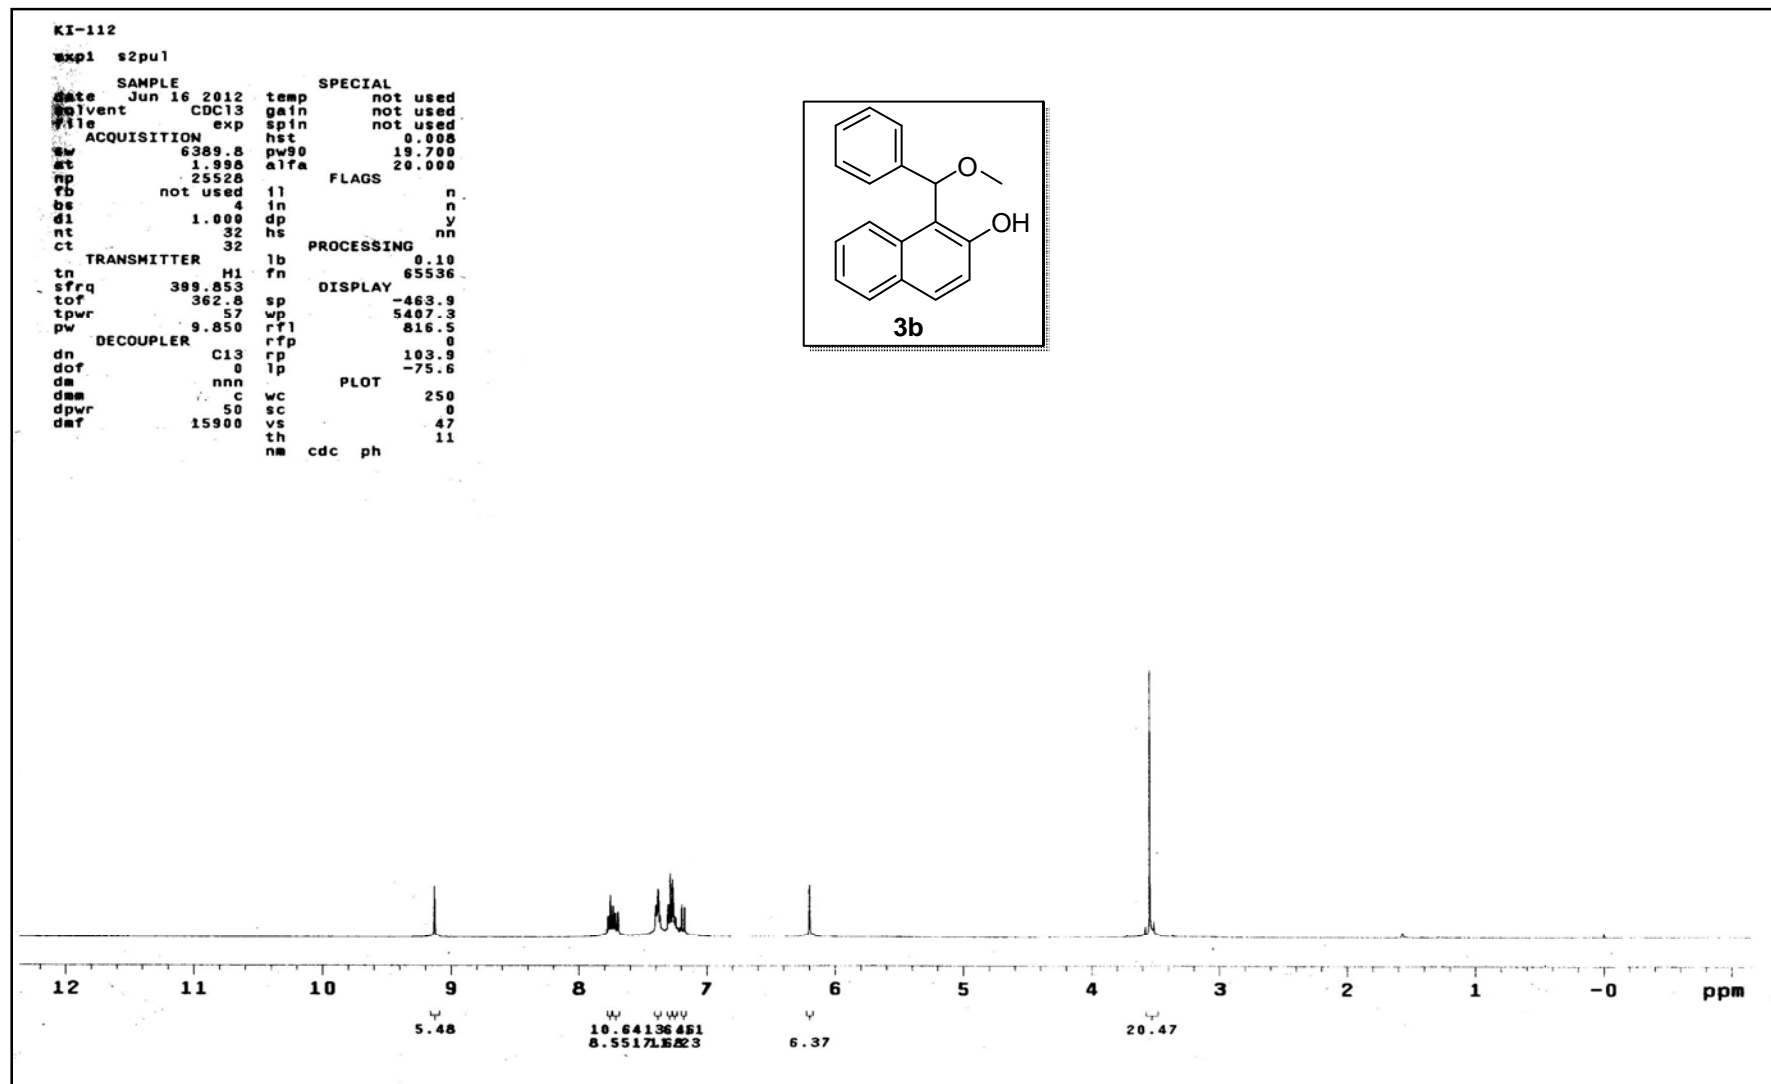



<sup>13</sup>C NMR Spectra of 3b

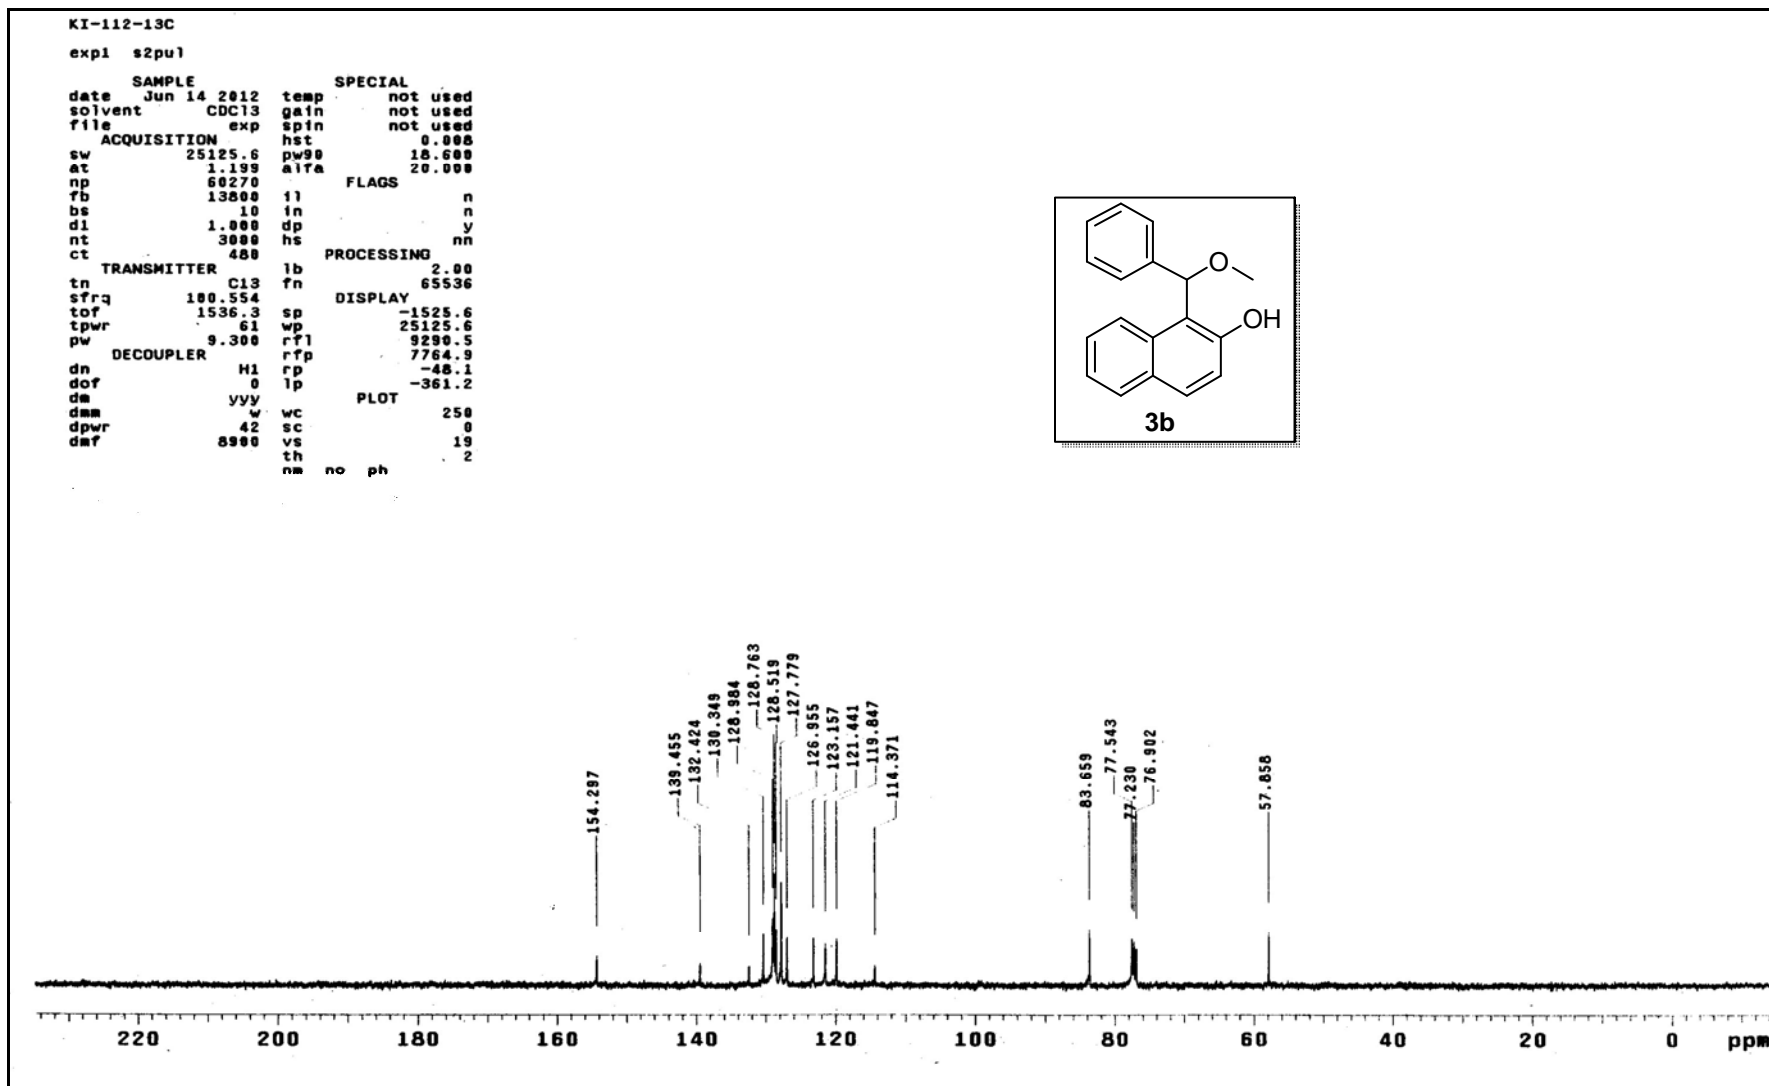

MS spectra of 3b

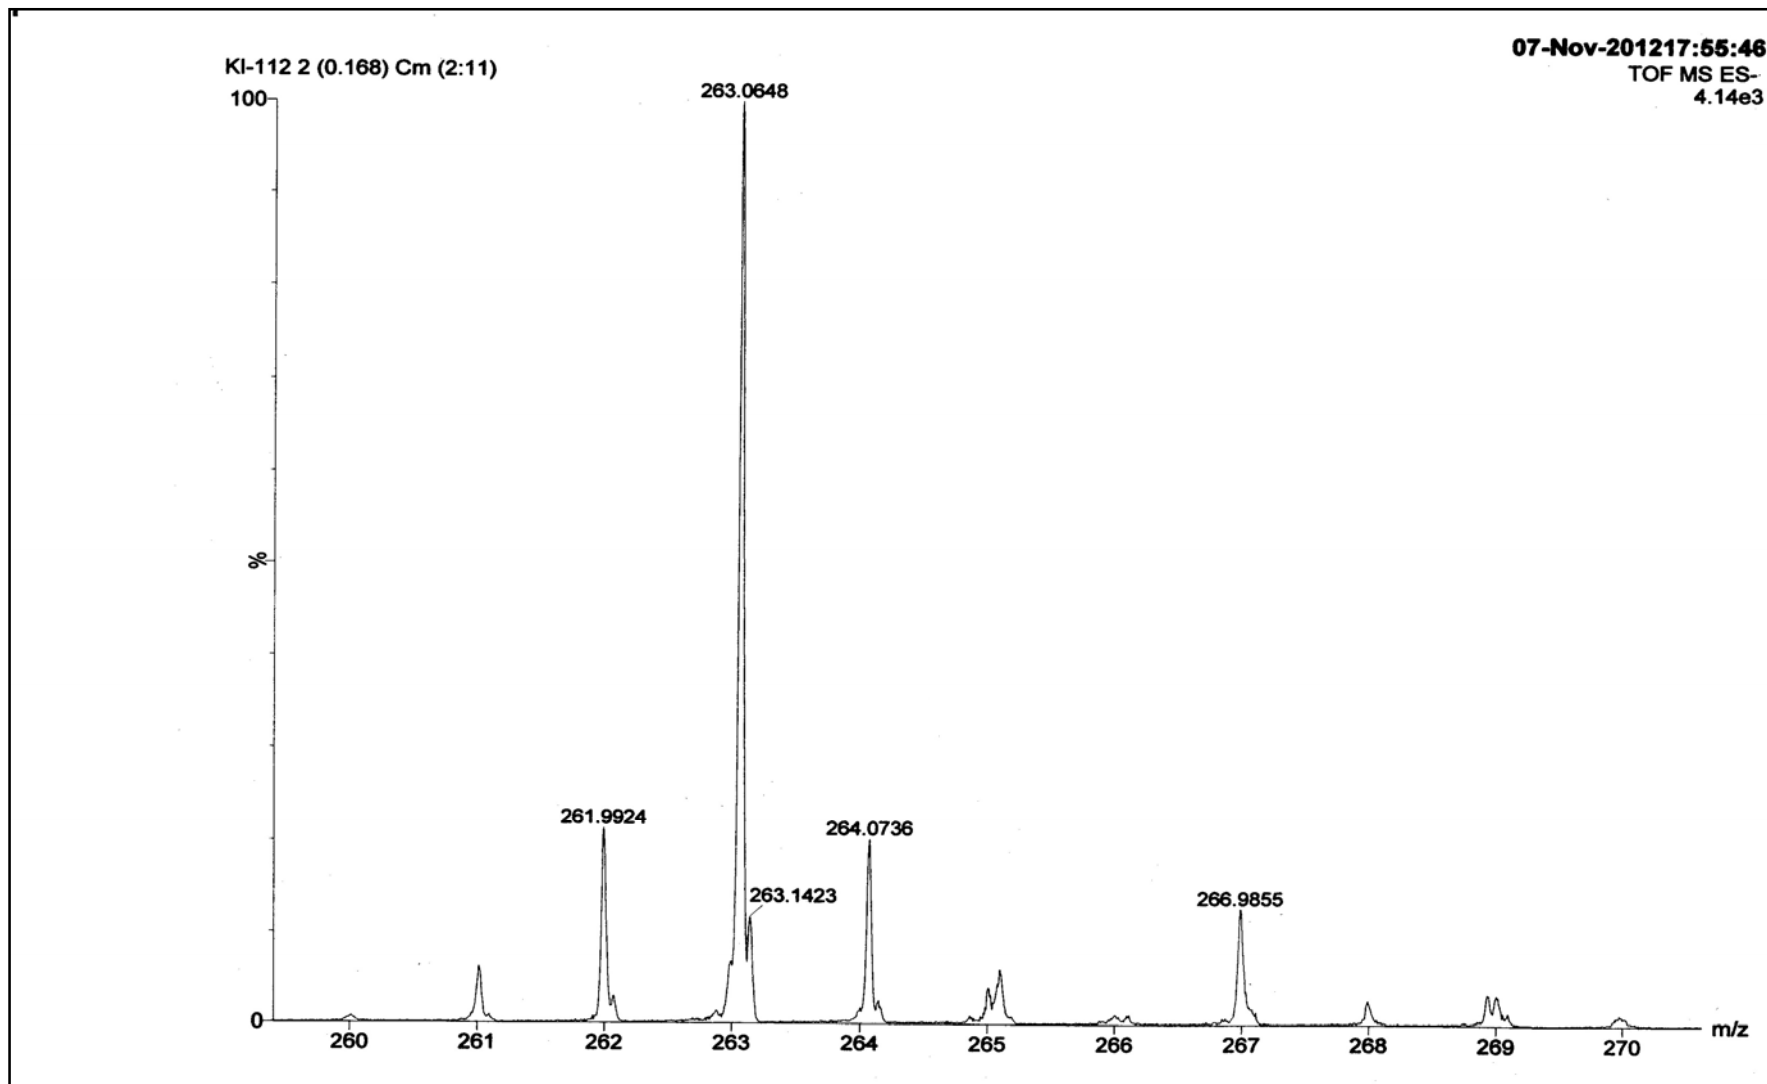

# <sup>1</sup>H NMR spectra of 3c

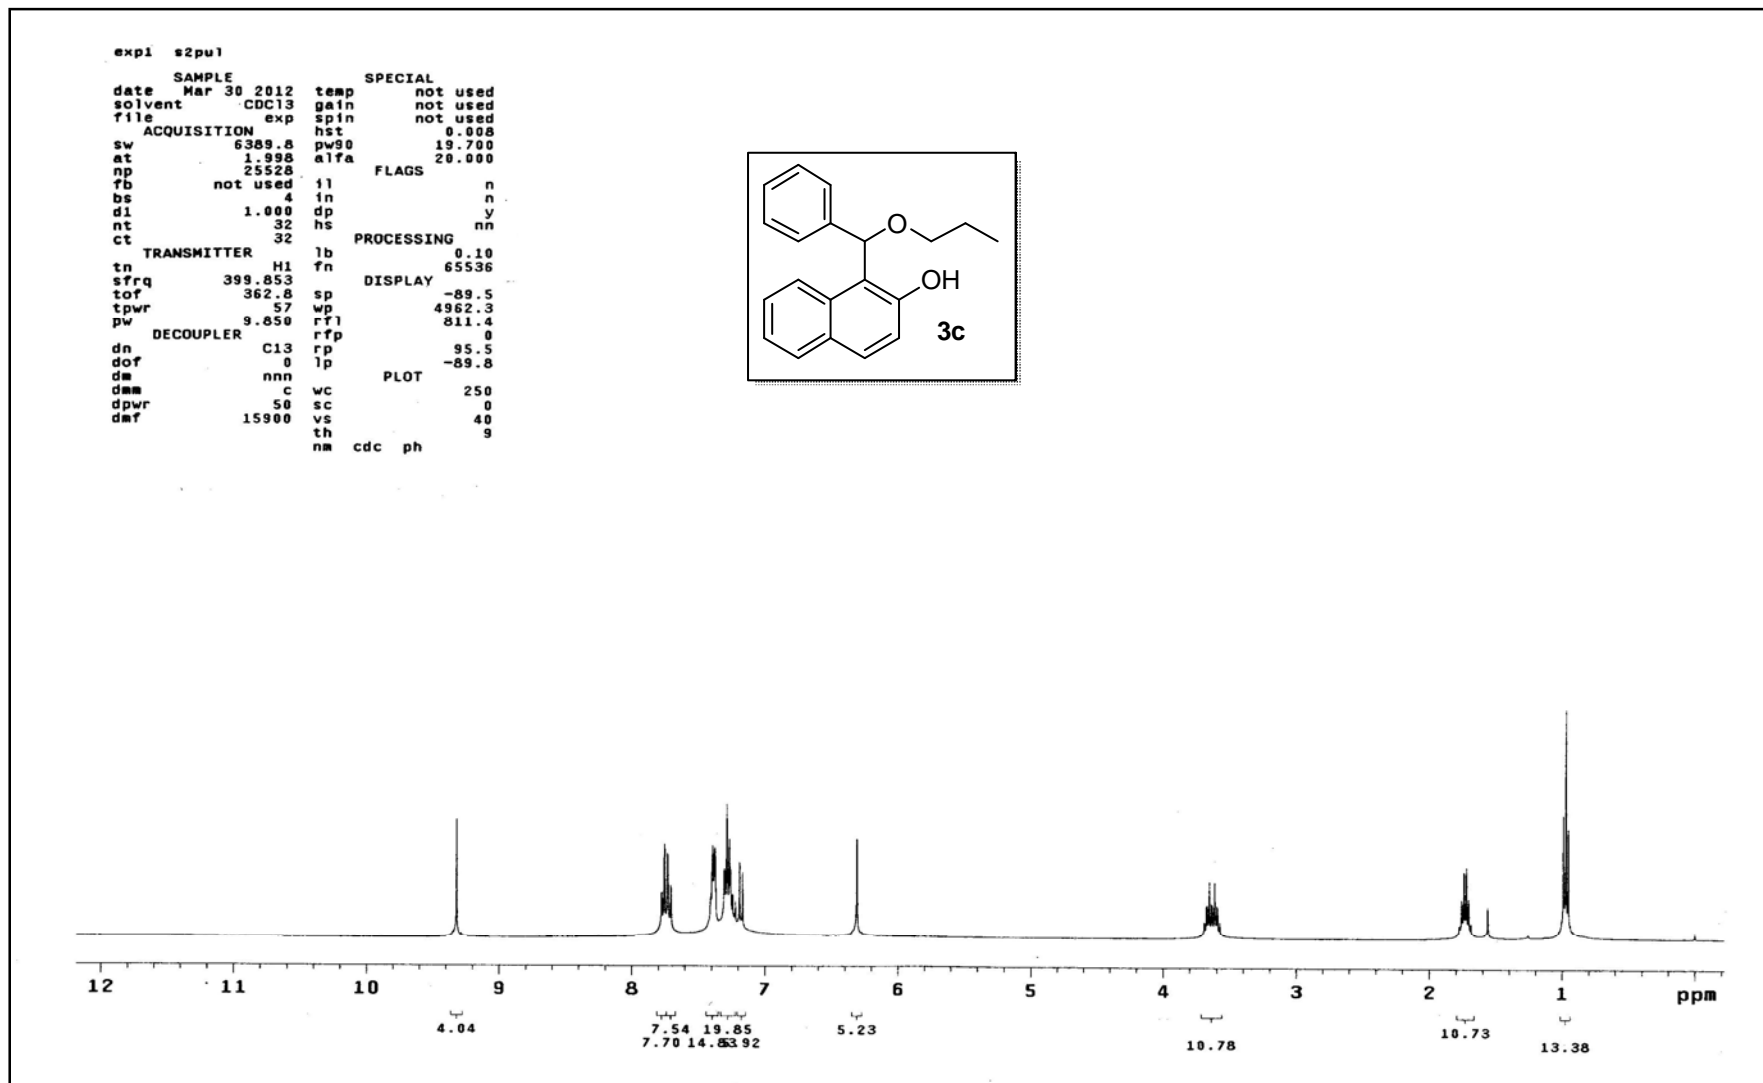

# <sup>13</sup>C NMR Spectra of 3c

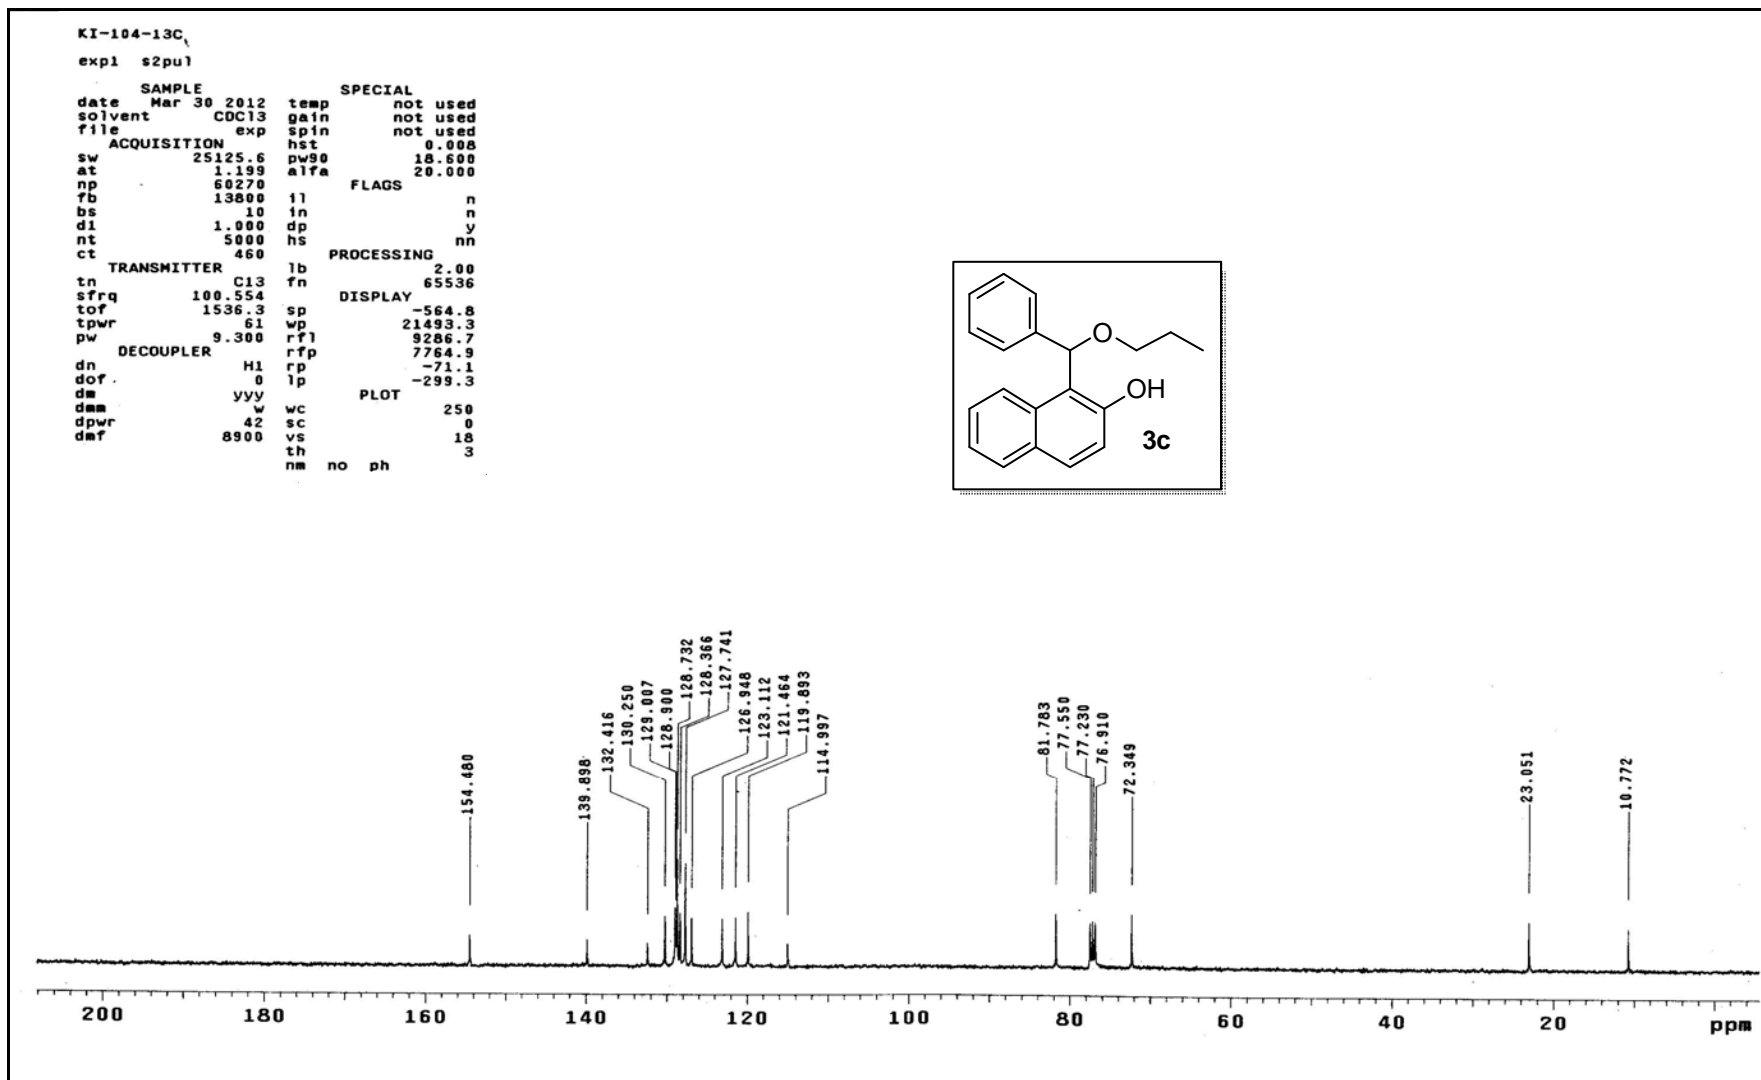

MS spectra of 3c

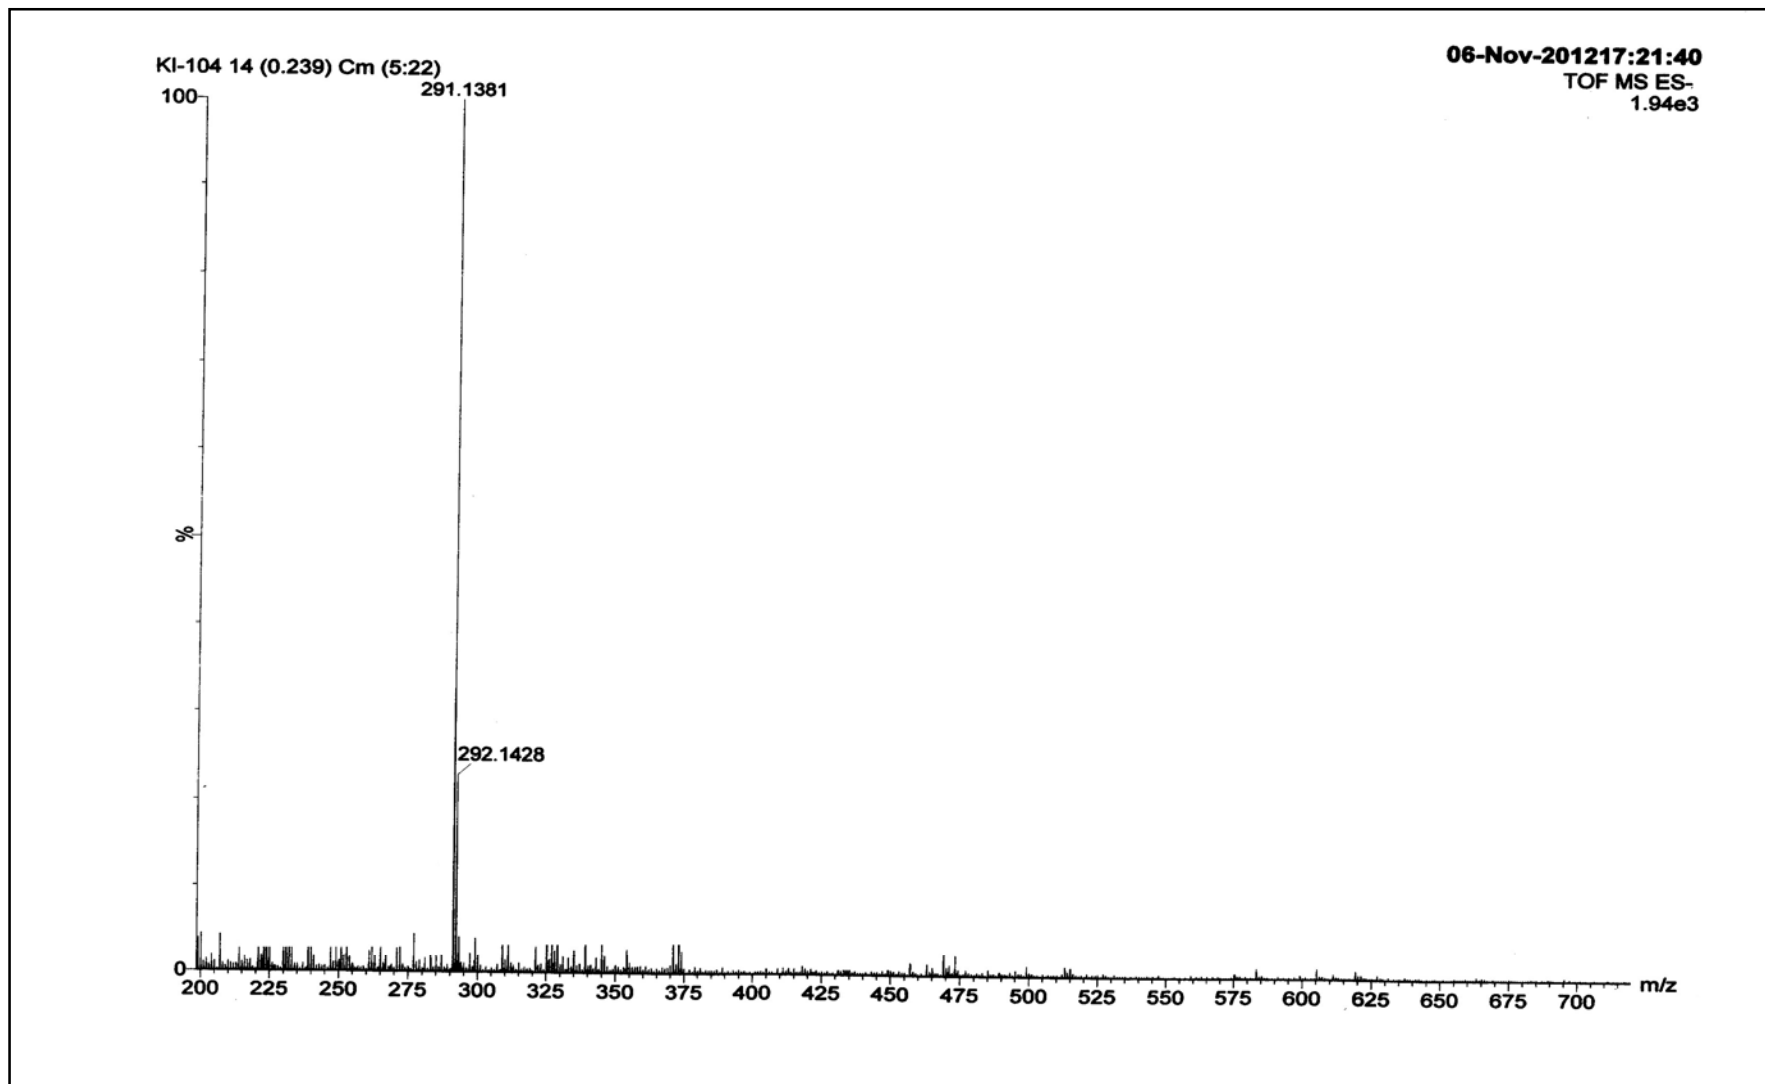

# <sup>1</sup>H NMR spectra of 3d

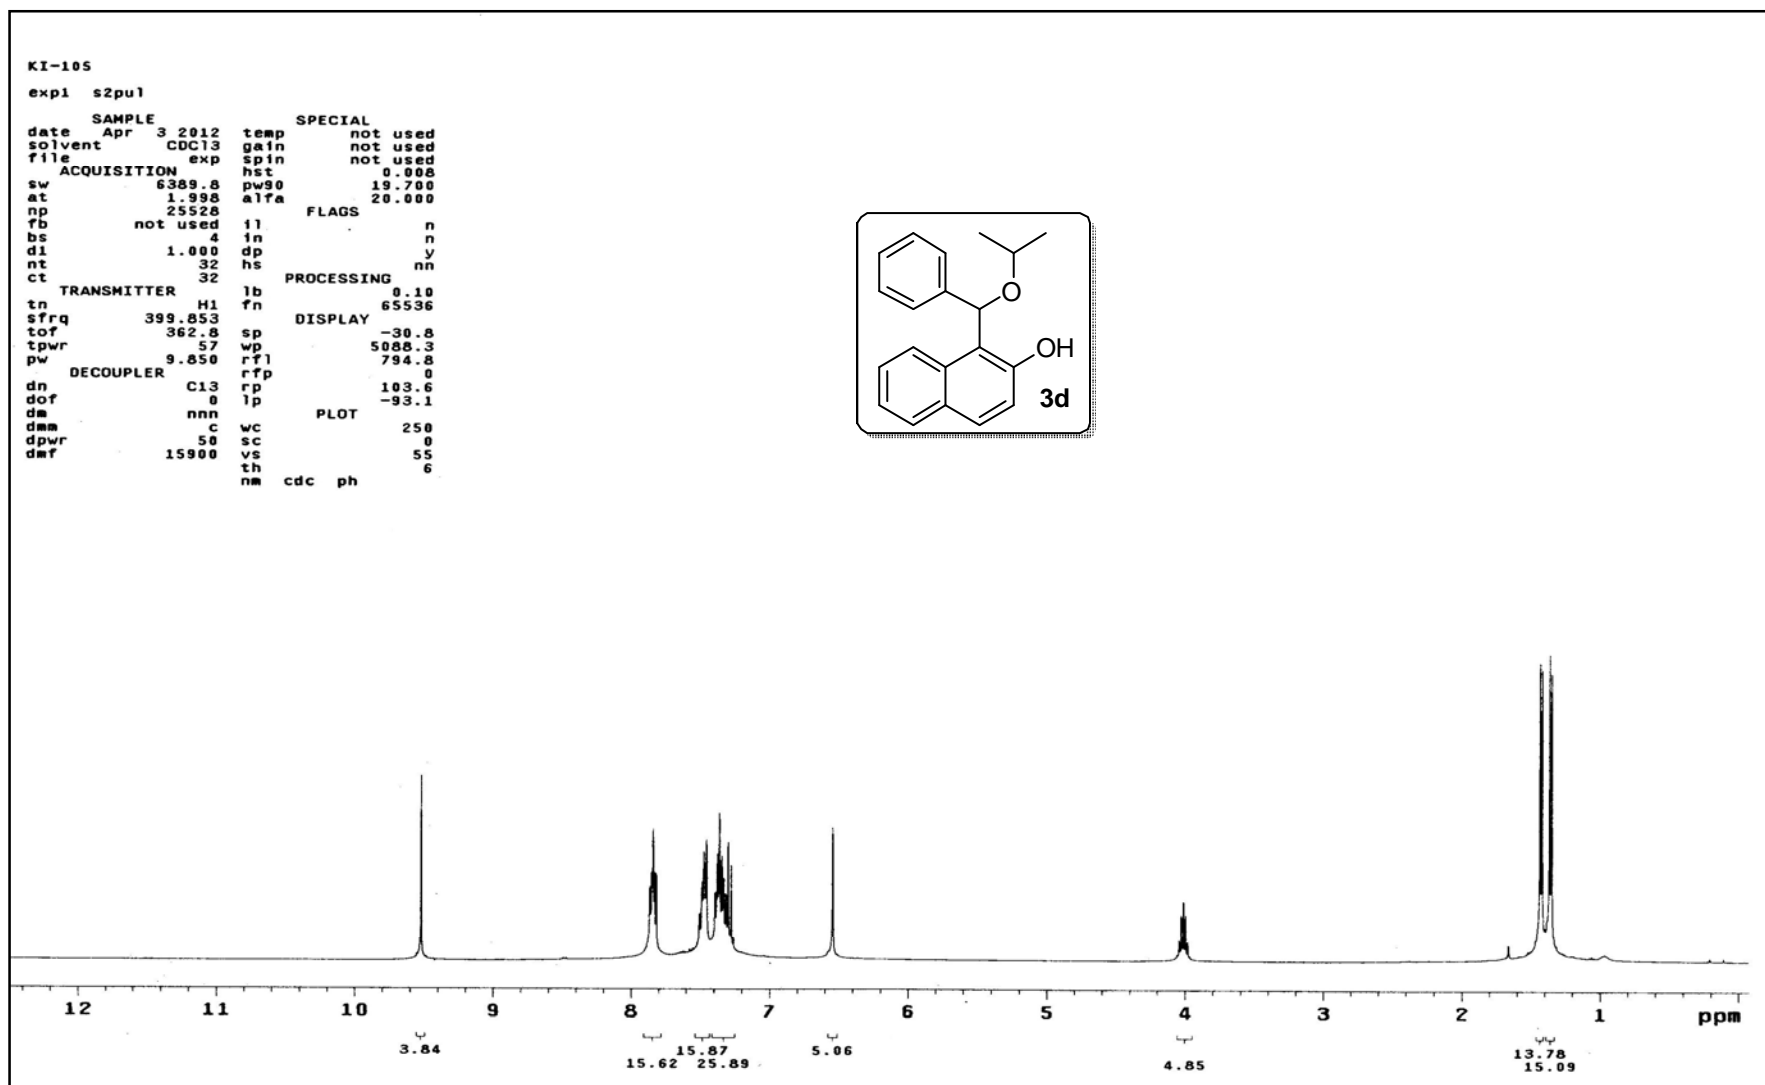

<sup>13</sup>C NMR Spectra of 3d

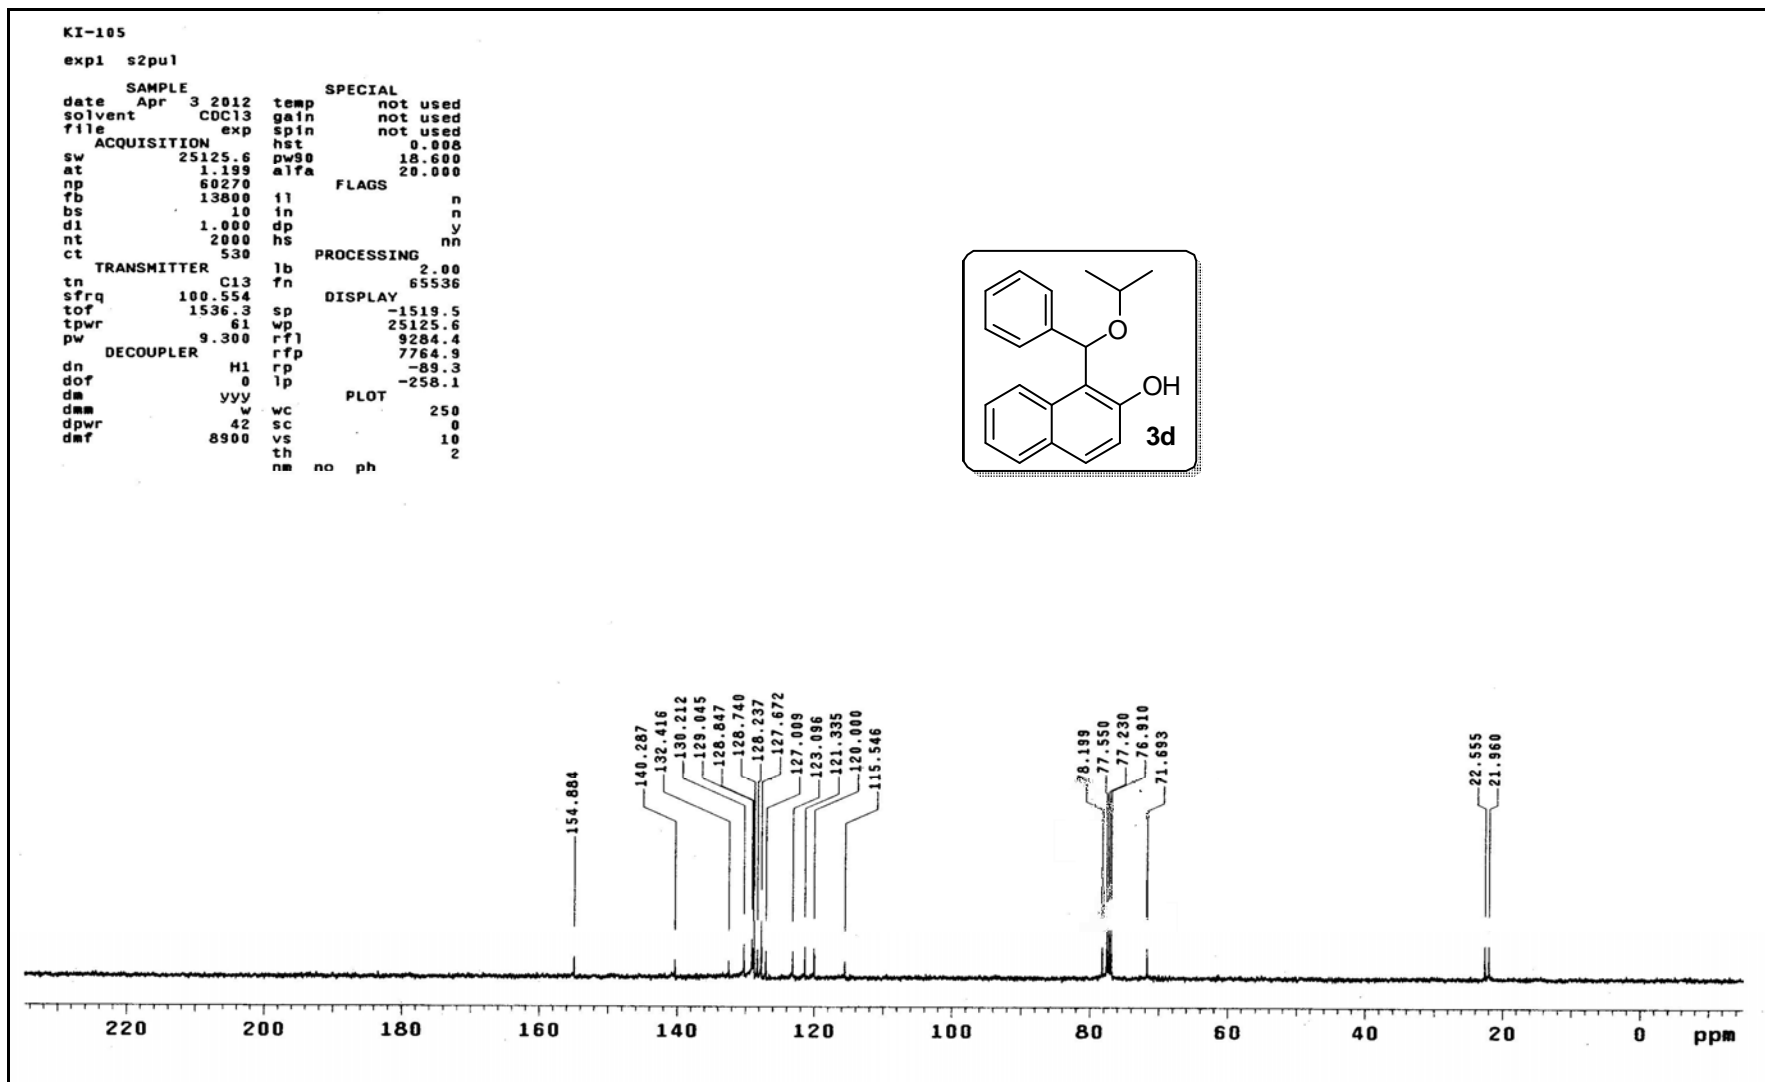

# <sup>1</sup>H NMR spectra of 3e

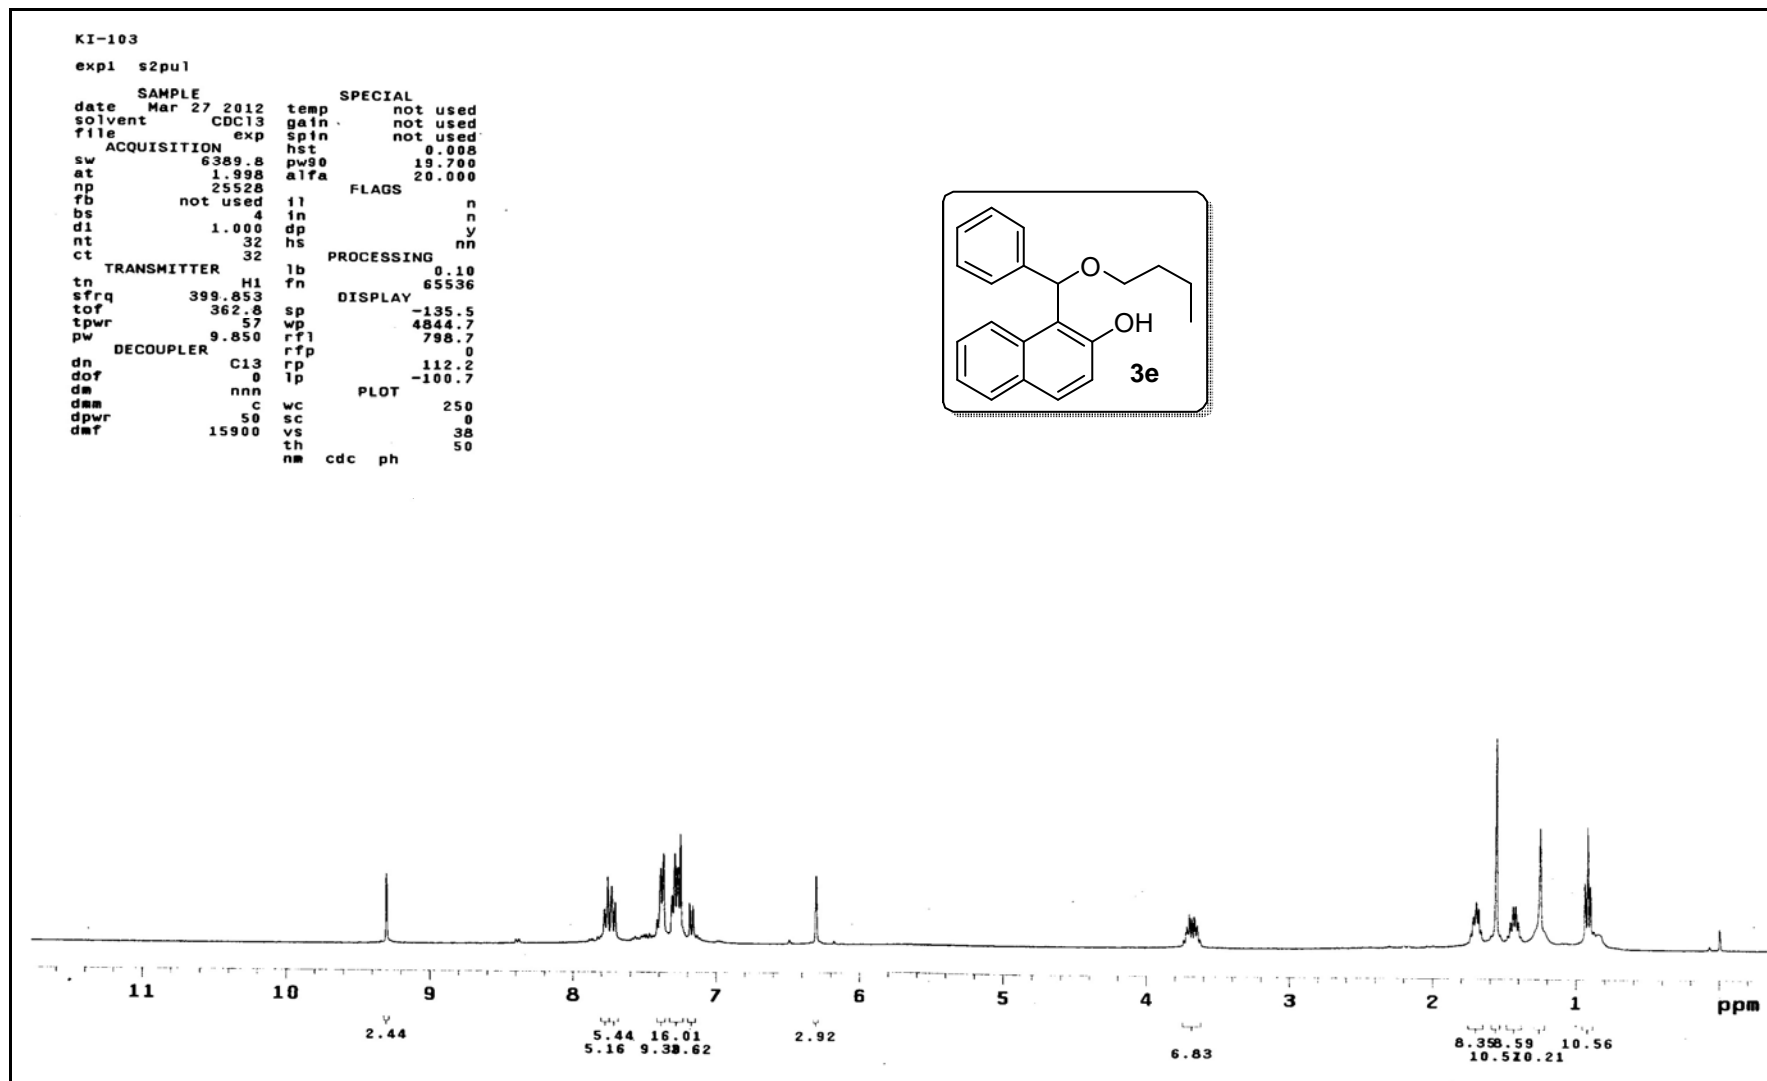



# <sup>13</sup>C NMR Spectra of 3e

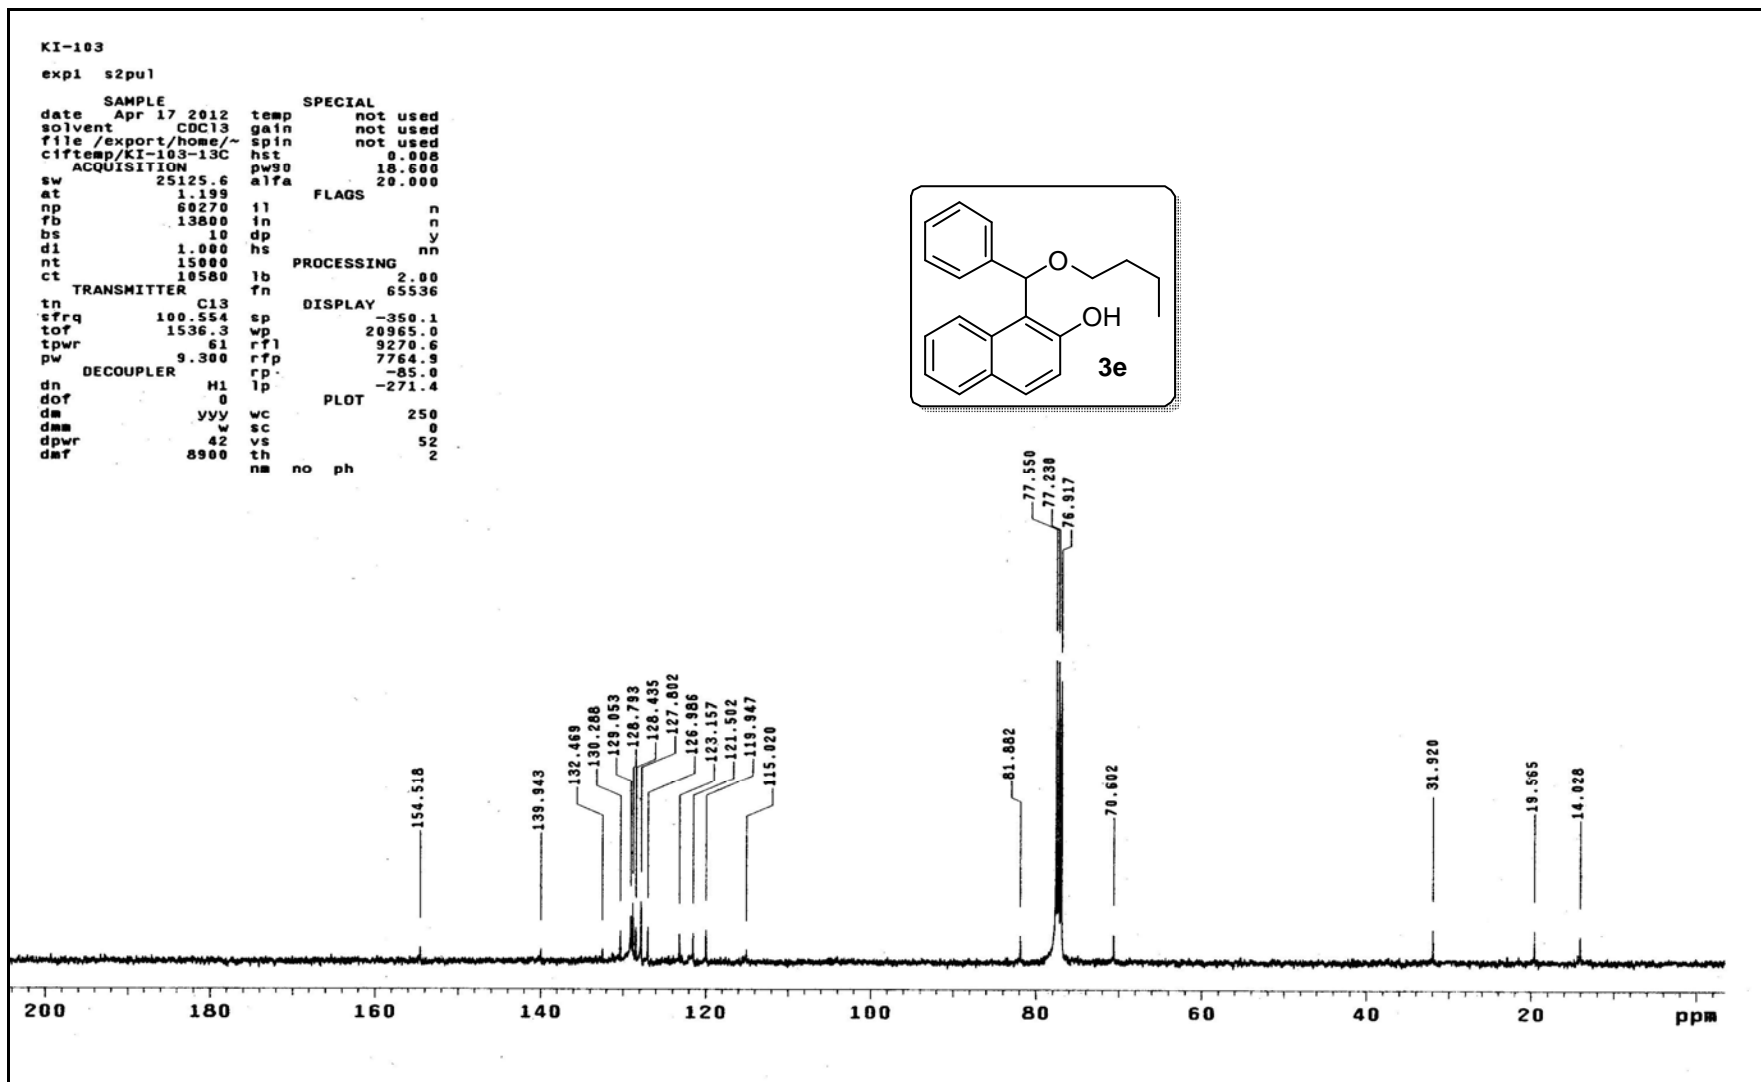

# <sup>1</sup>H NMR spectra of 3f

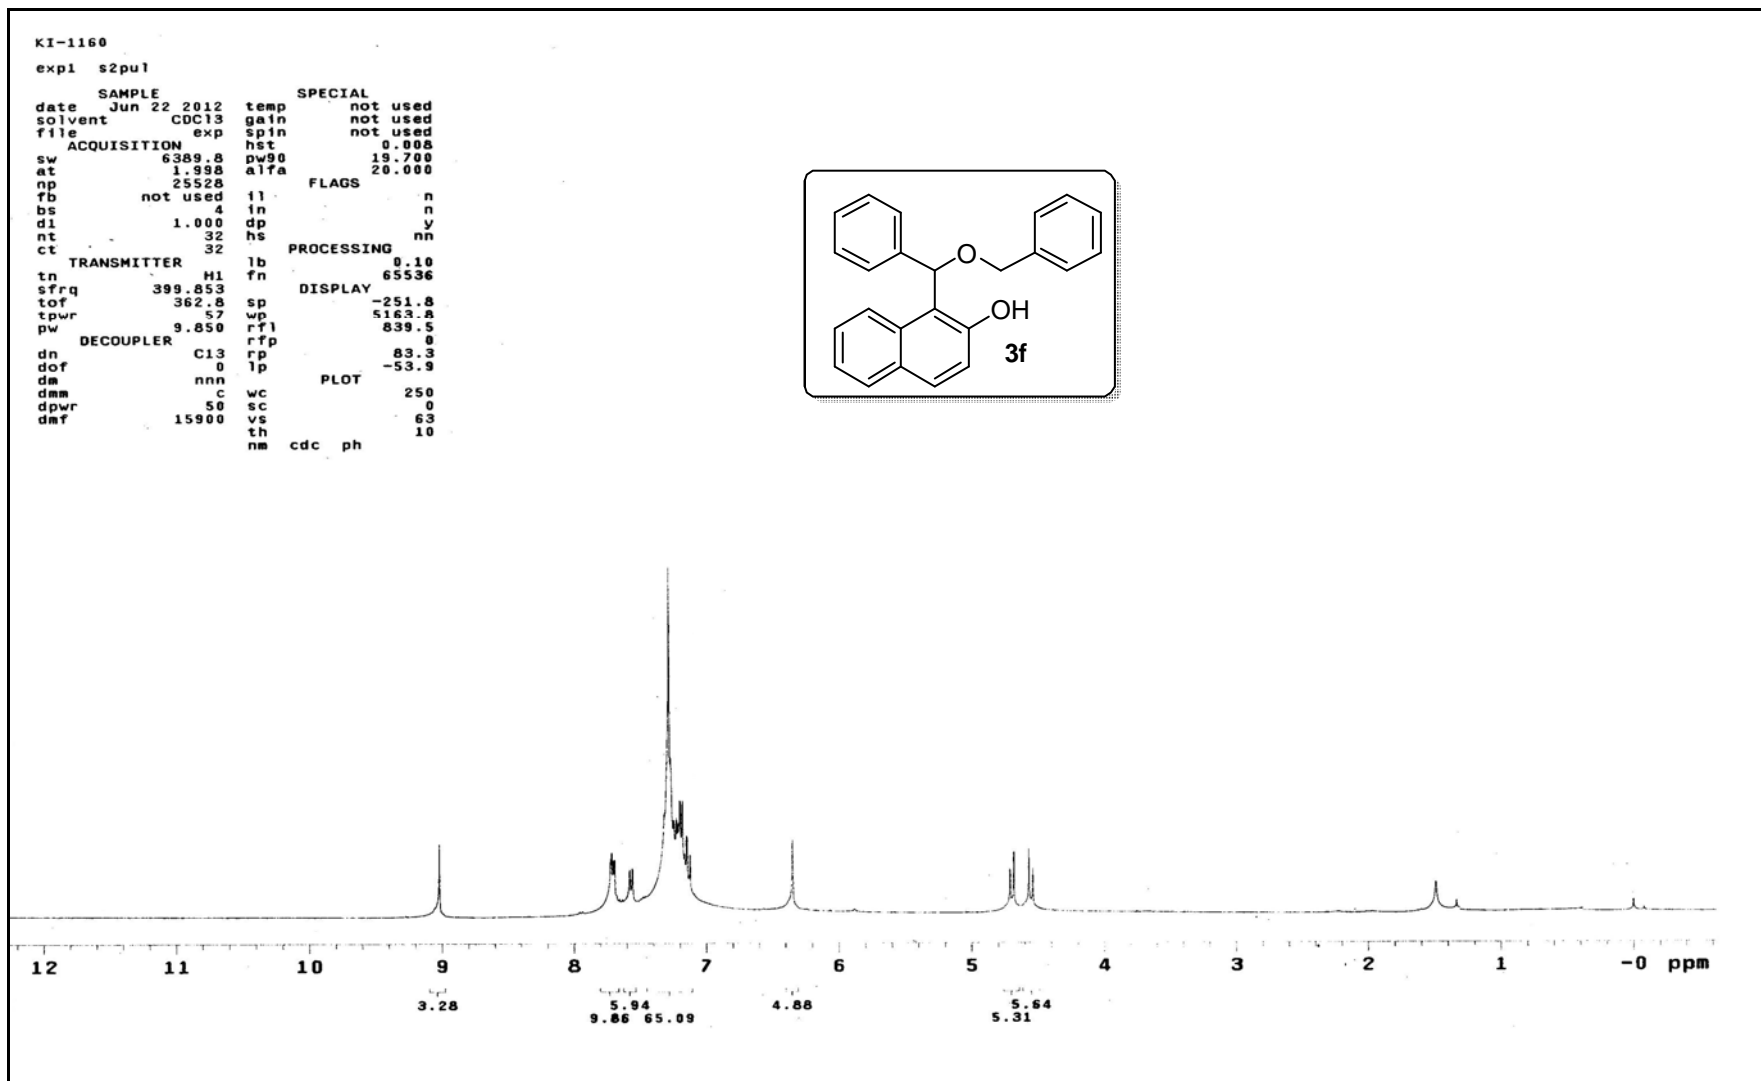

# <sup>13</sup>C NMR Spectra of 3f

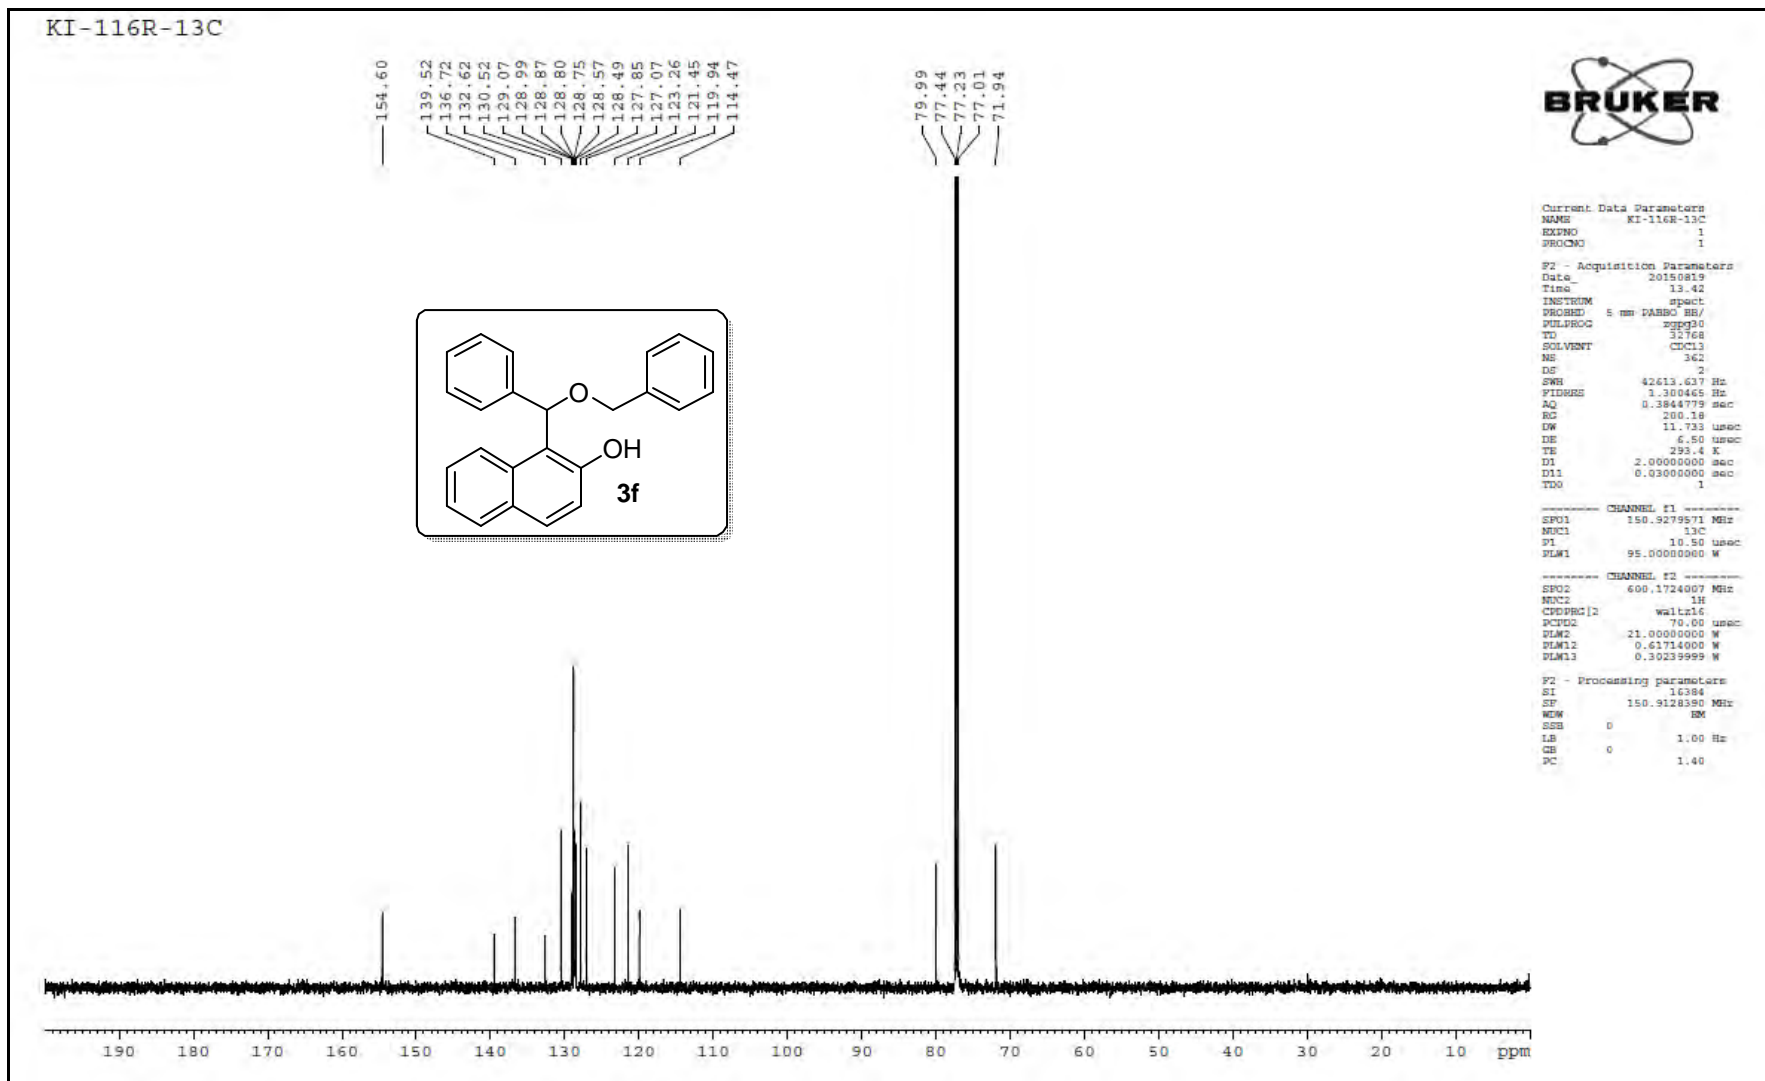

# <sup>1</sup>H NMR spectra of 3g

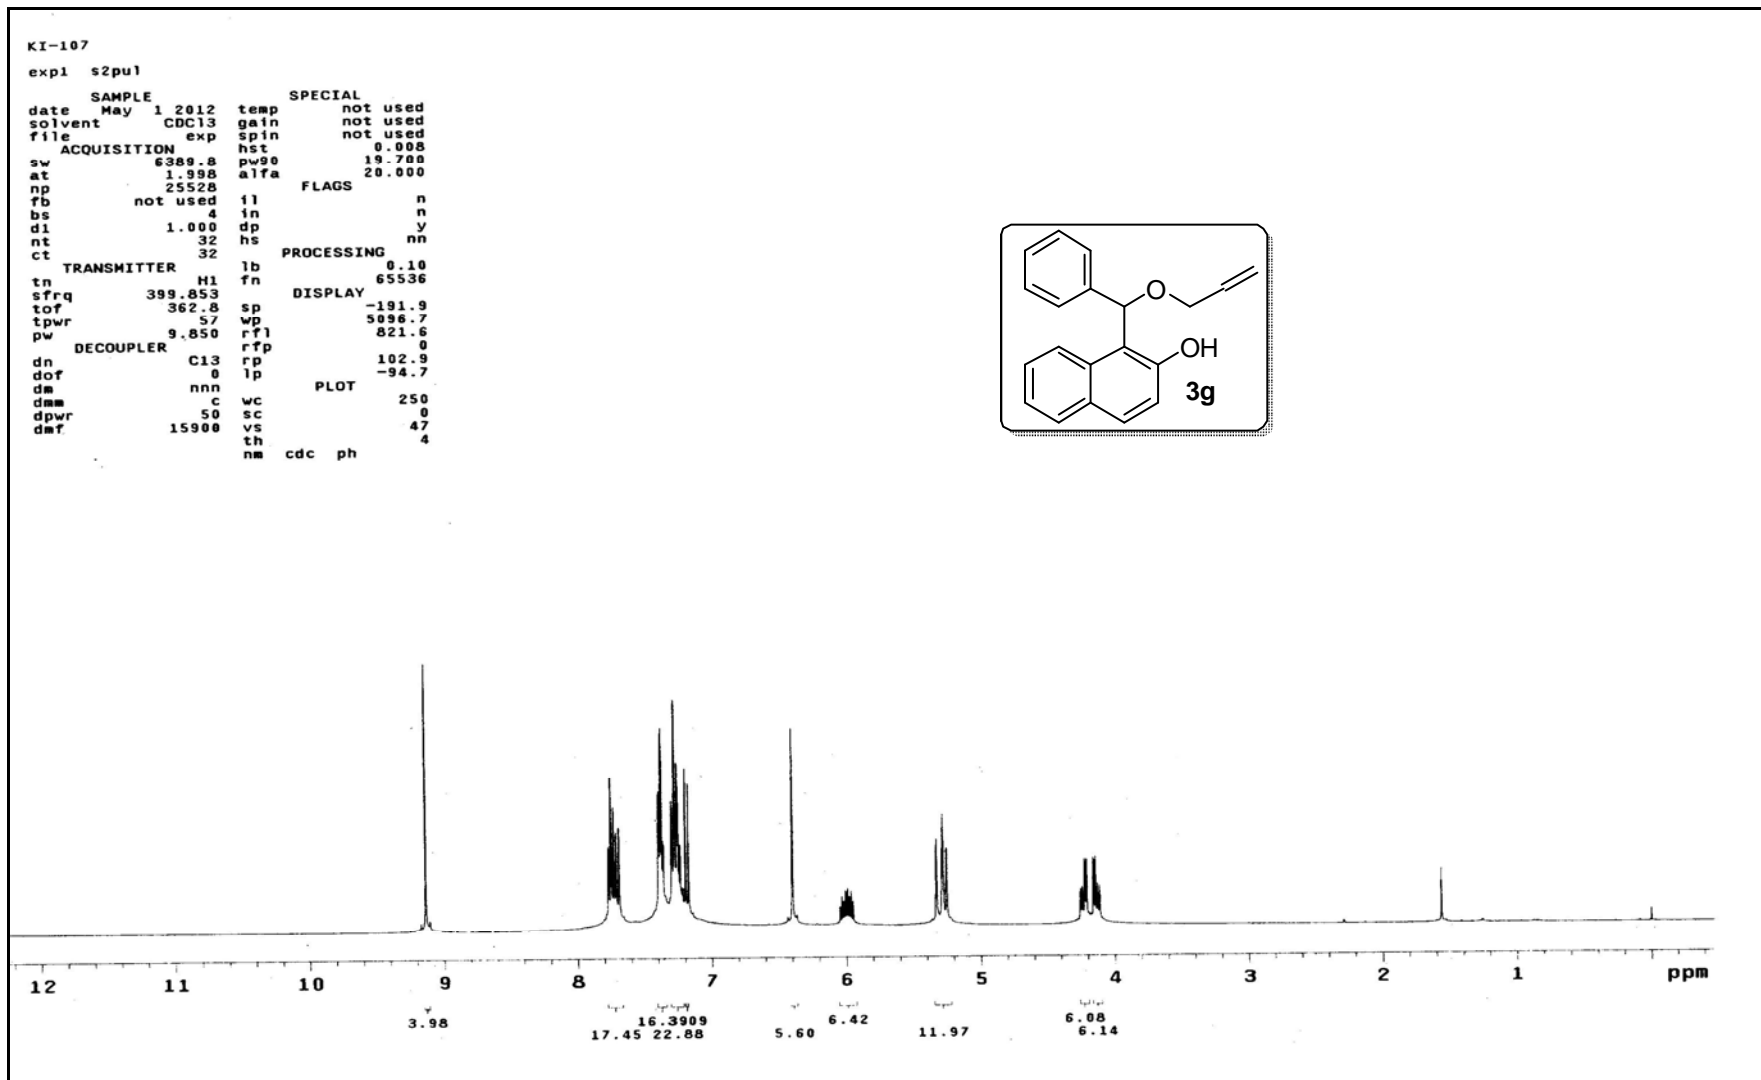

# <sup>13</sup>C NMR Spectra of 3g

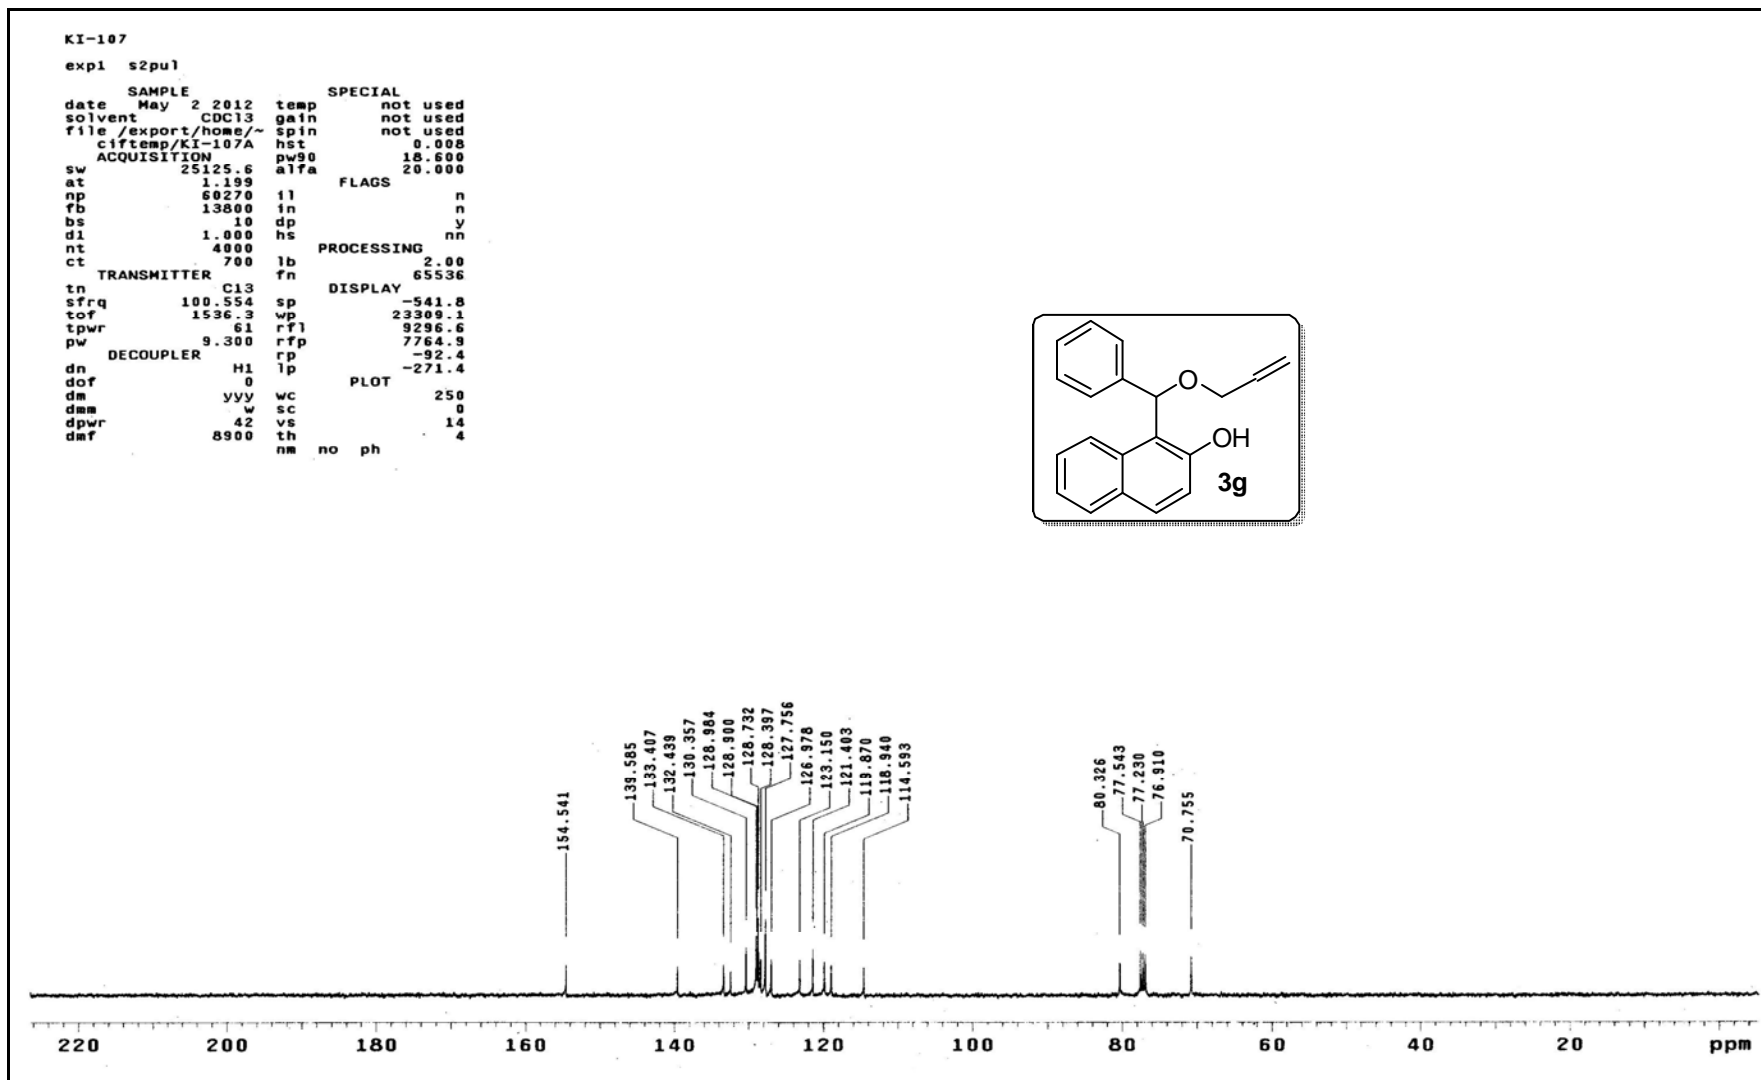

MS spectra of 3g

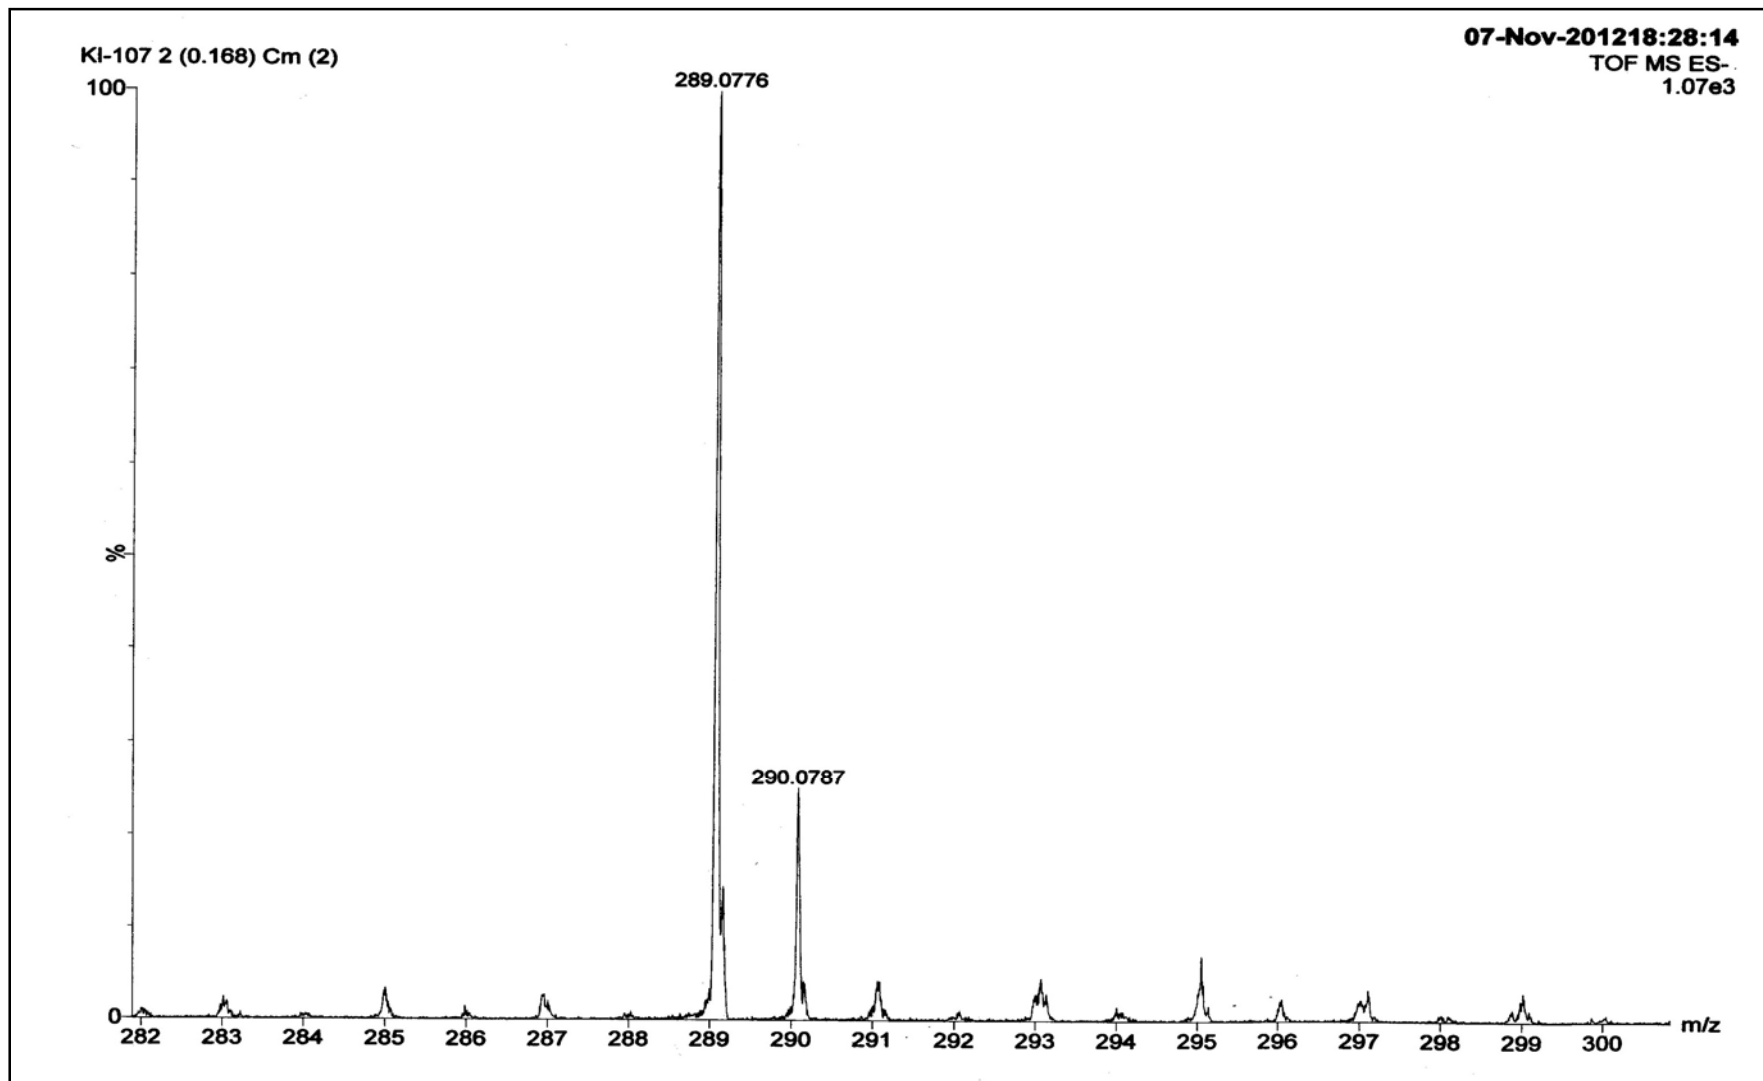

# <sup>1</sup>H NMR spectra of 3h

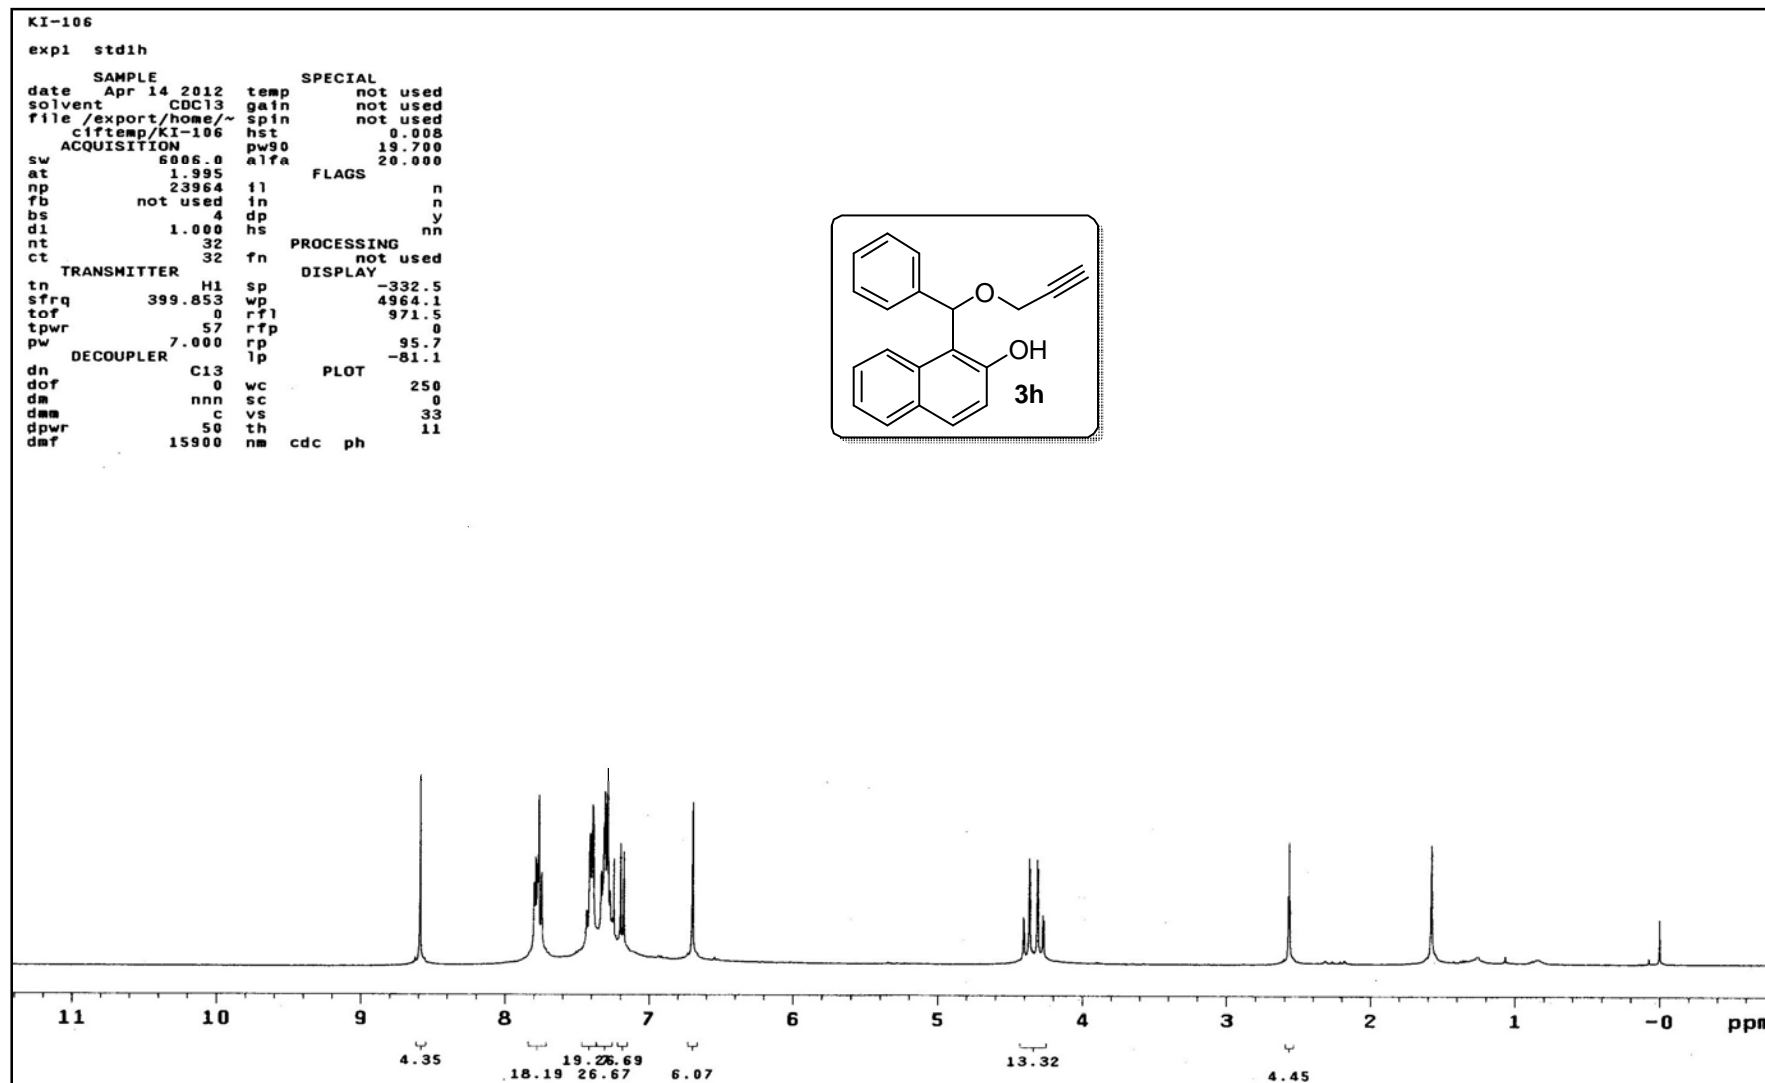

<sup>13</sup>C NMR Spectra of 3h

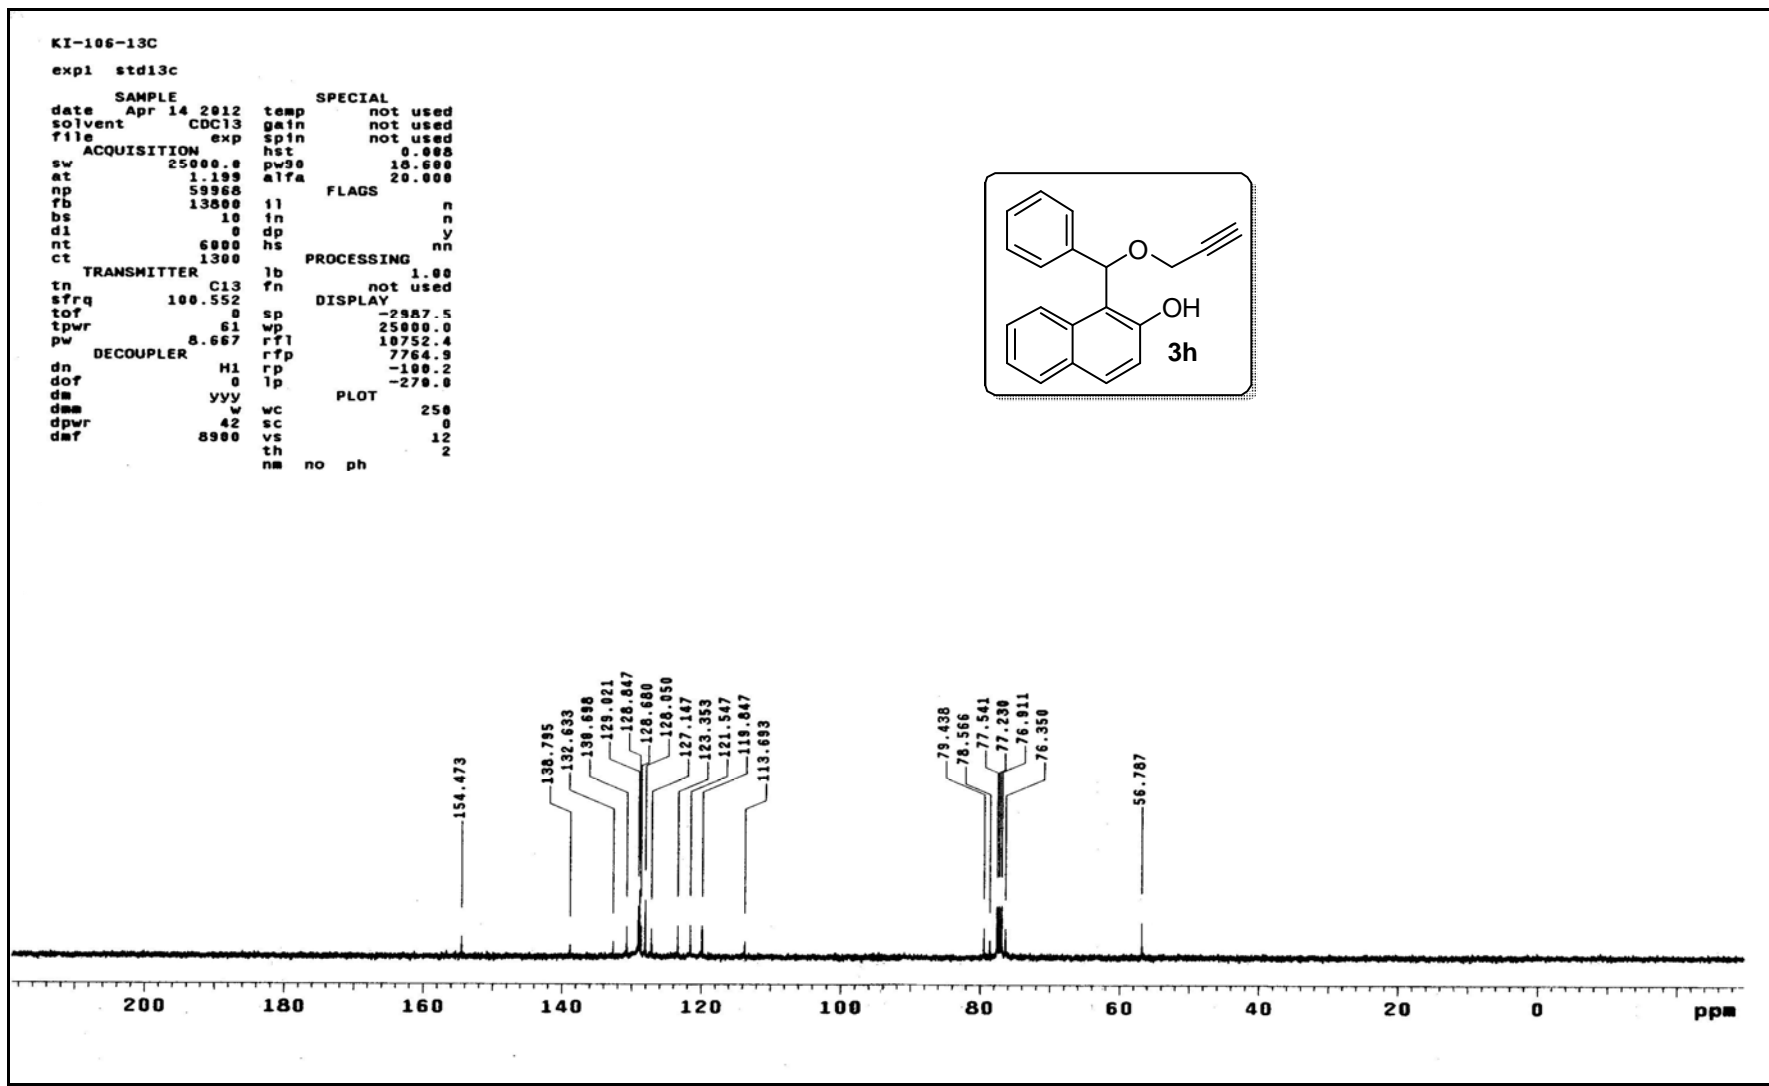



# <sup>1</sup>H NMR spectra of 3i

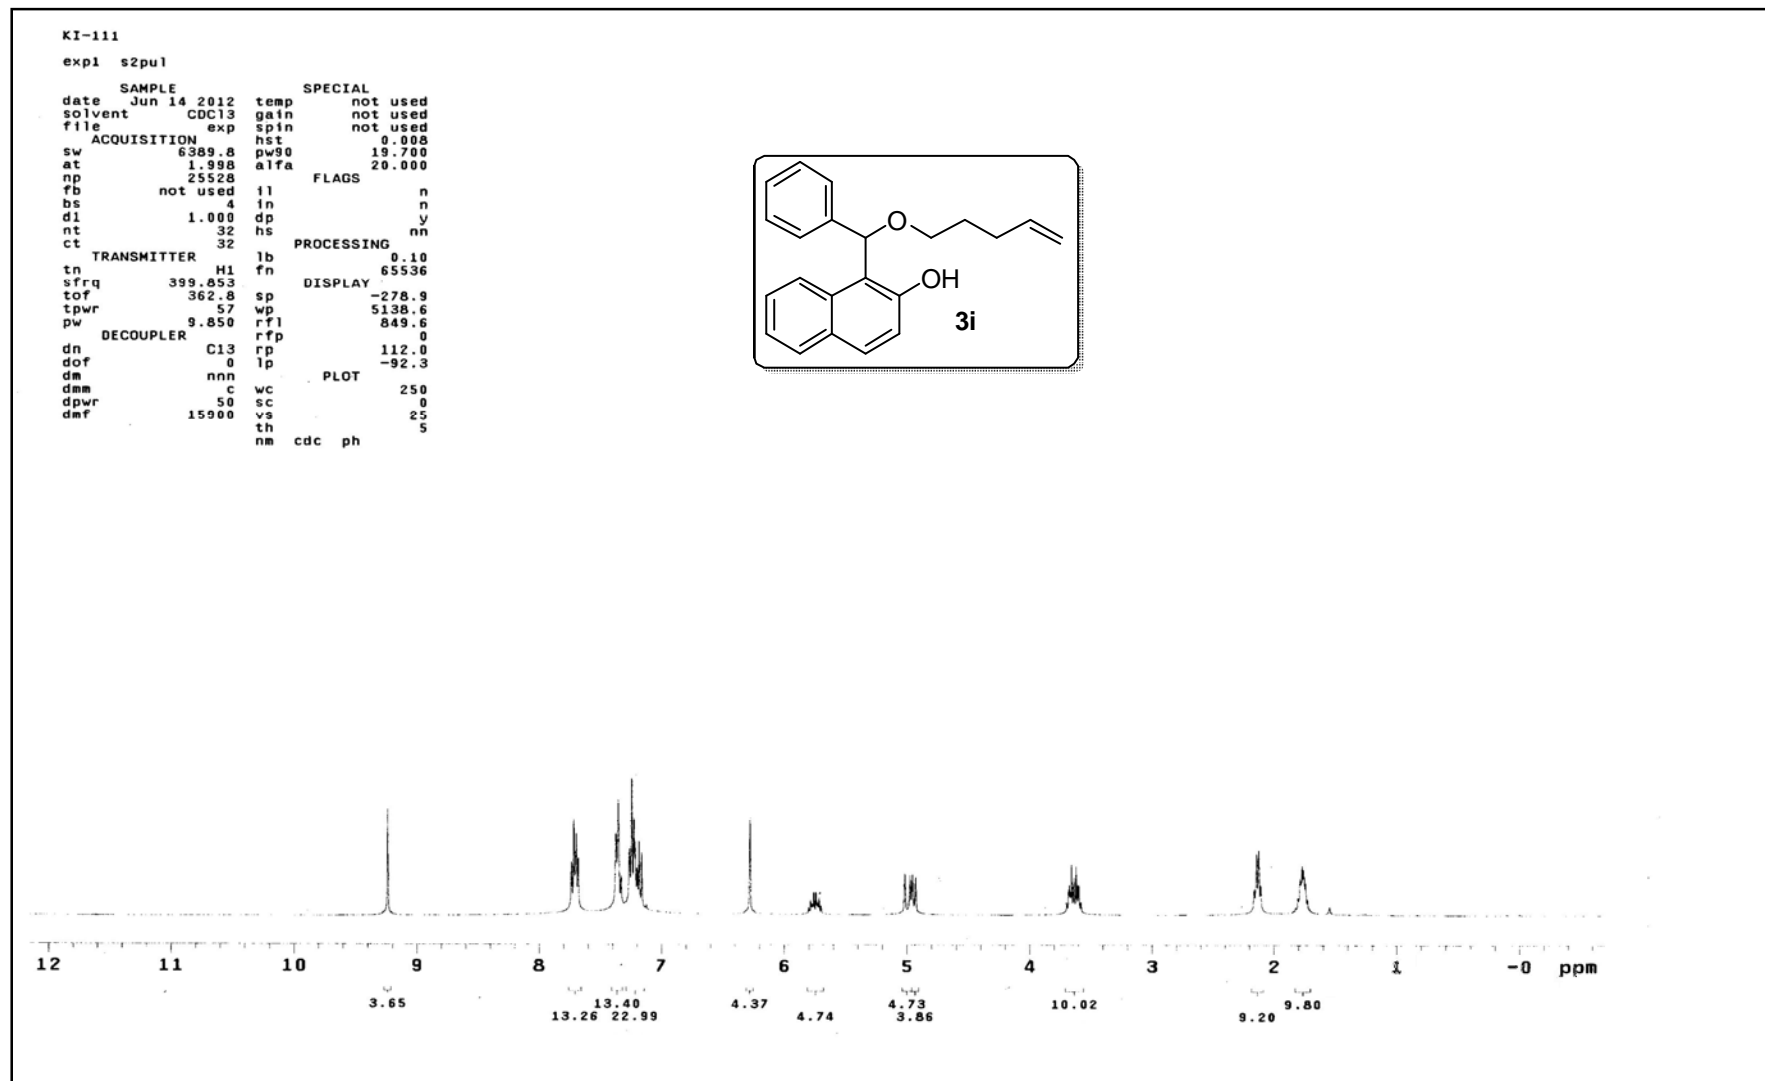

# <sup>13</sup>C NMR Spectra of 3i

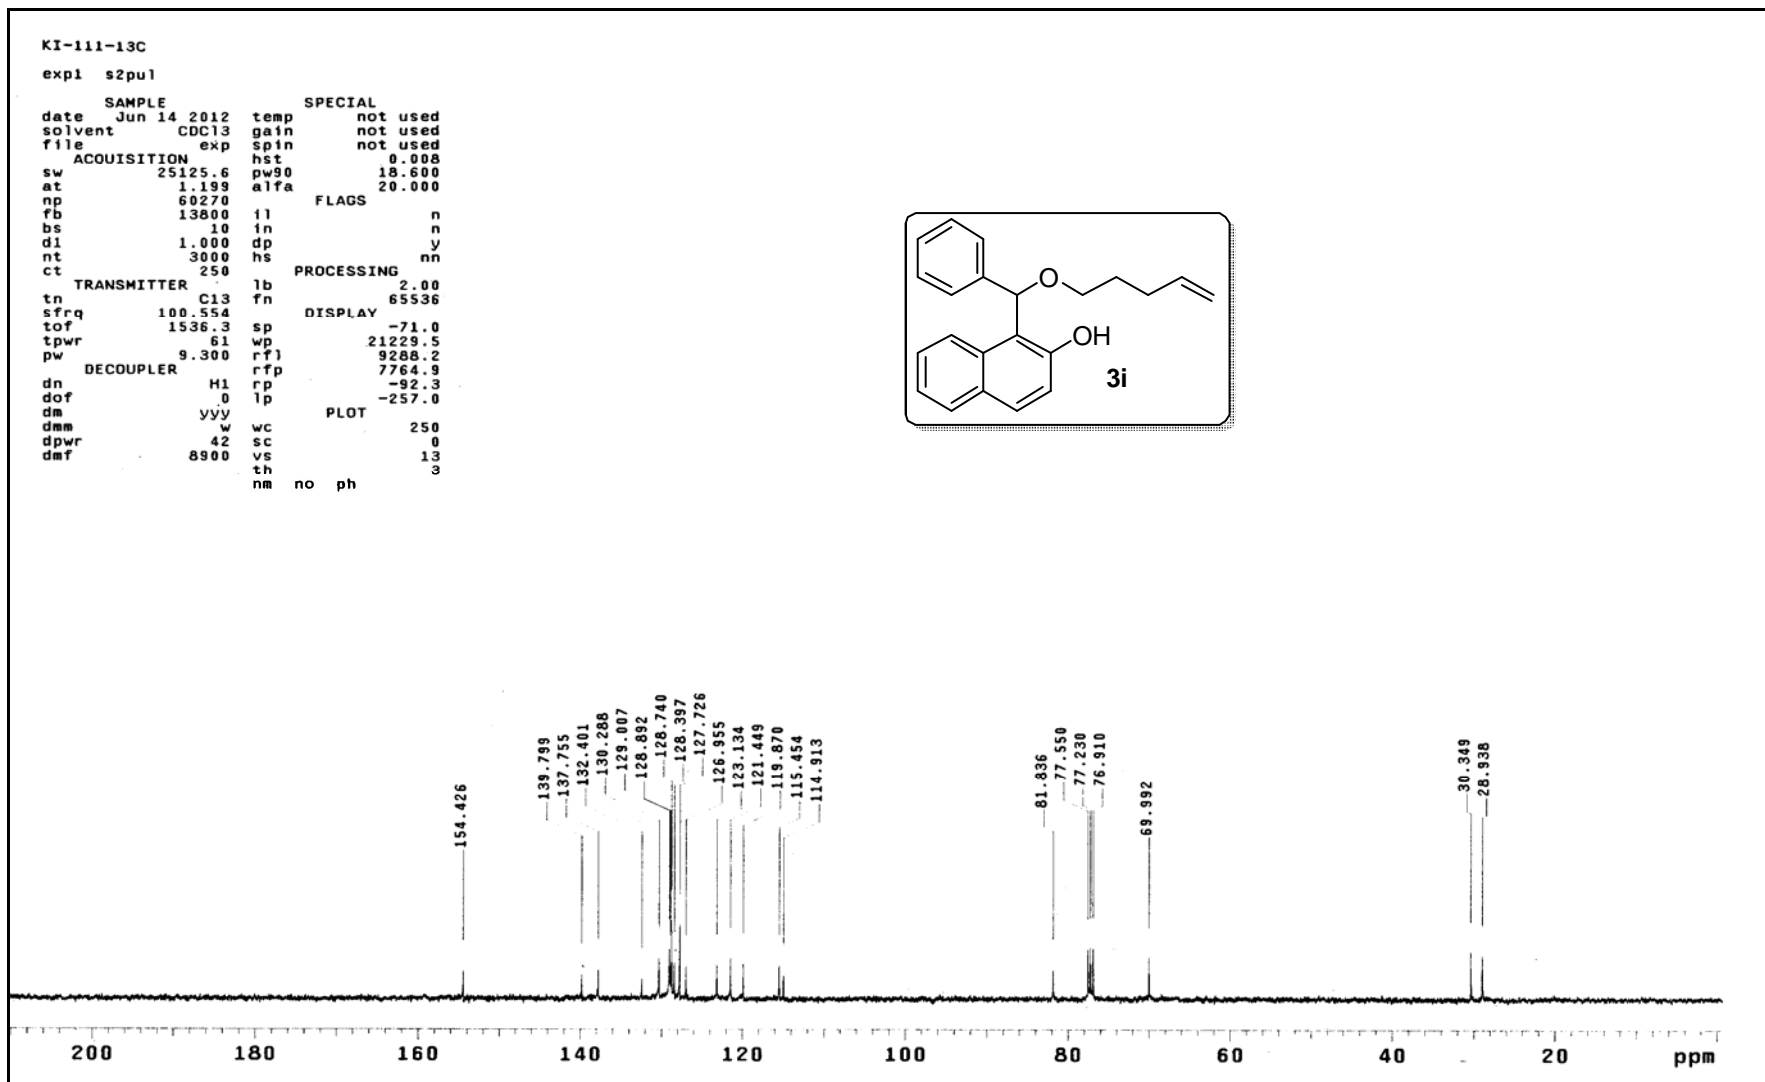

# MS Spectra of 3i

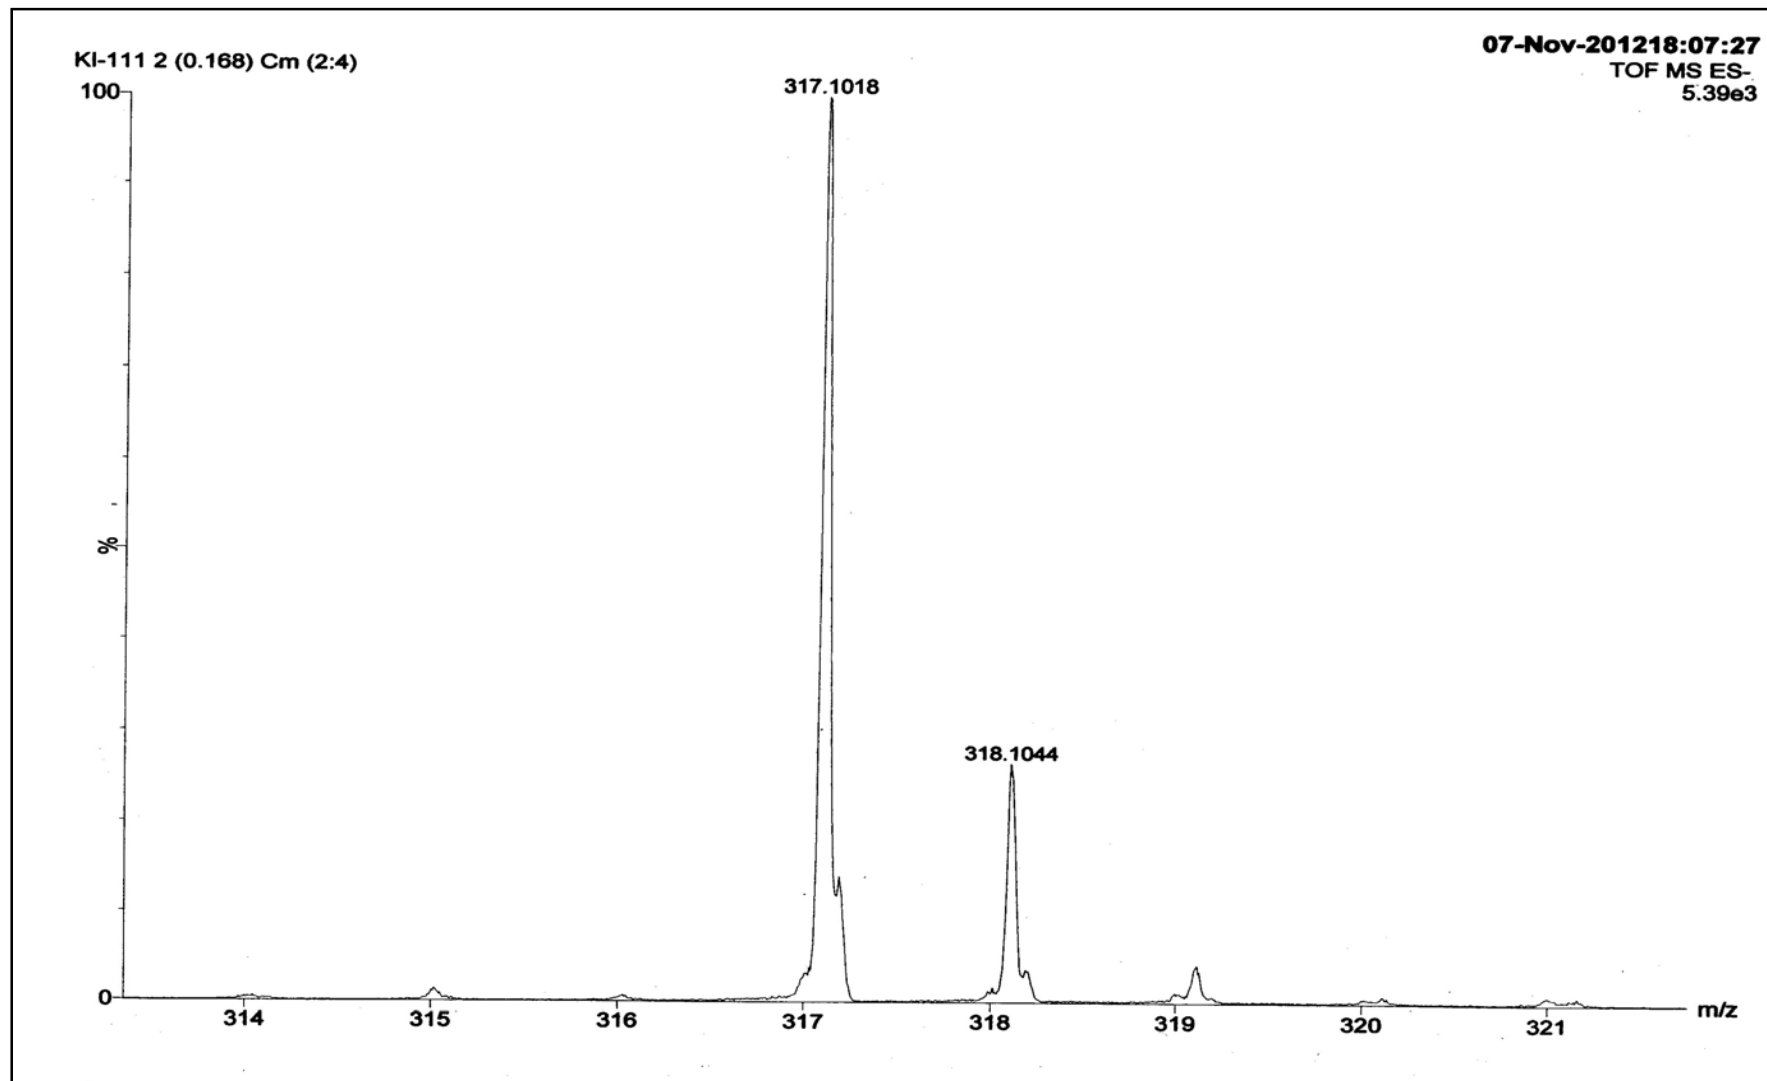

# <sup>1</sup>H NMR spectra of 3j

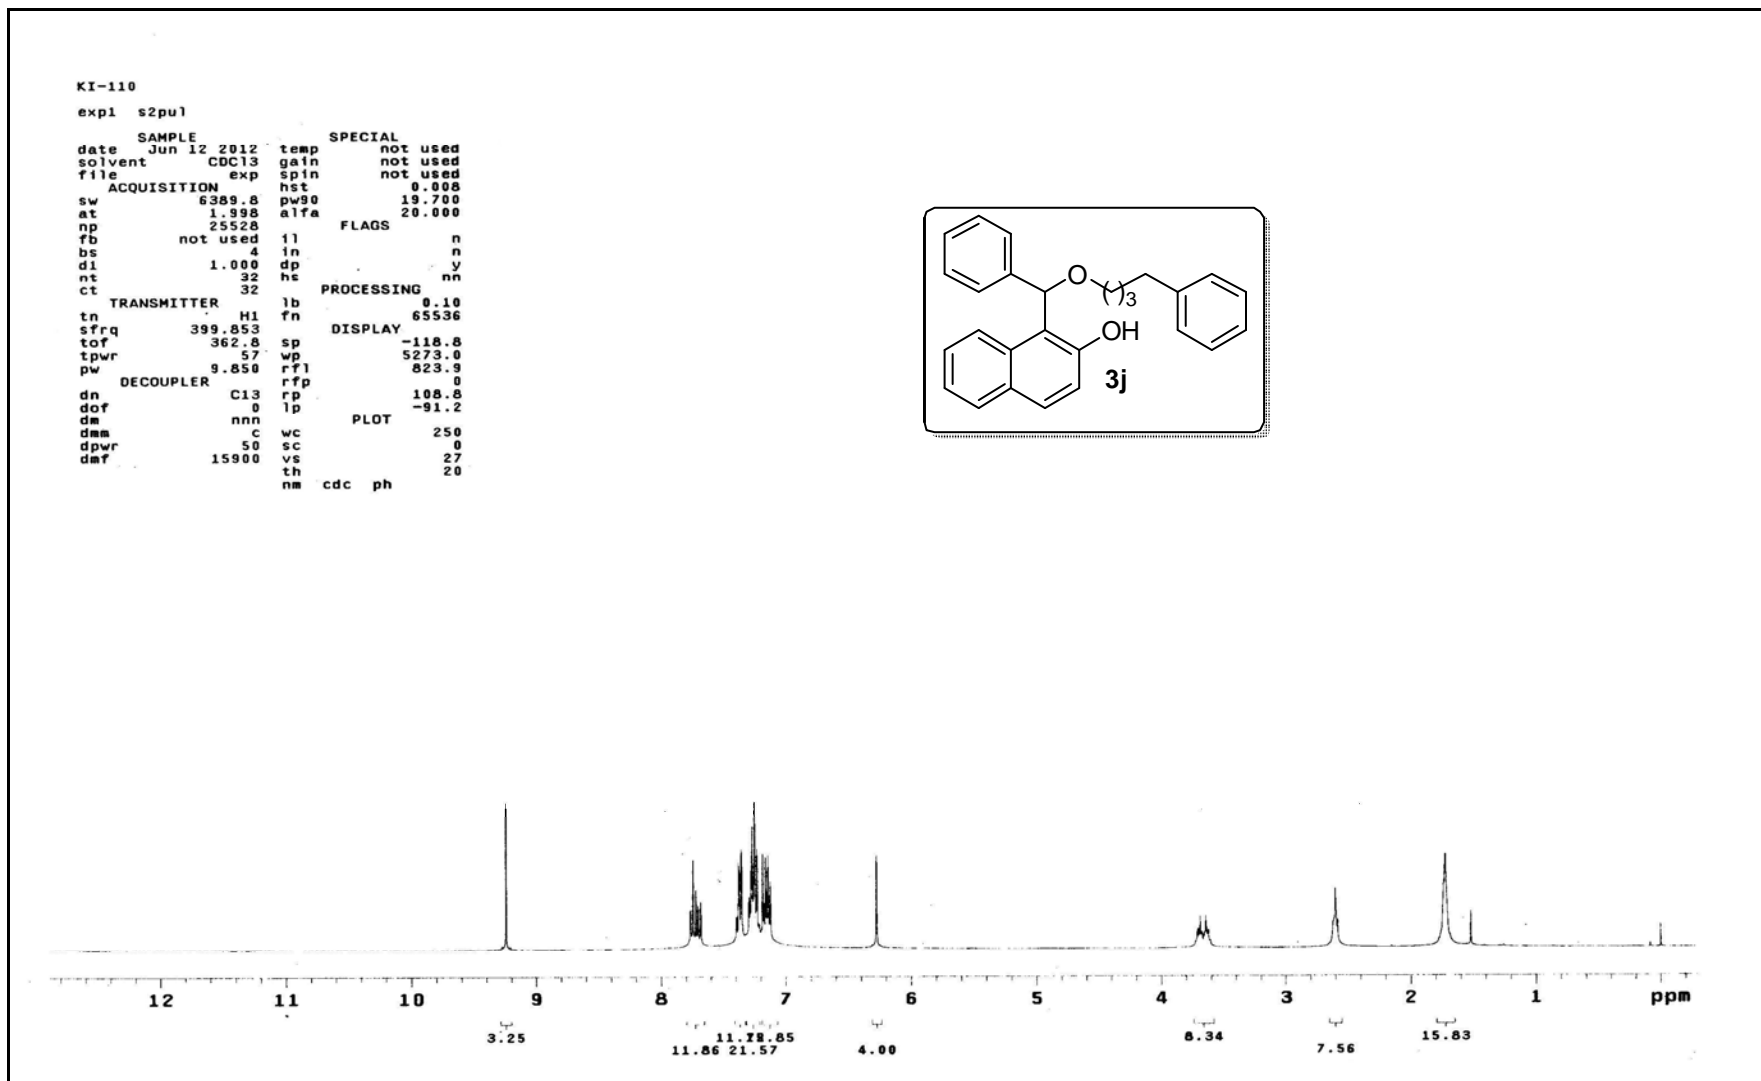

# <sup>13</sup>C NMR Spectra of 3j

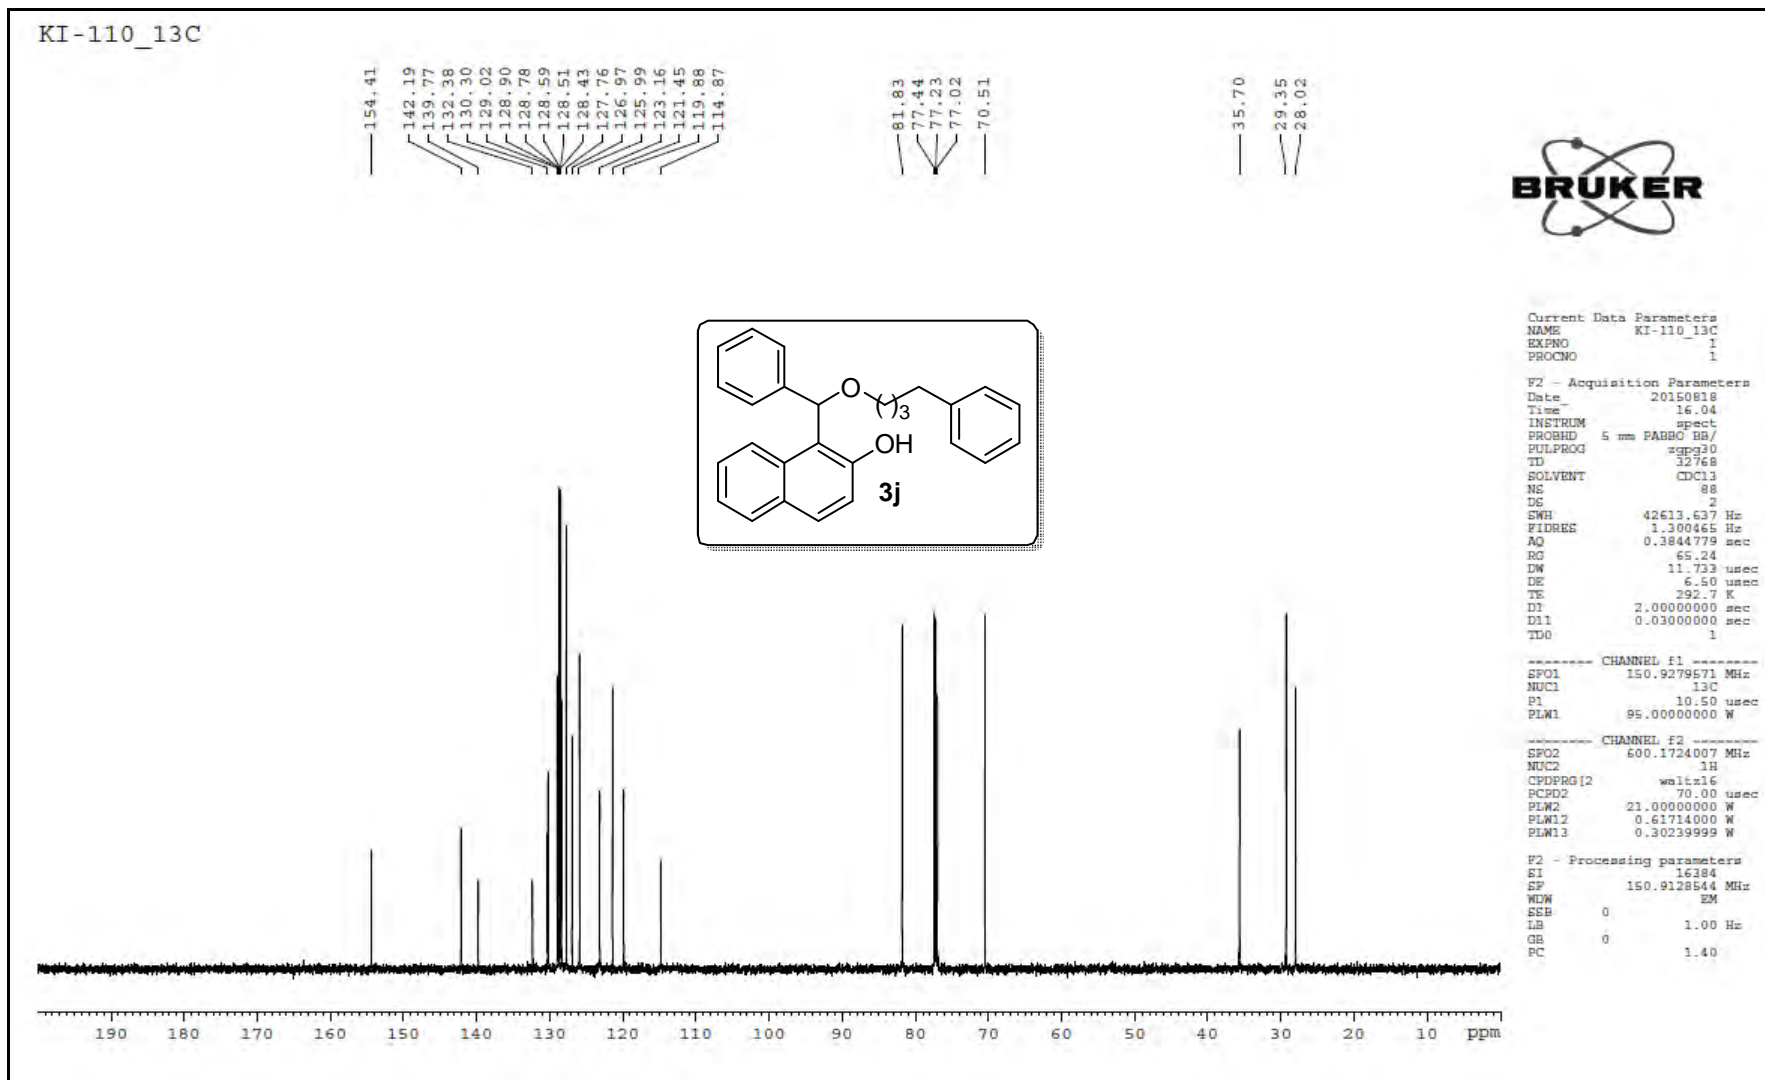

# MS Spectra of 3j

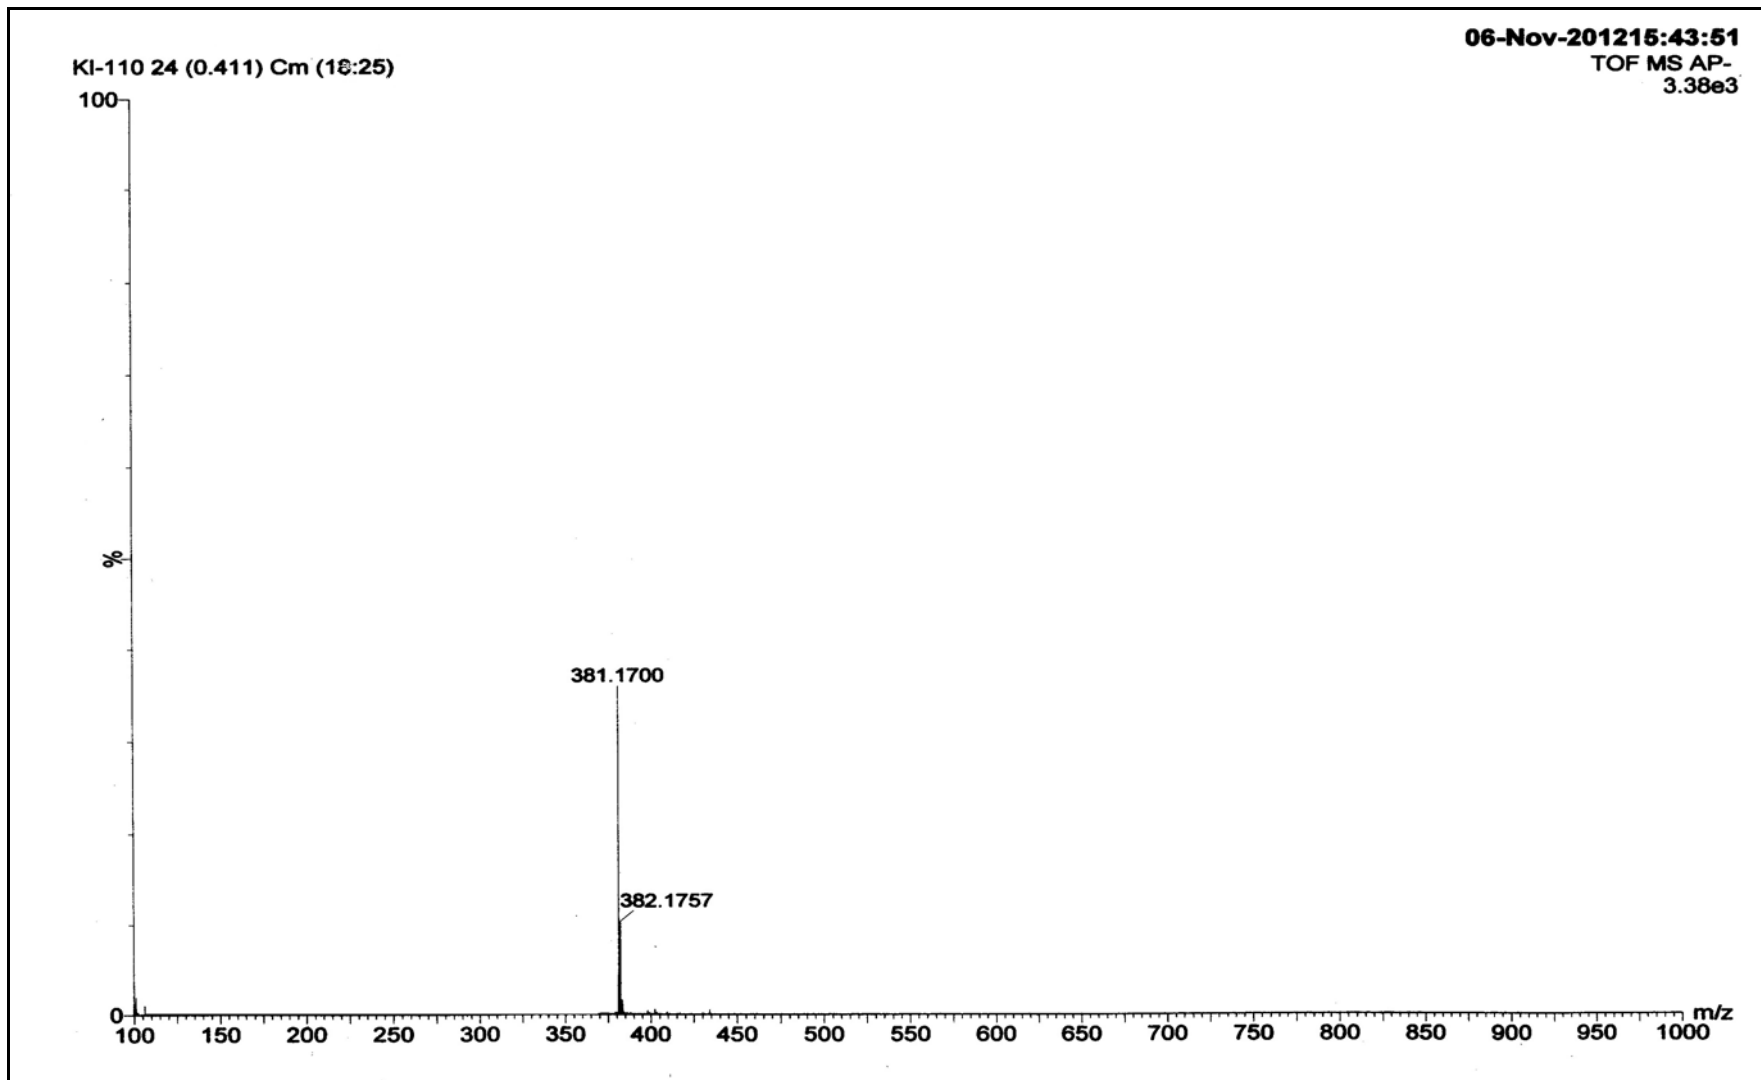

<sup>1</sup>H NMR spectra of 3k

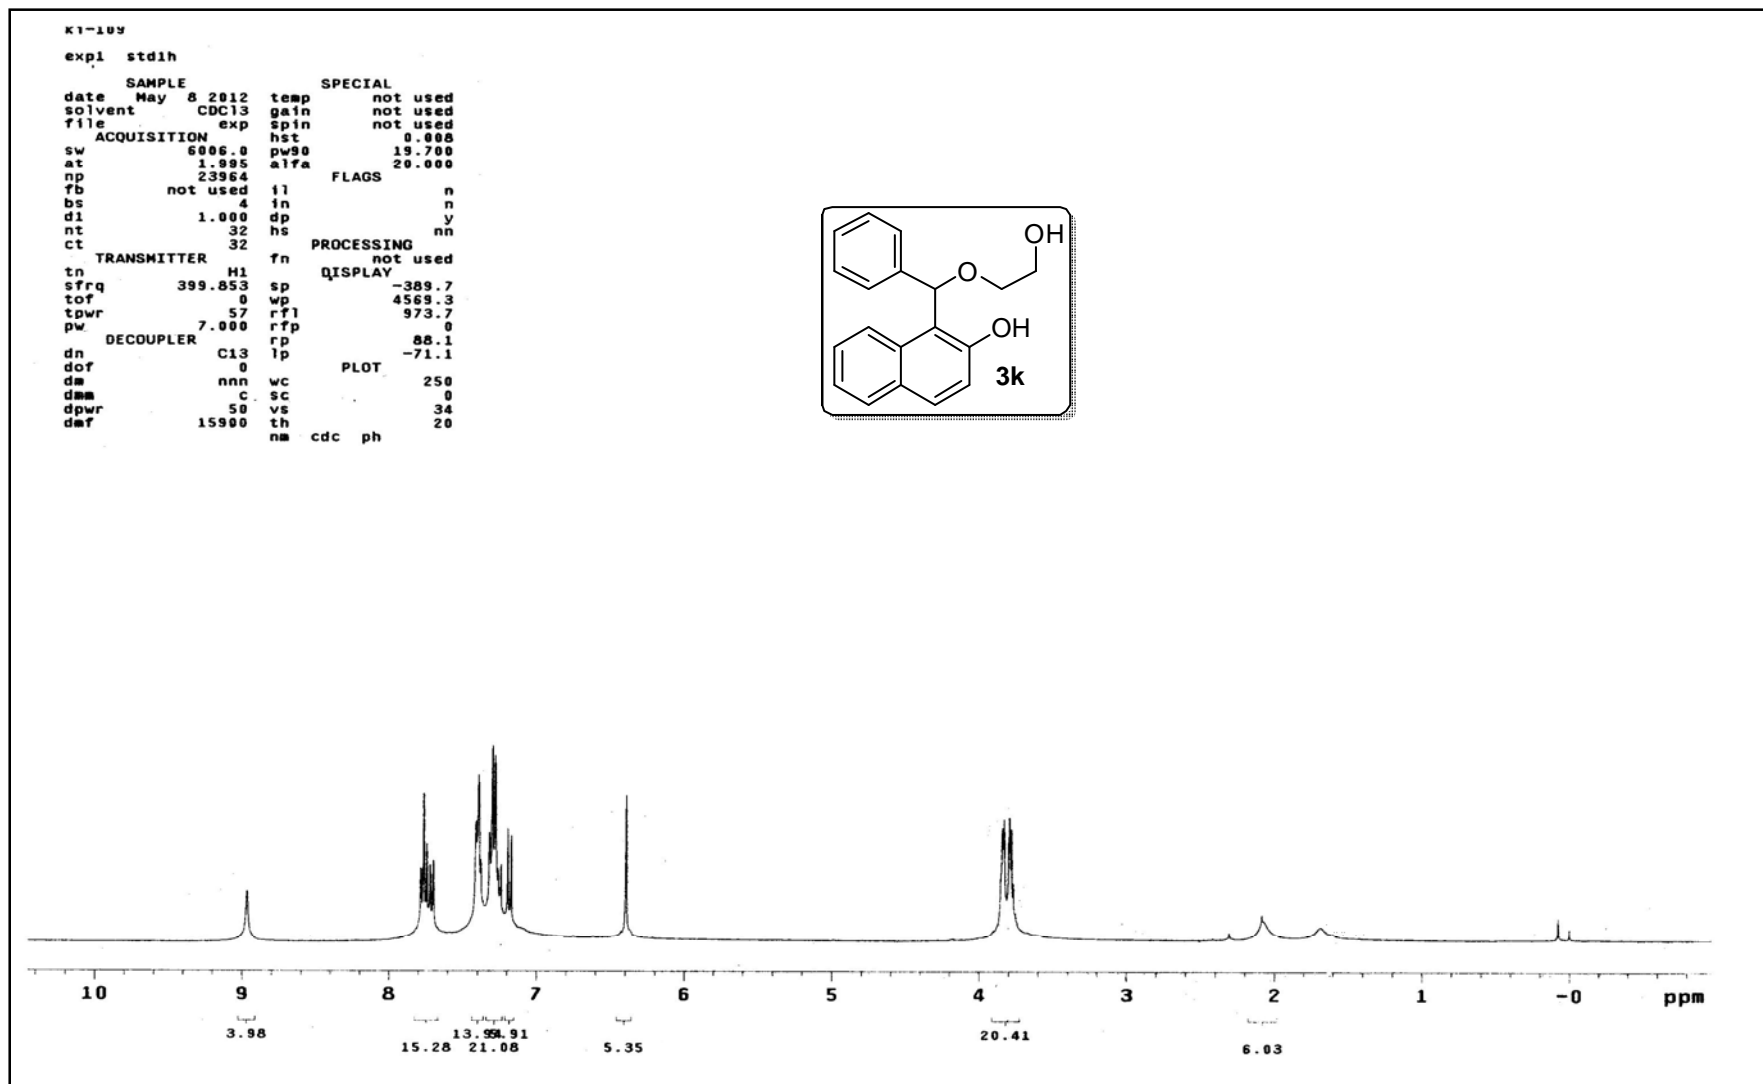

<sup>13</sup>C NMR Spectra of 3k

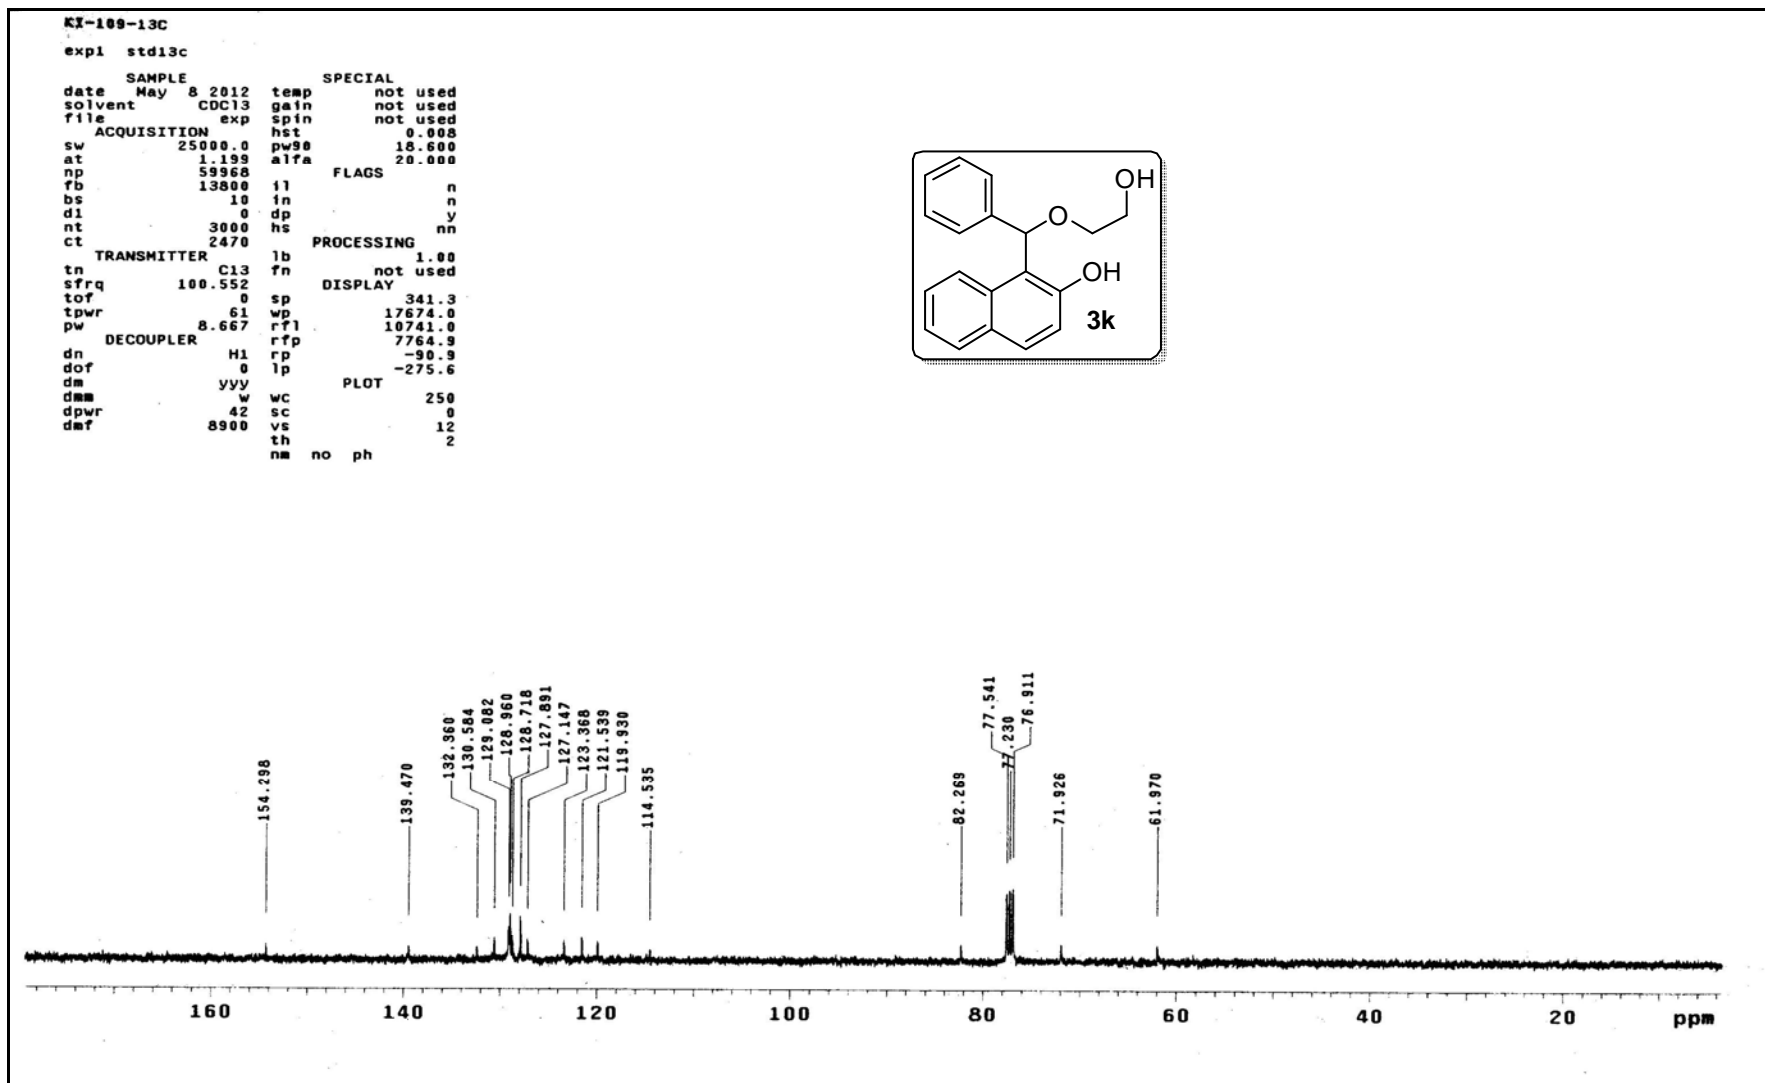



<sup>1</sup>H NMR spectra of 1-((2-acetoxyethoxy)(phenyl)methyl)naphthalen-2-yl acetate (3k')

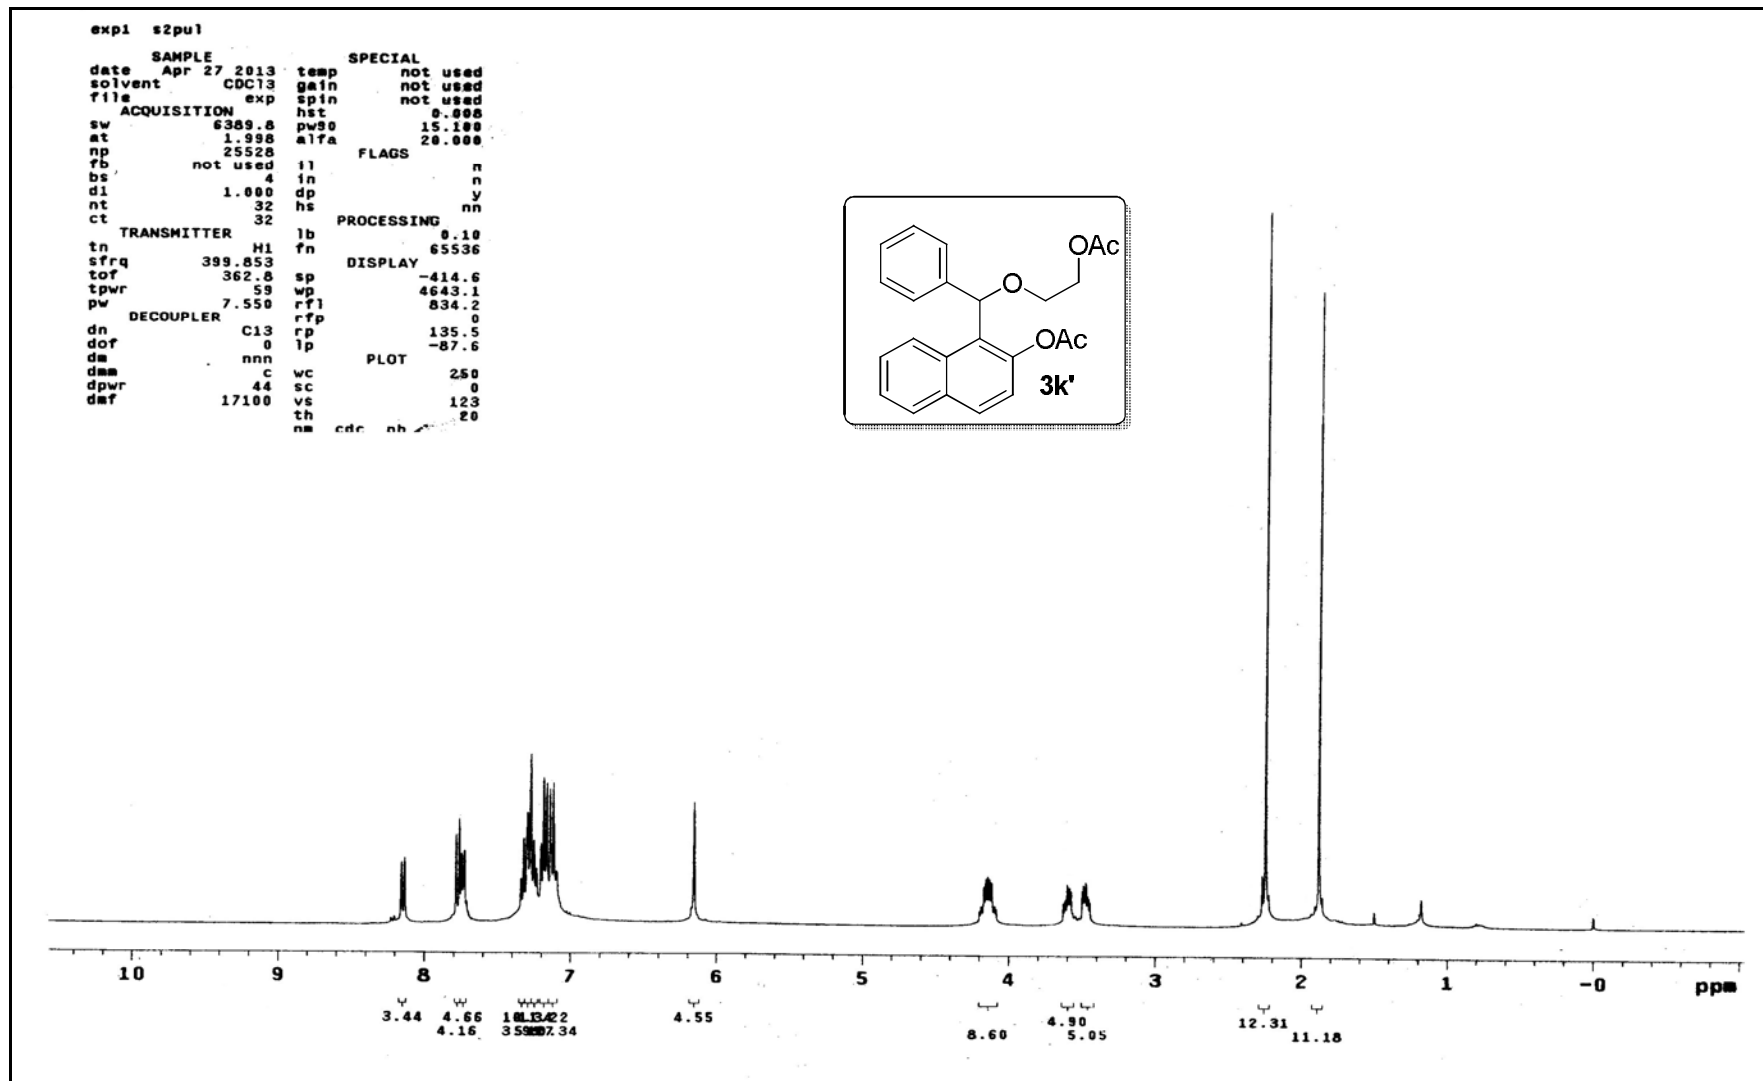

<sup>13</sup>C NMR spectra of 1-((2-acetoxyethoxy)(phenyl)methyl)naphthalen-2-yl acetate (3k')

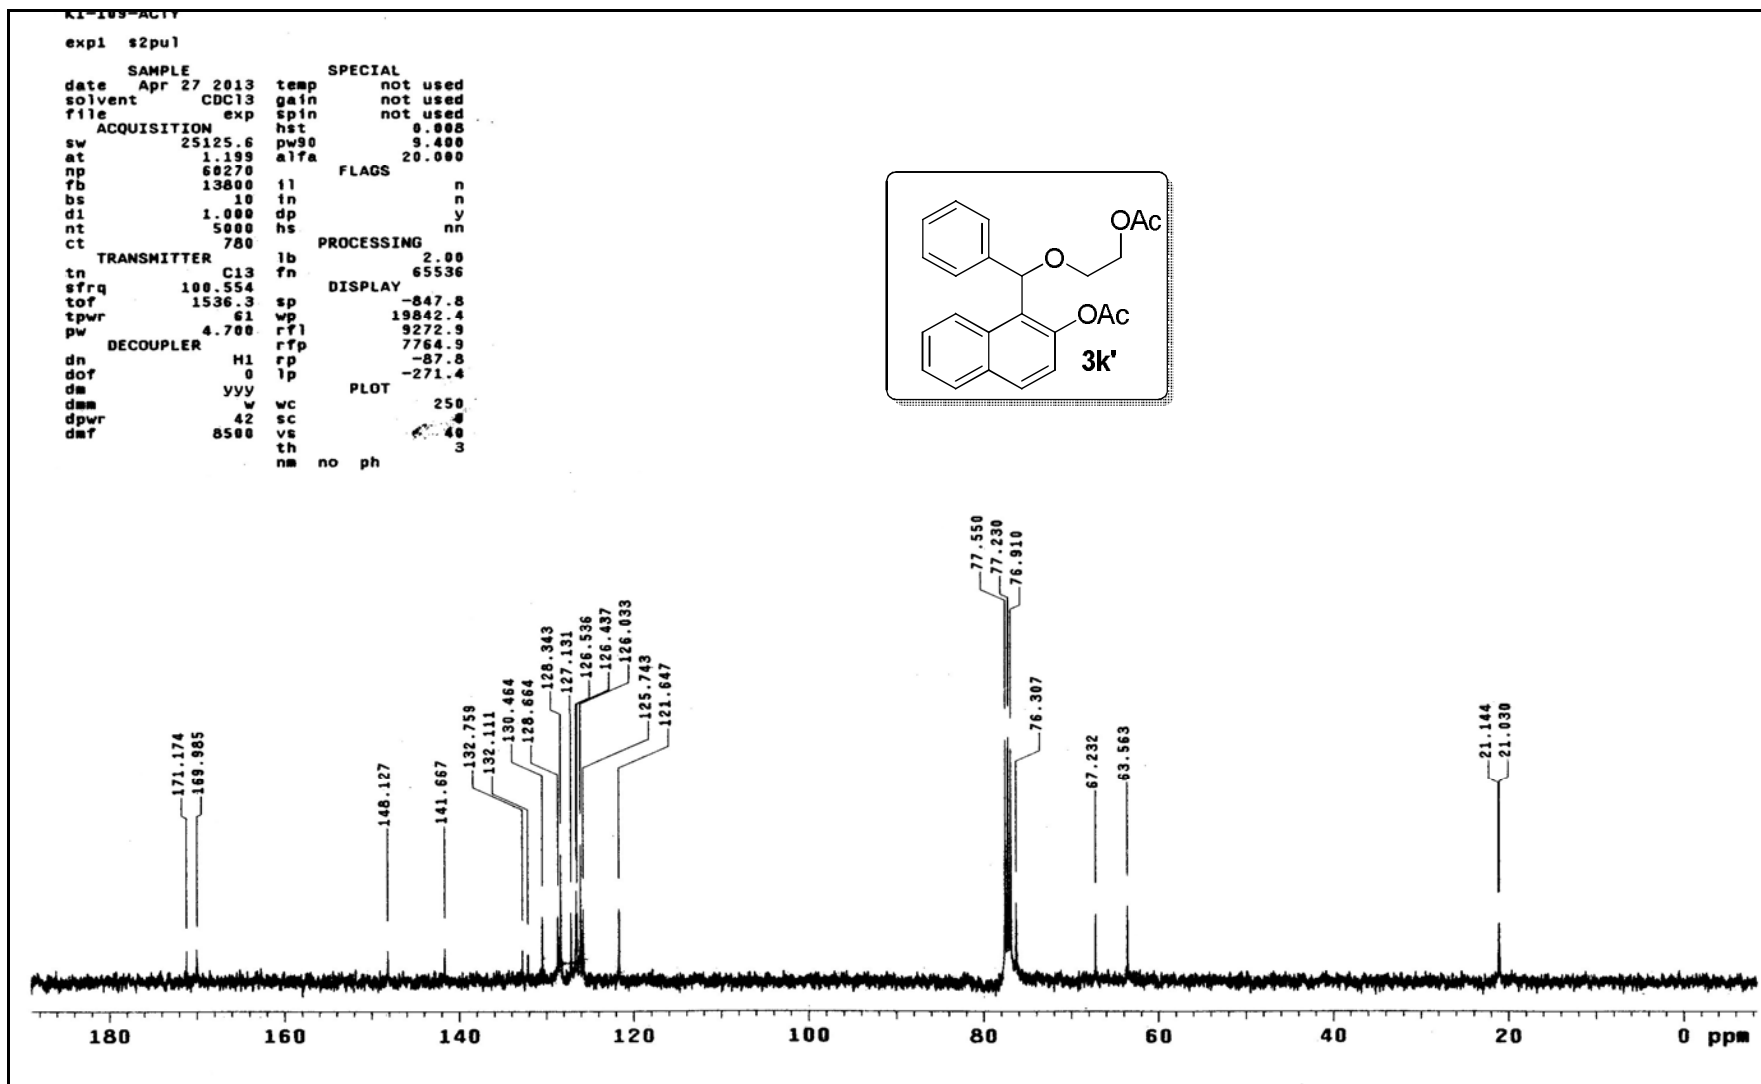

# <sup>1</sup>H NMR spectra of 3I

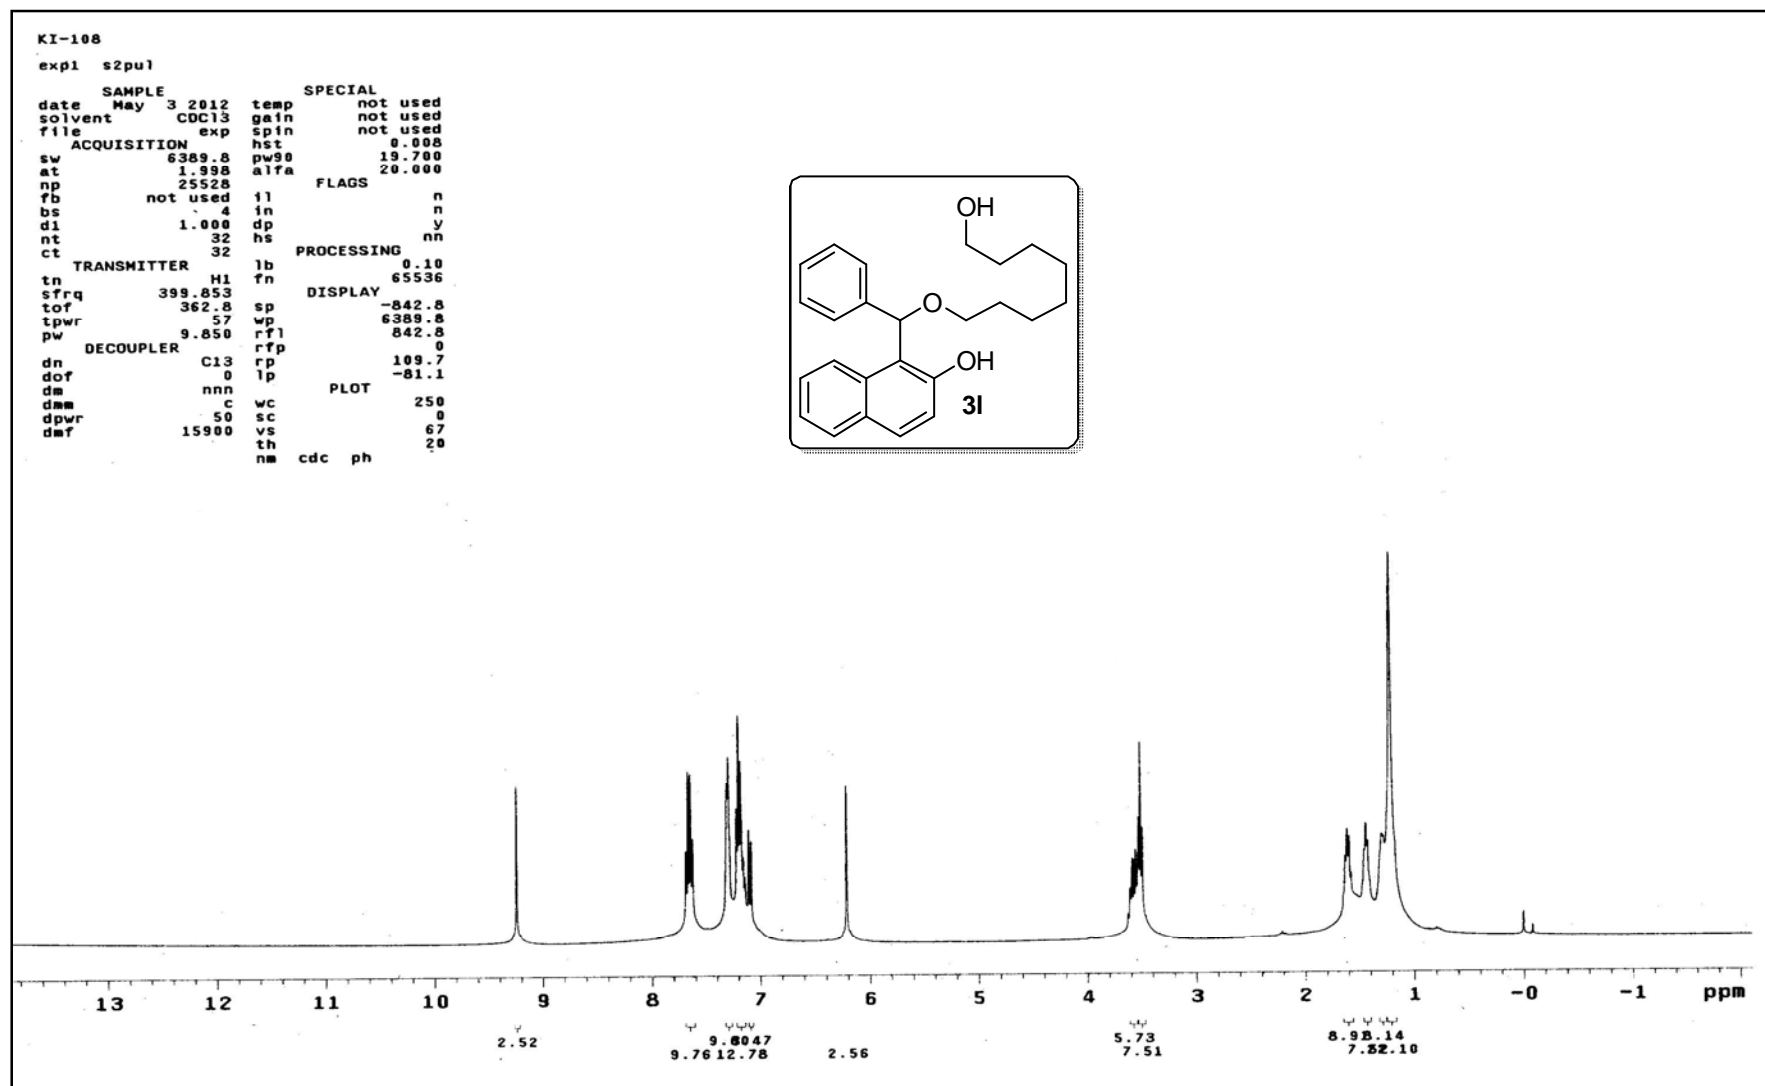

<sup>13</sup>C NMR Spectra of 3I

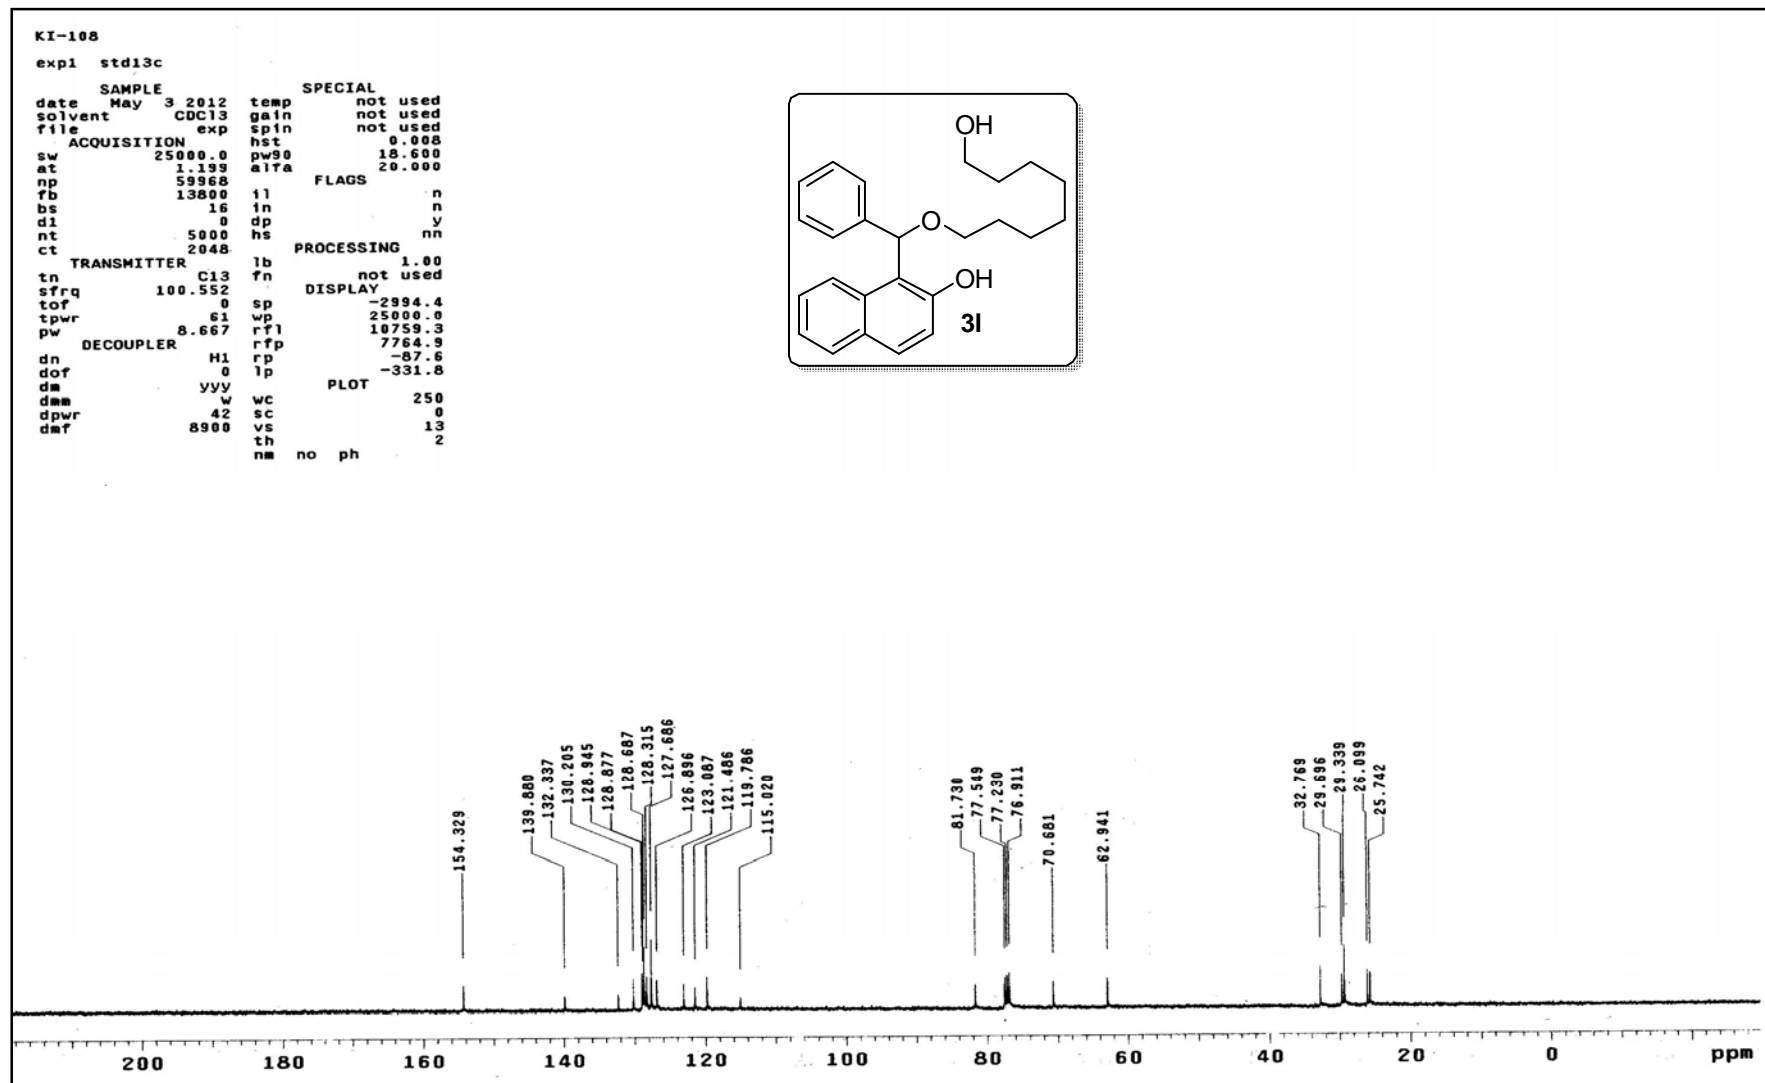

# <sup>1</sup>H NMR spectra of 3m

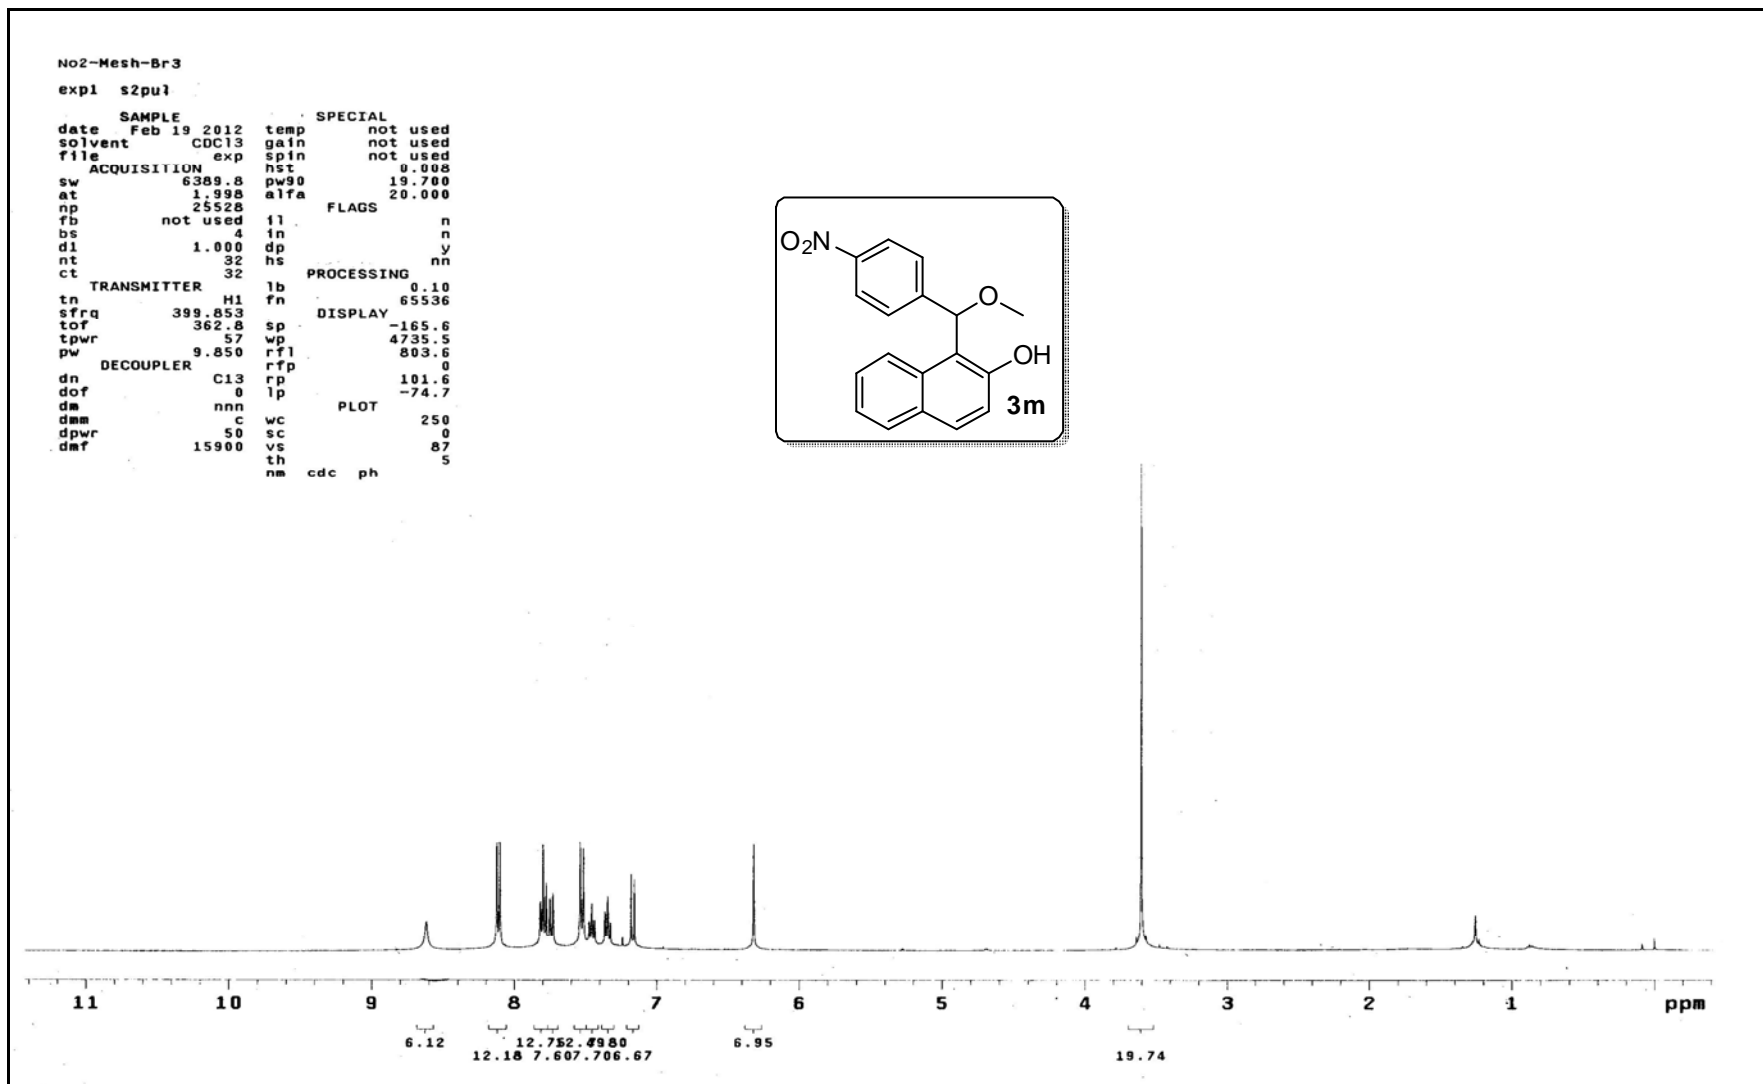

# <sup>13</sup>C NMR spectra of 3m

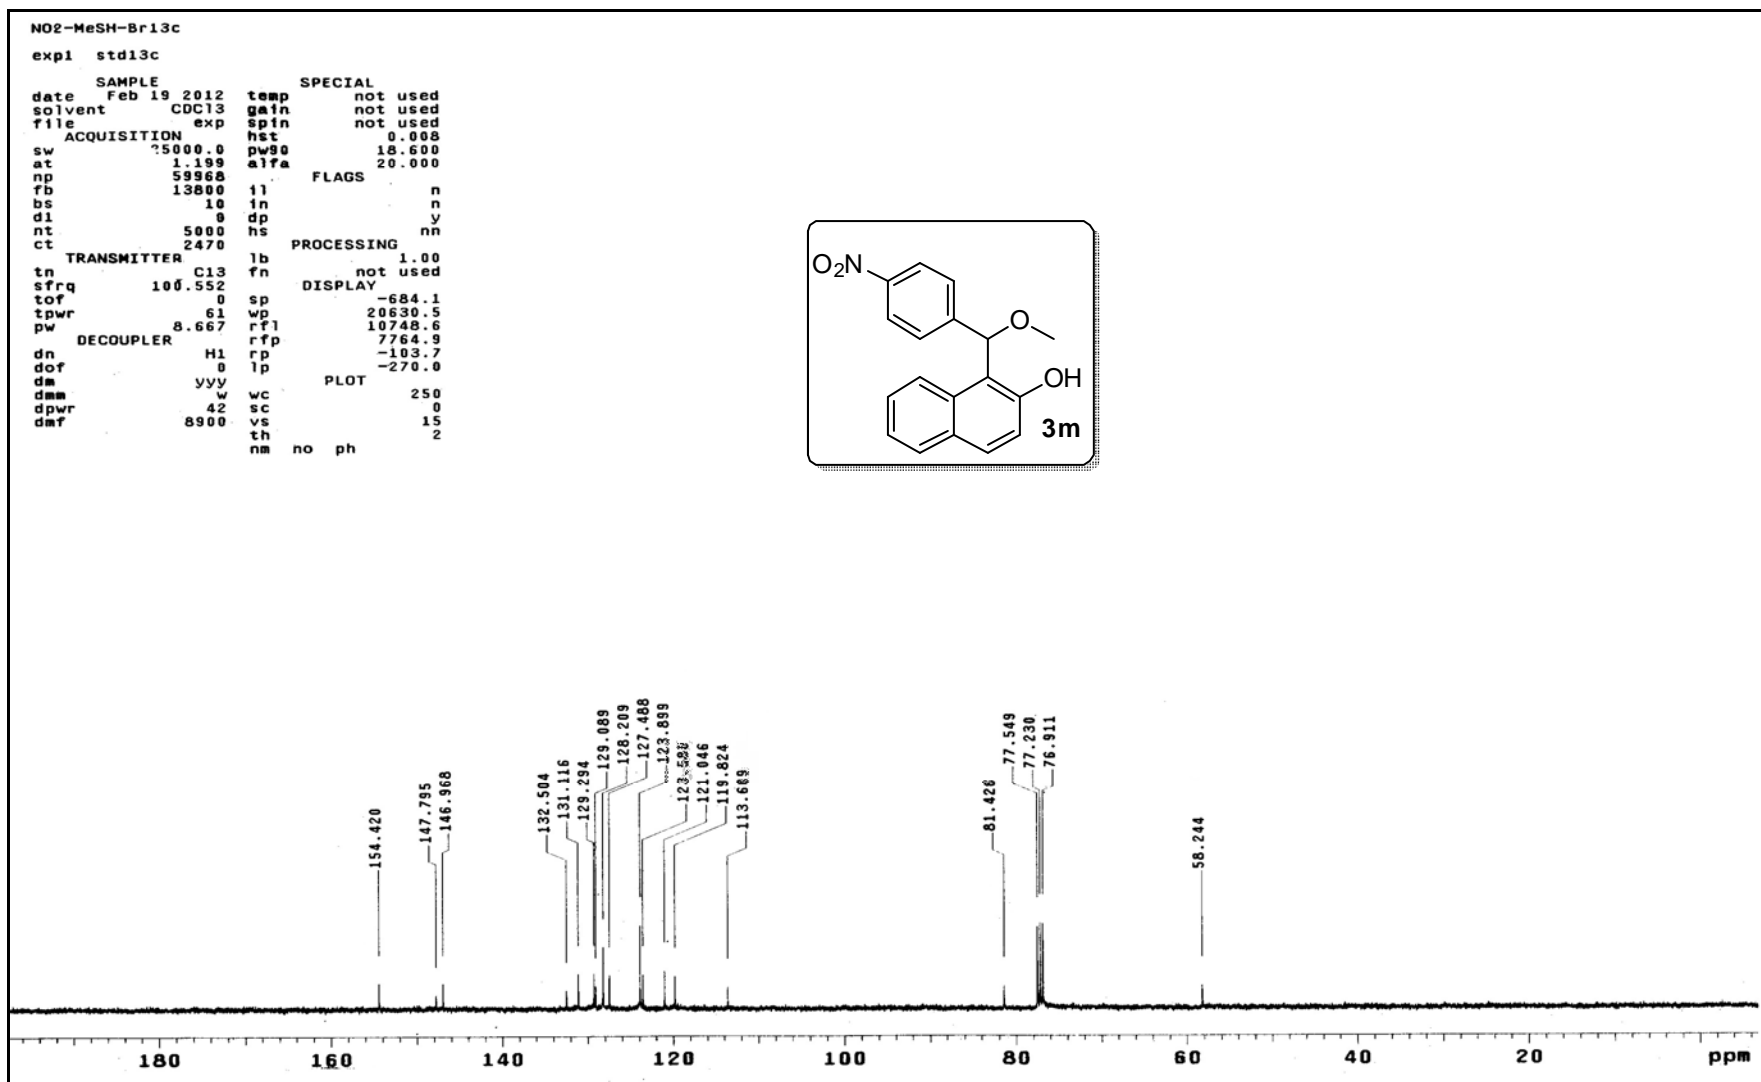

<sup>1</sup>H NMR spectra of 3n

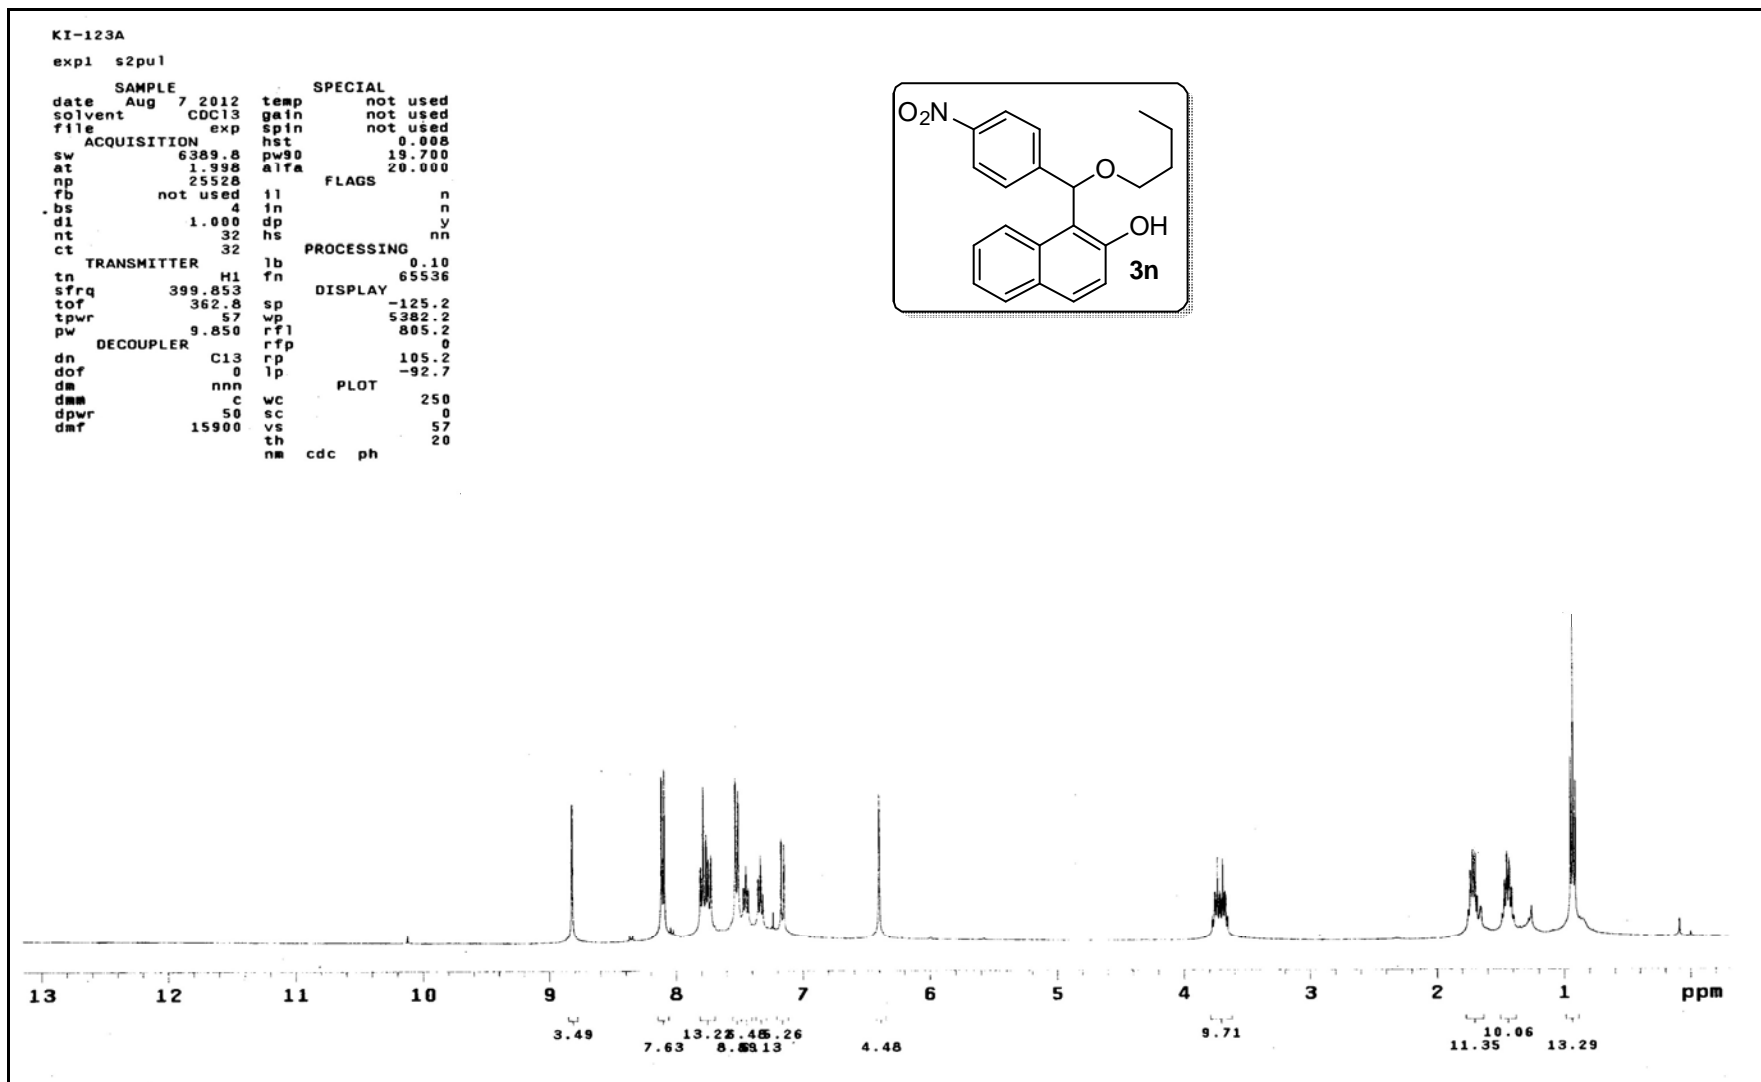

# <sup>13</sup>C NMR spectra of 3n

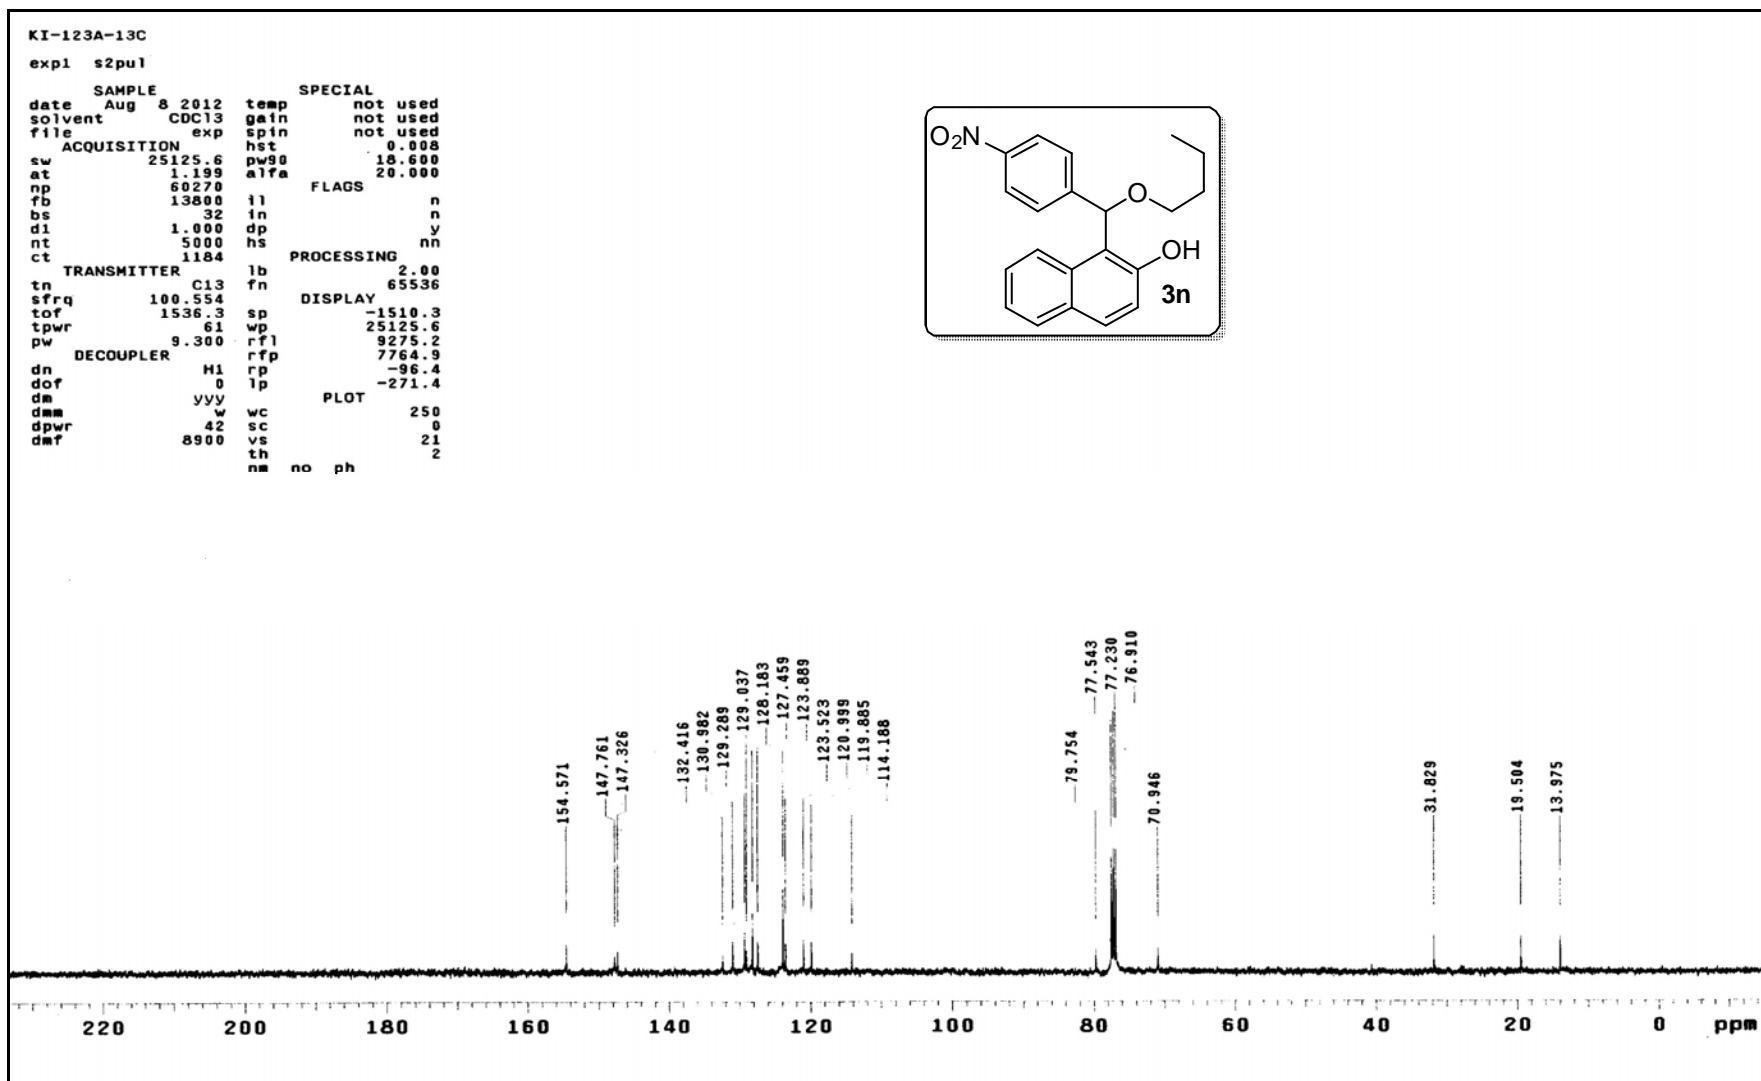



# <sup>1</sup>H NMR spectra of 3o

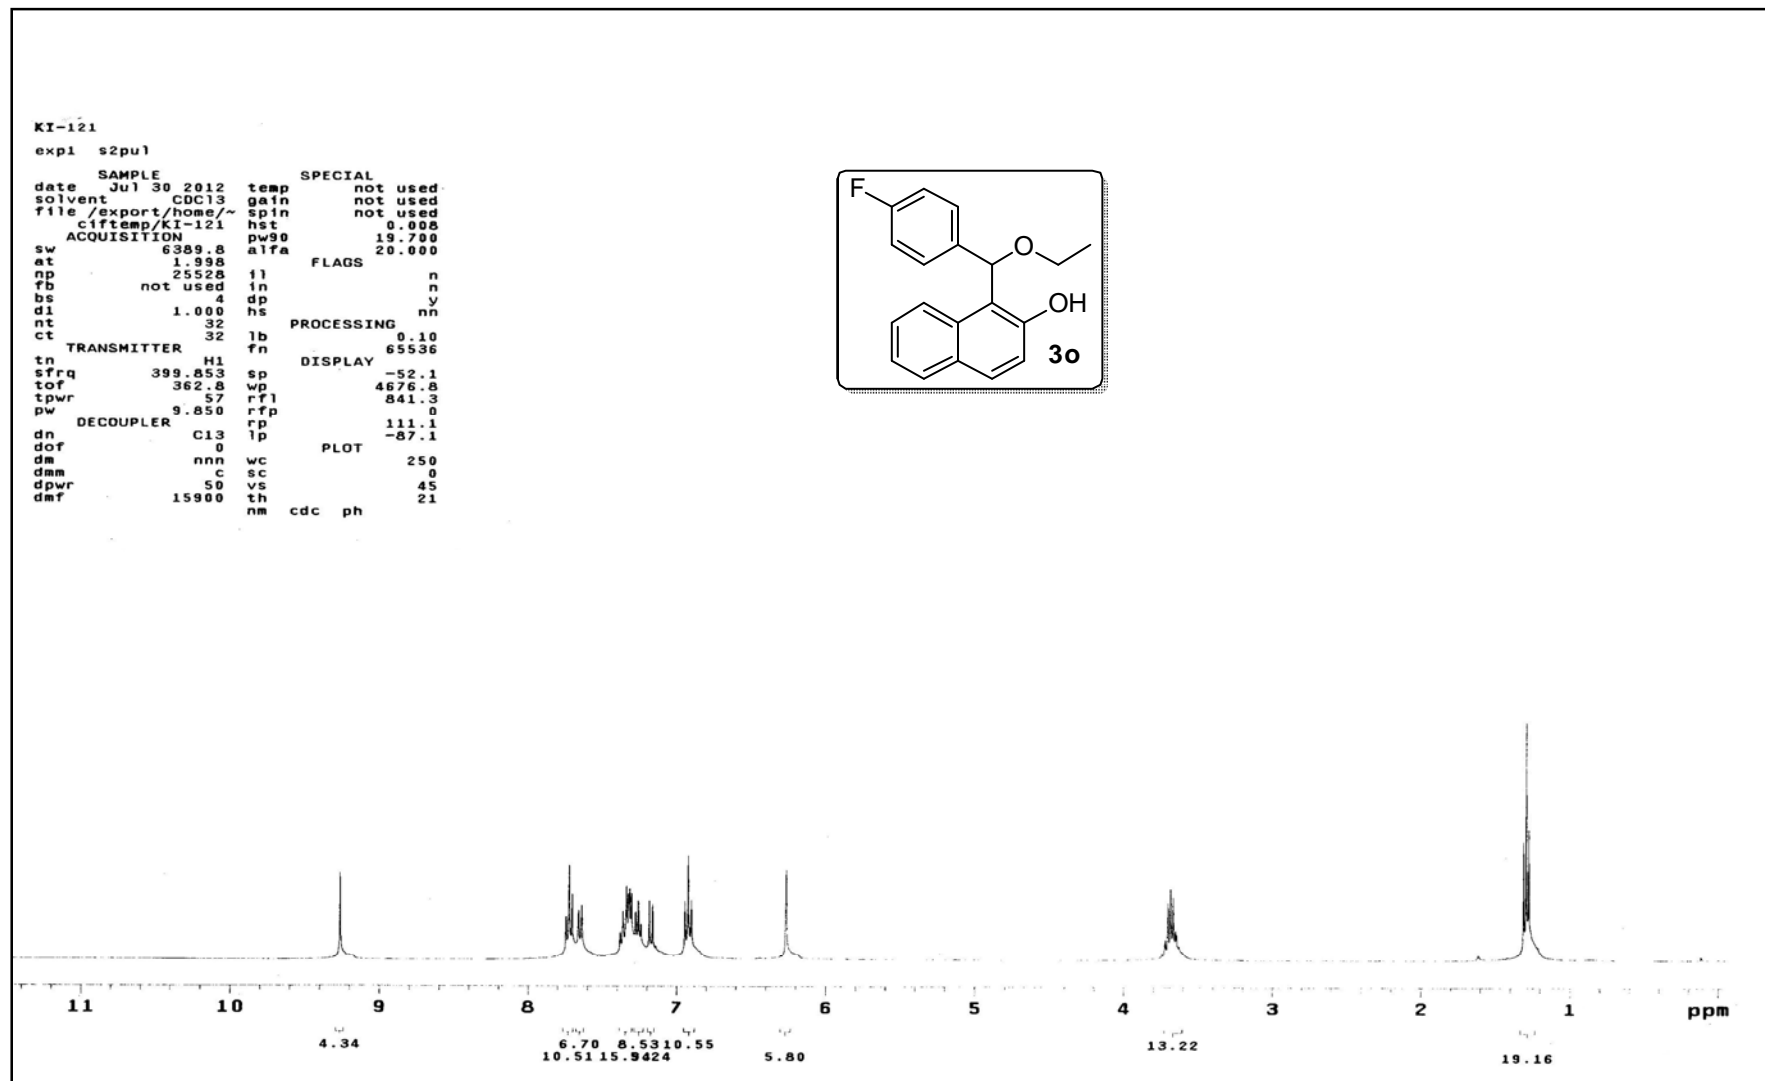

# <sup>13</sup>C NMR spectra of 3o

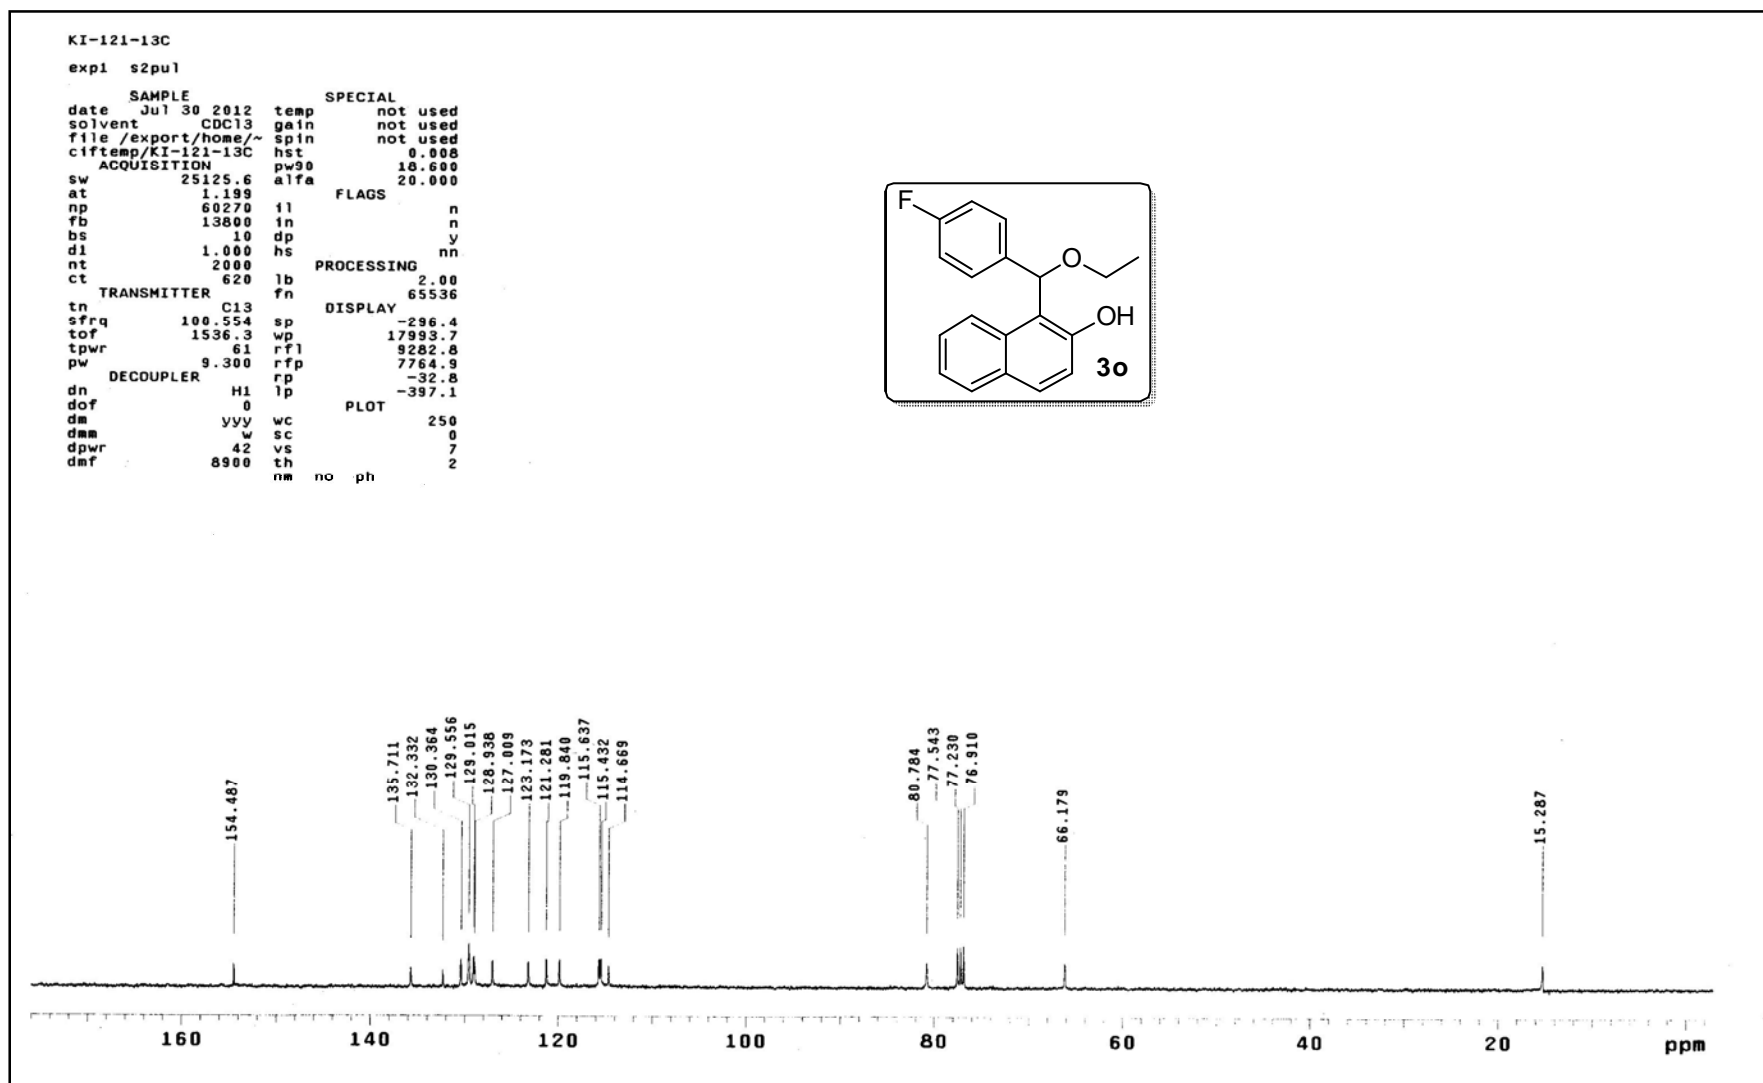

# <sup>1</sup>H NMR spectra of 3p

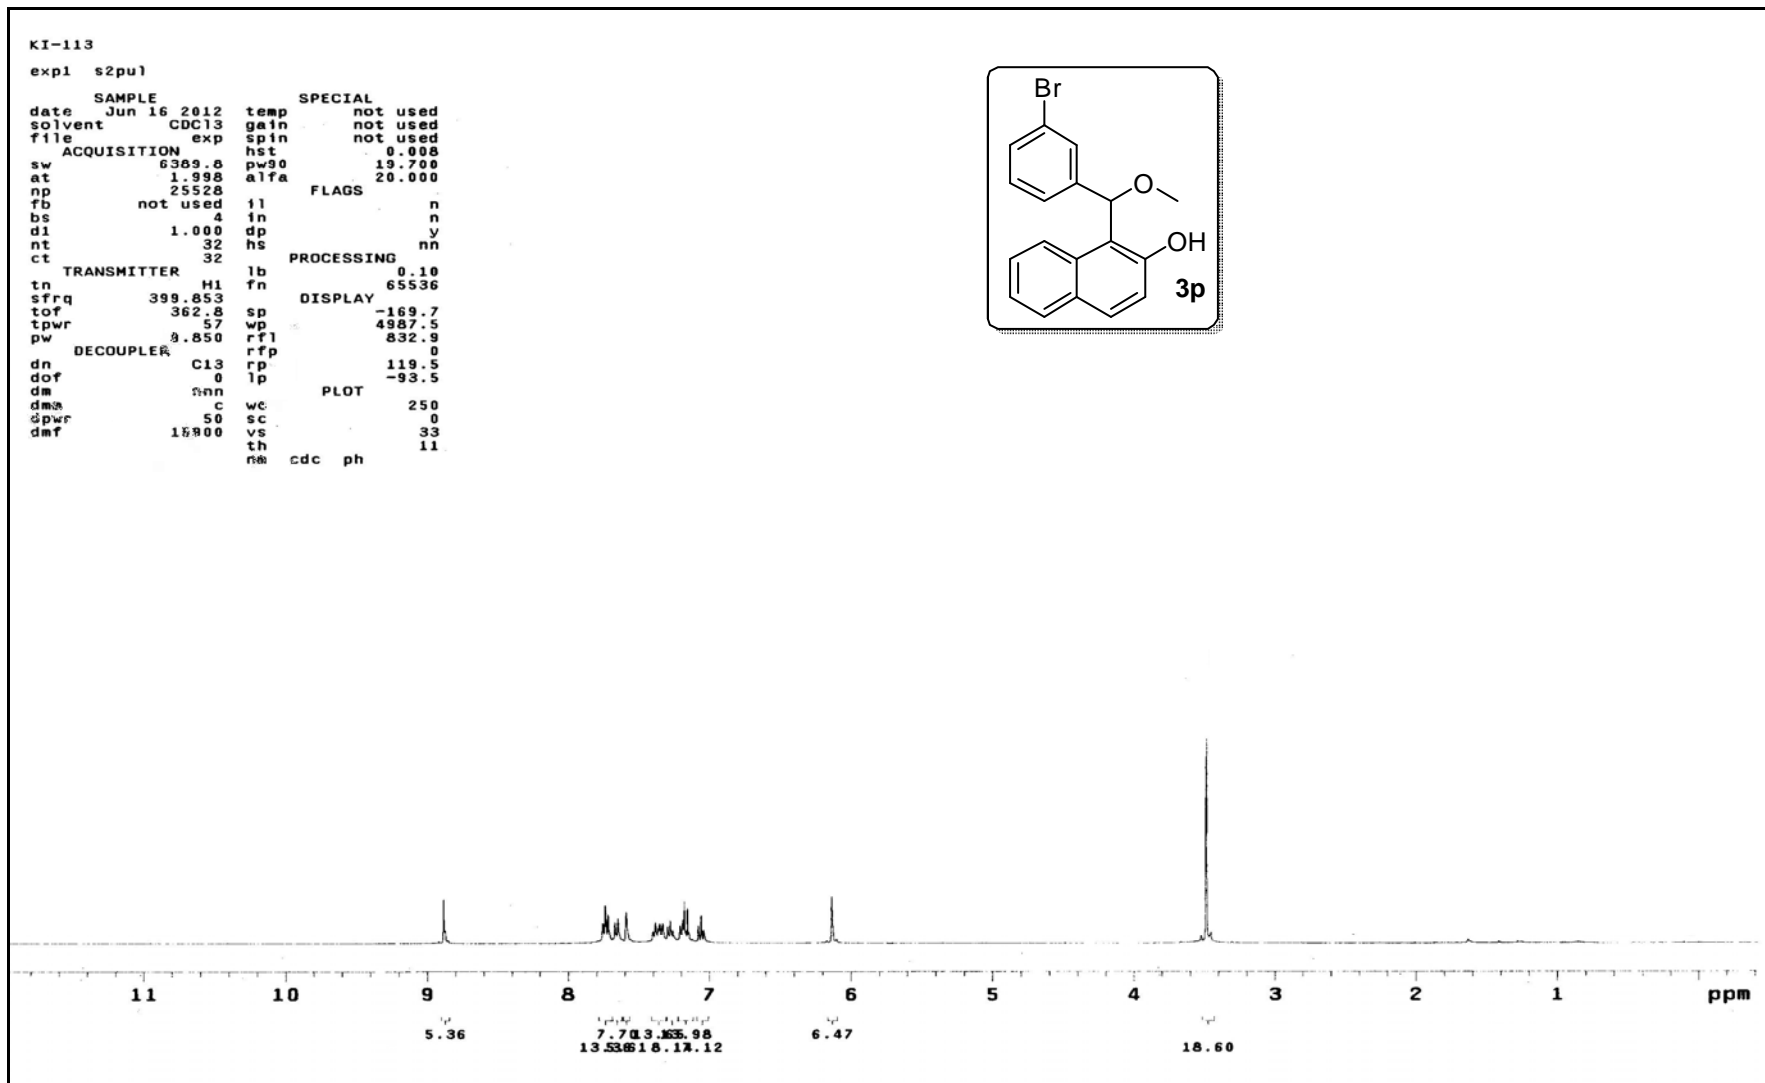

# <sup>13</sup>C NMR spectra of 3p

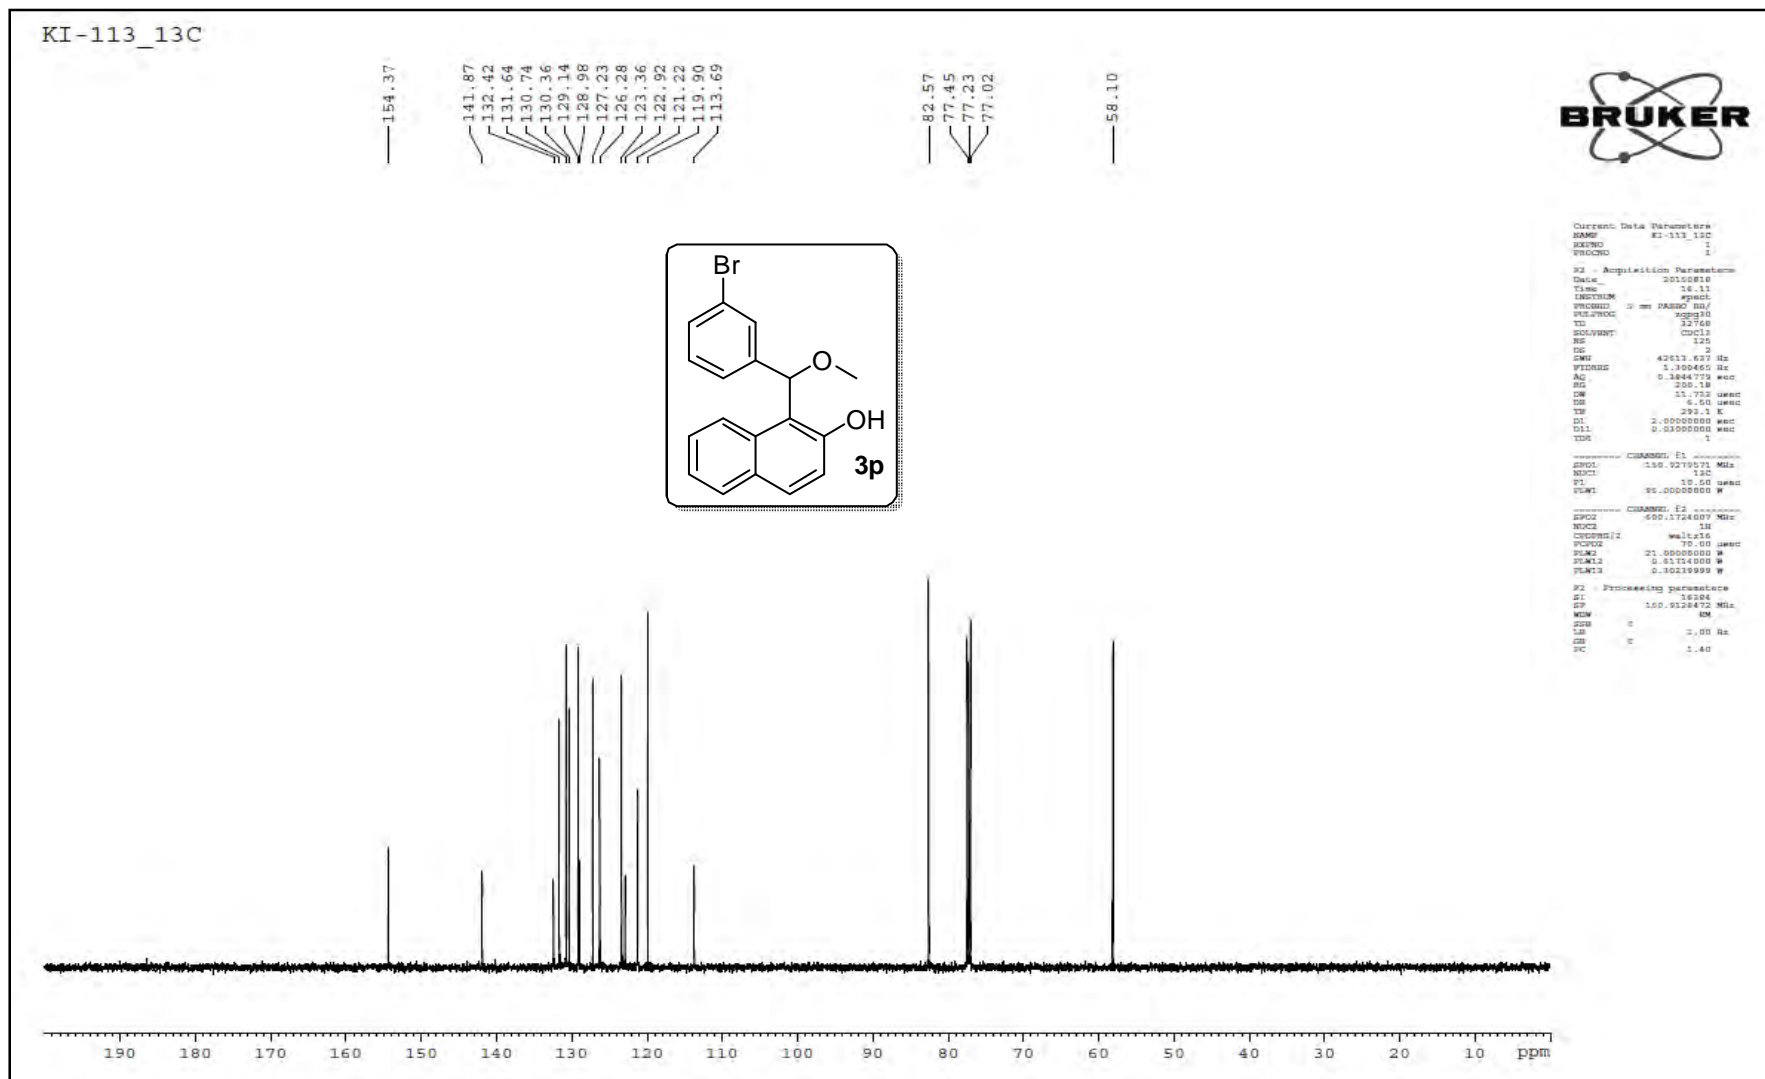

MS Spectra of 3p

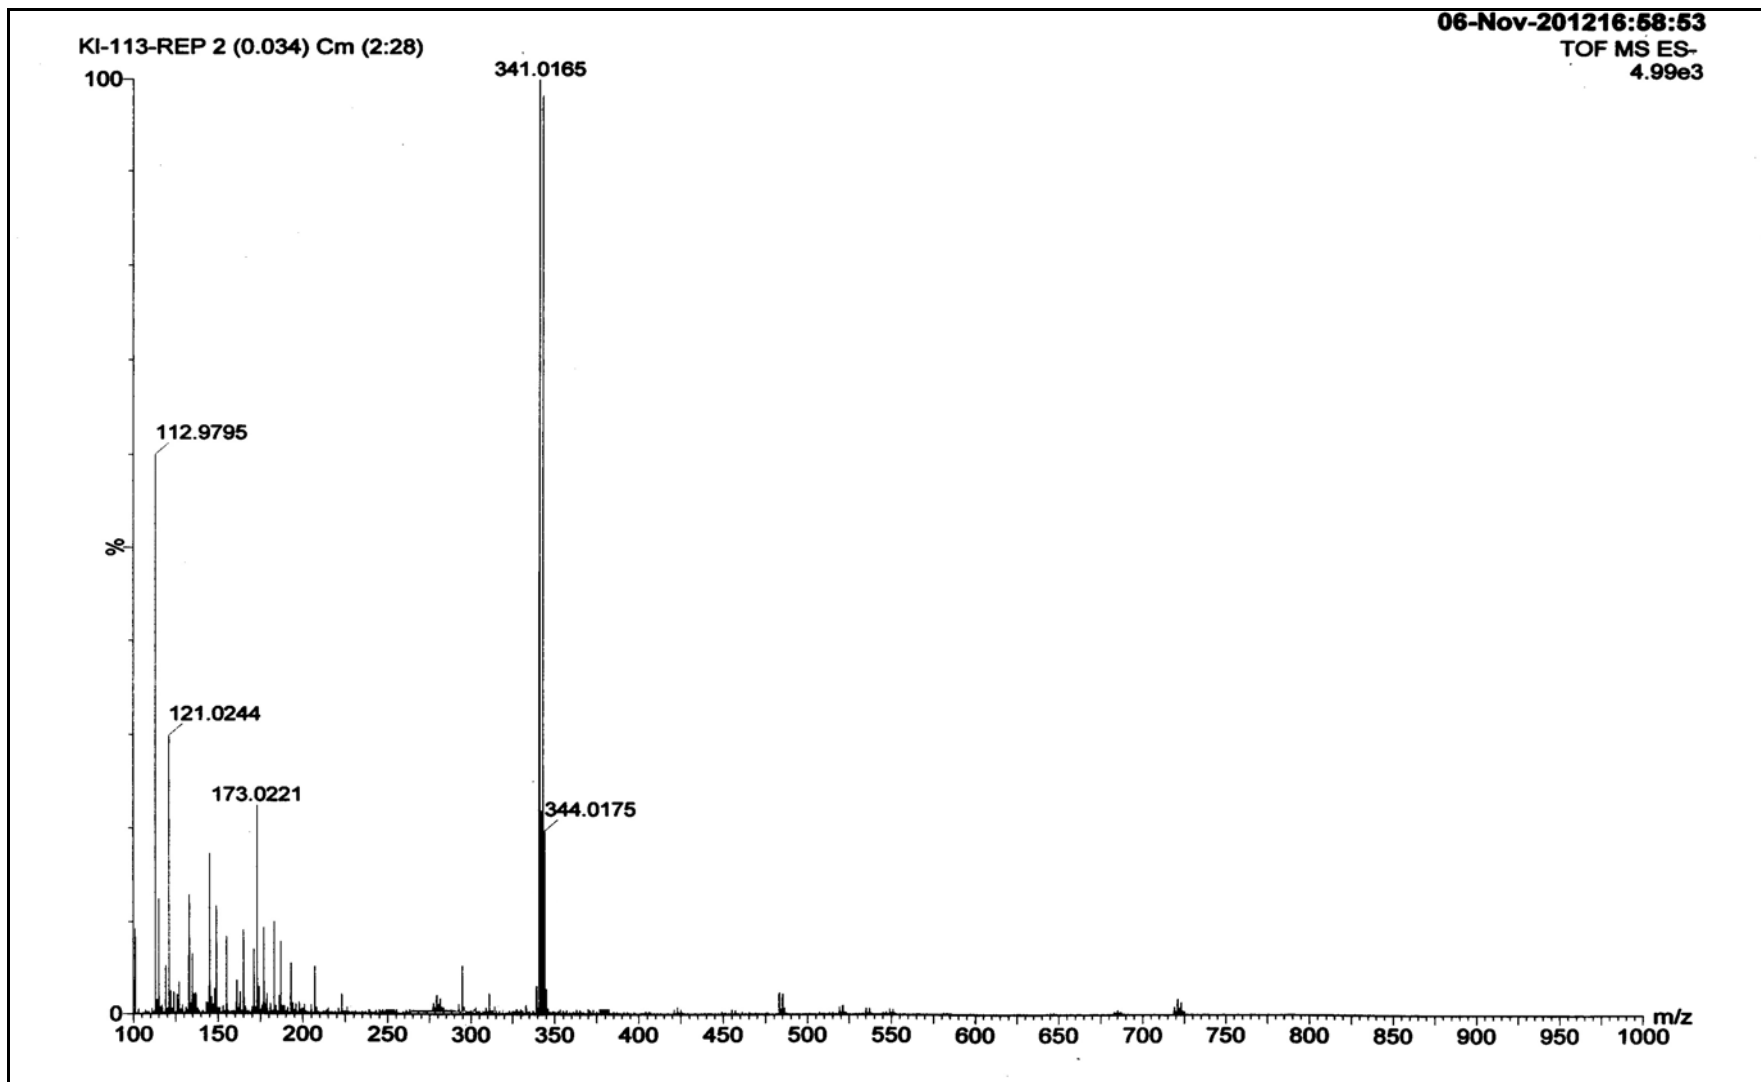

# <sup>1</sup>H NMR spectra of 3q

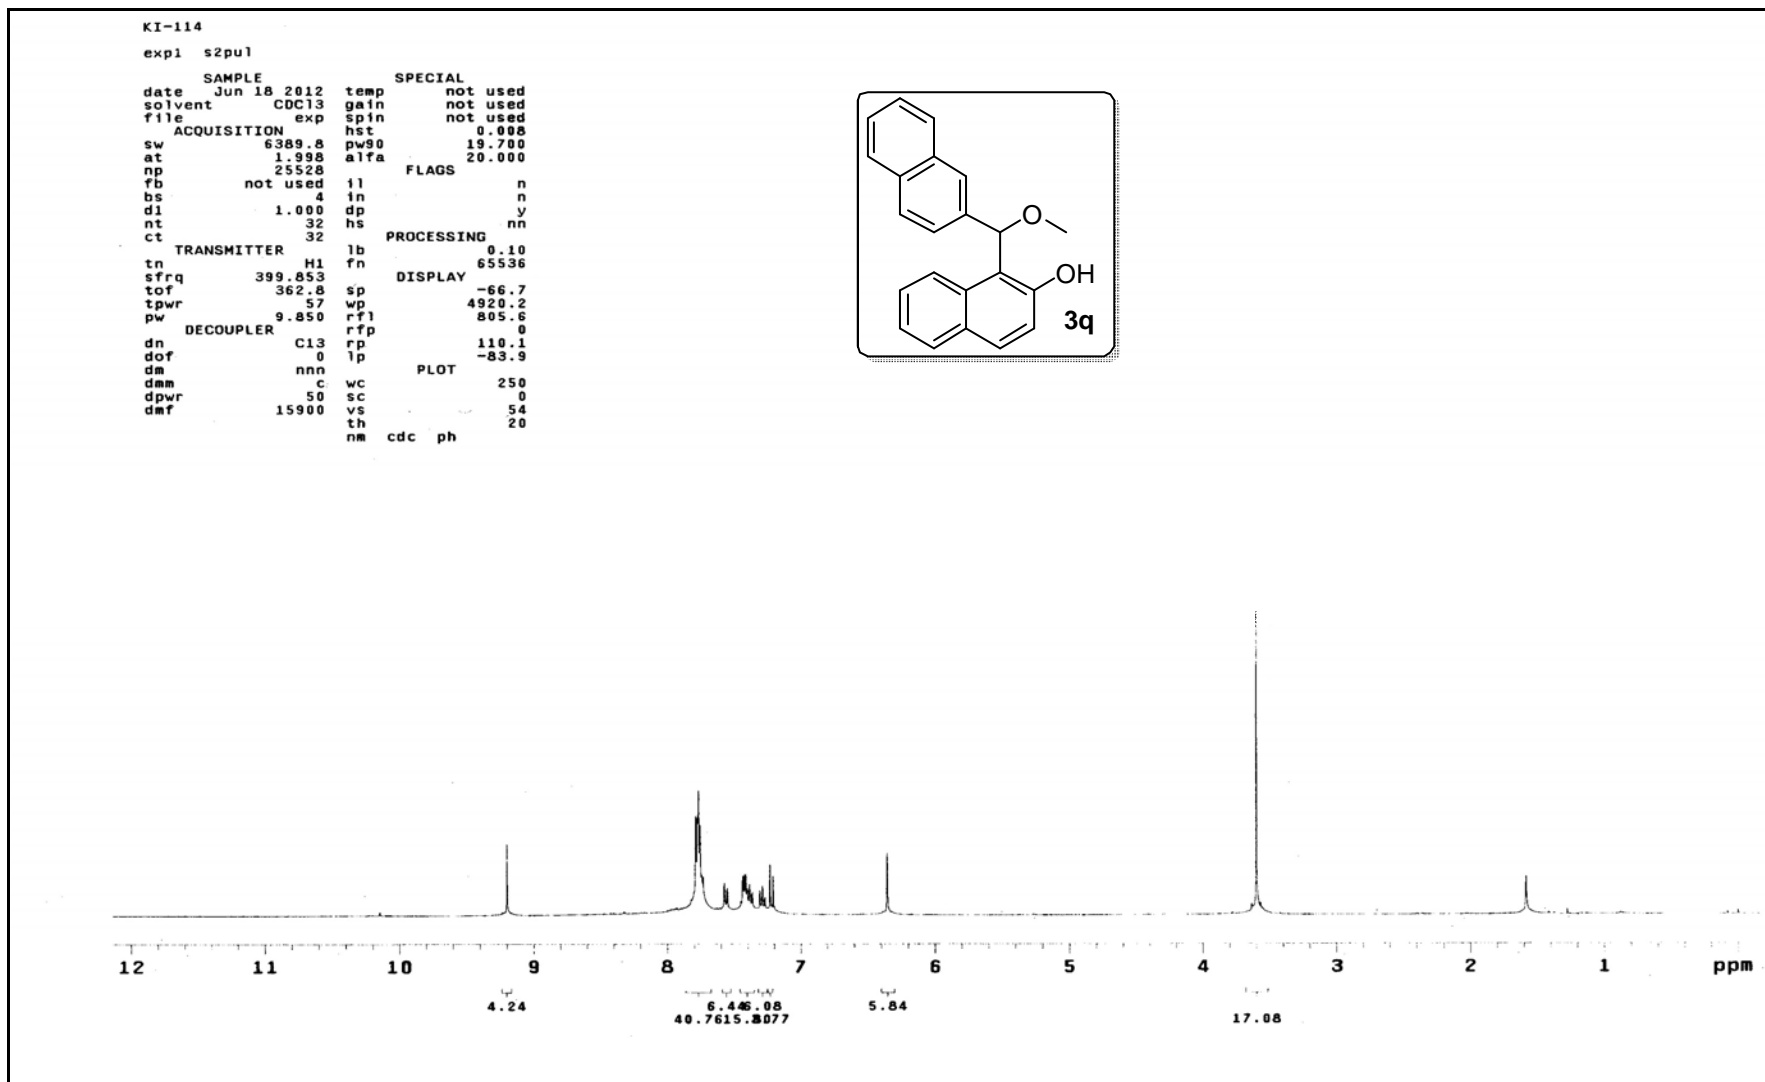

<sup>13</sup>C NMR spectra of 3q

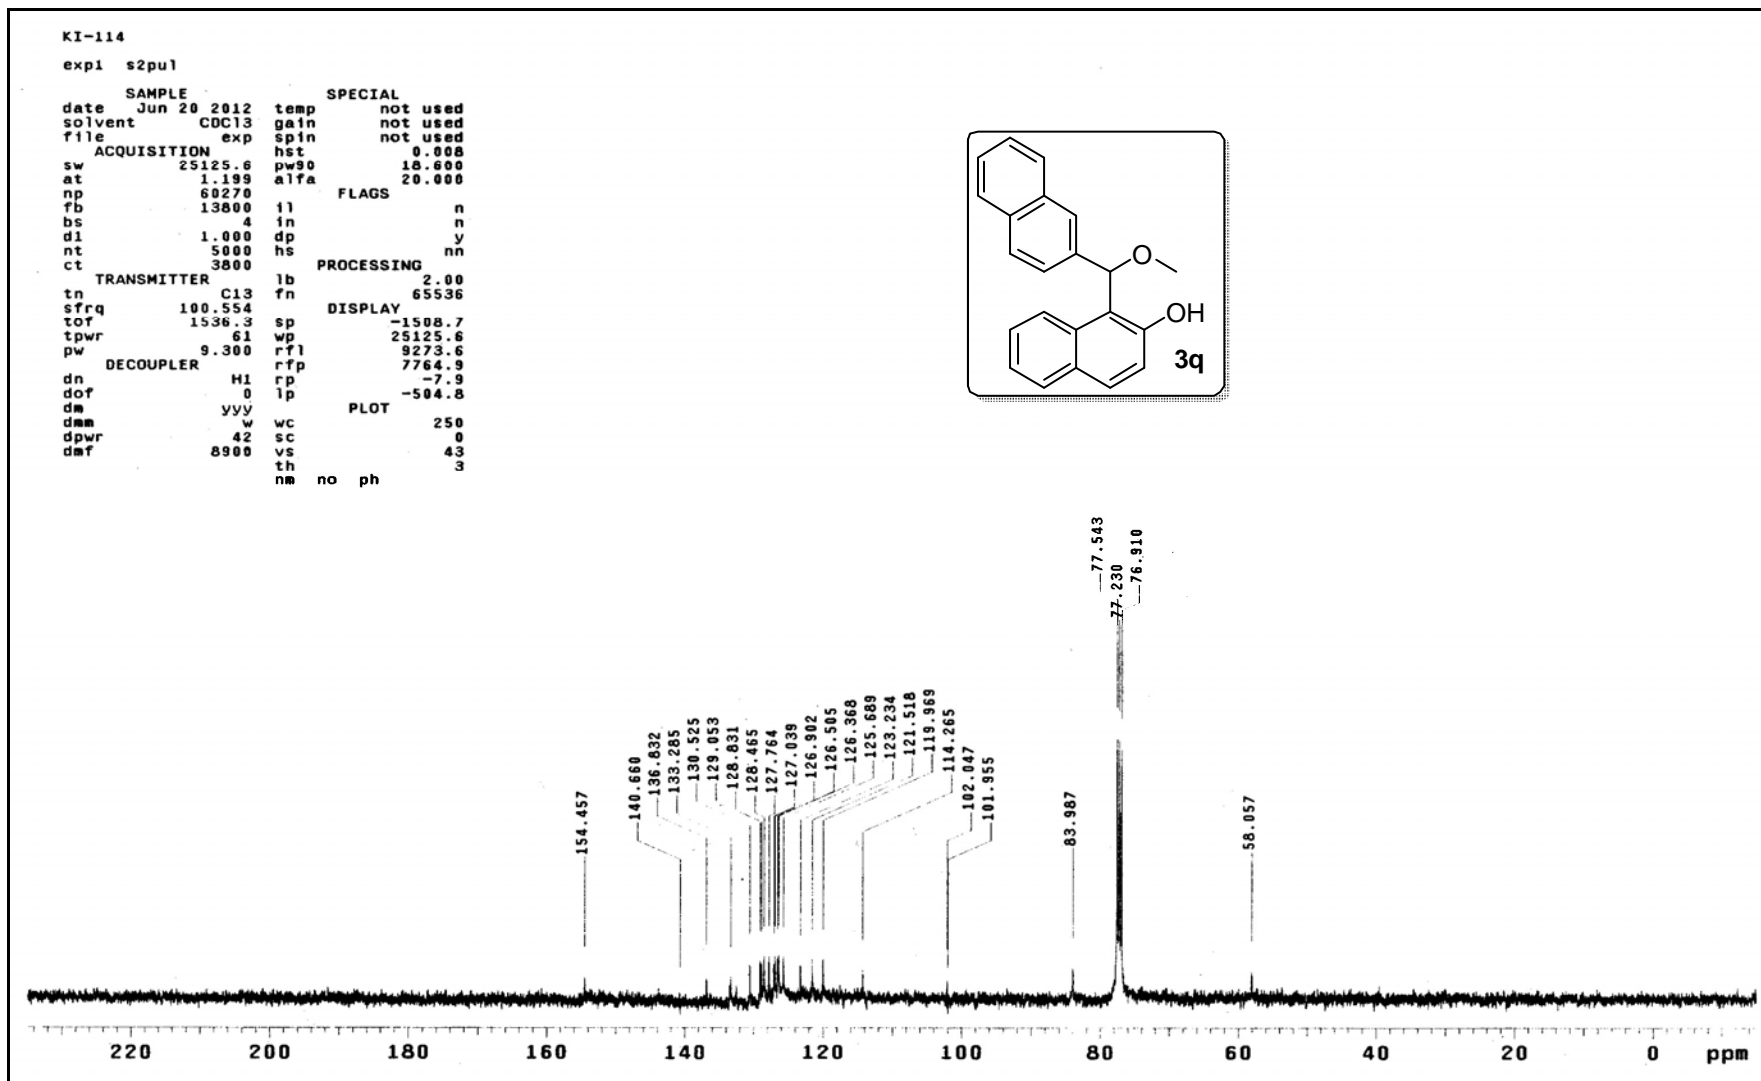

# <sup>1</sup>H NMR spectra of 8

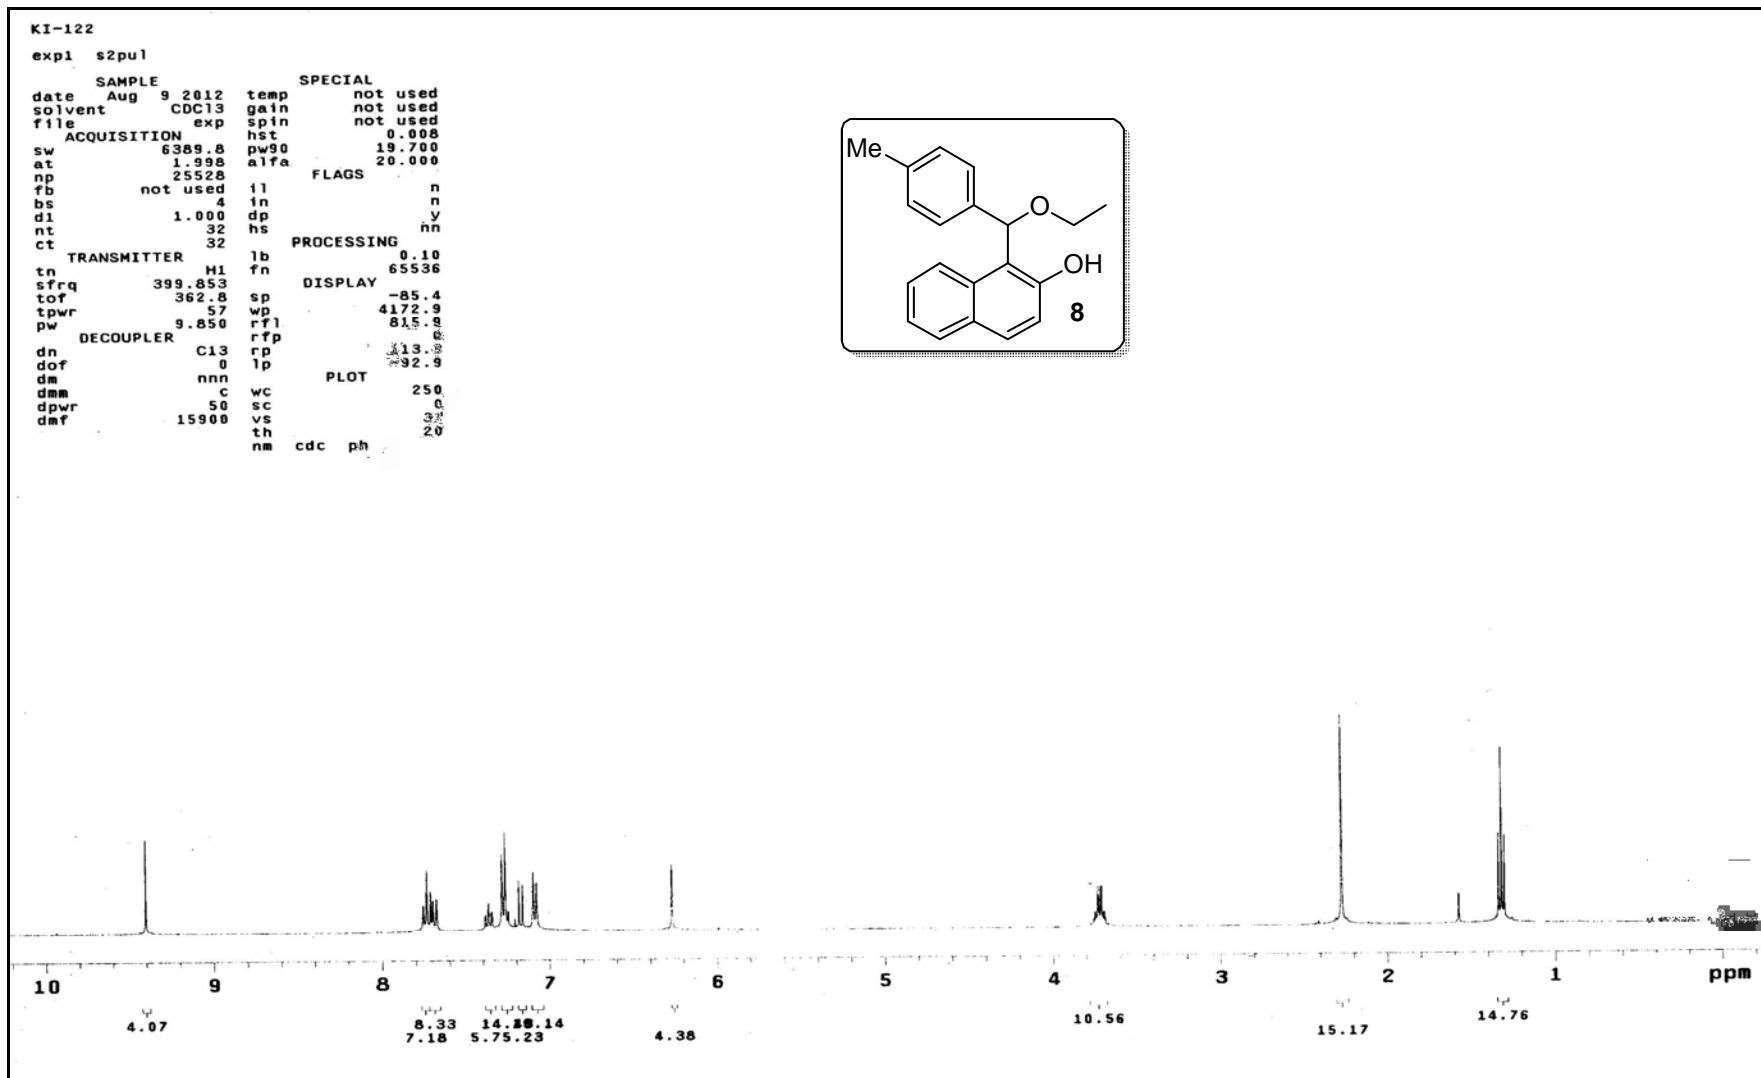



# <sup>13</sup>C NMR Spectra of 8

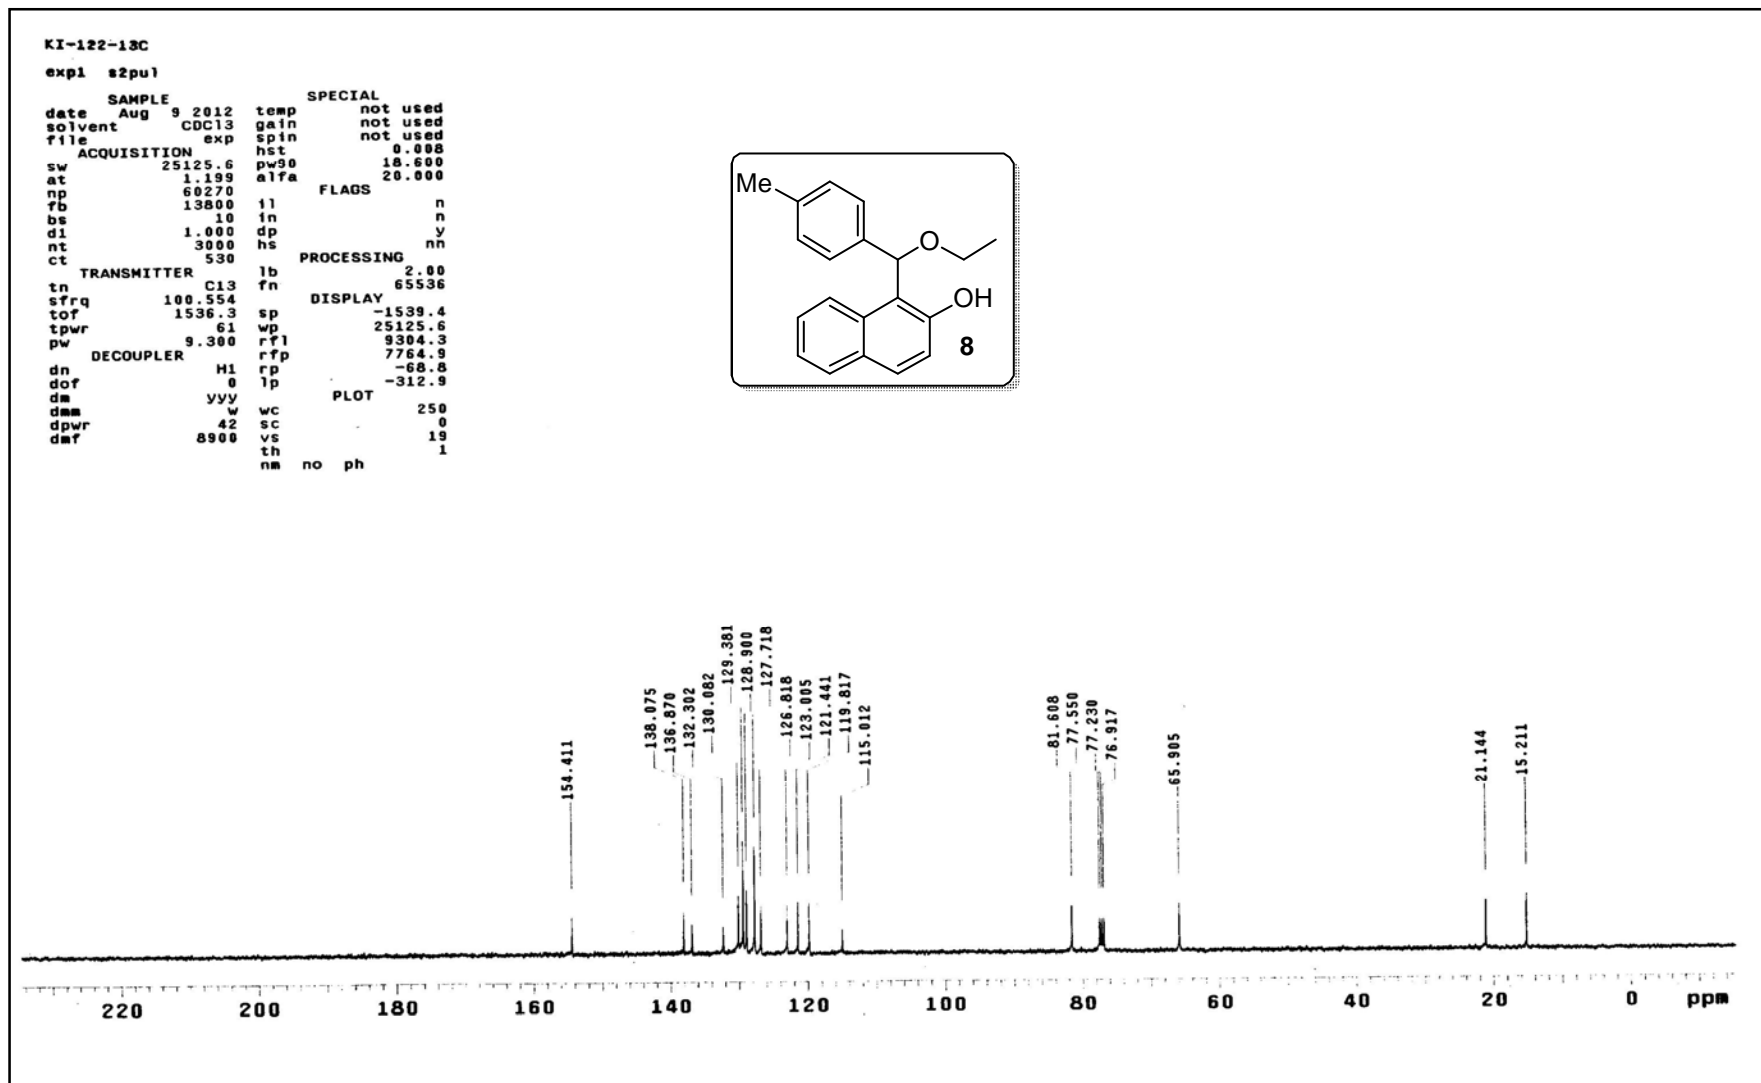

# <sup>1</sup>H NMR spectra of 7a

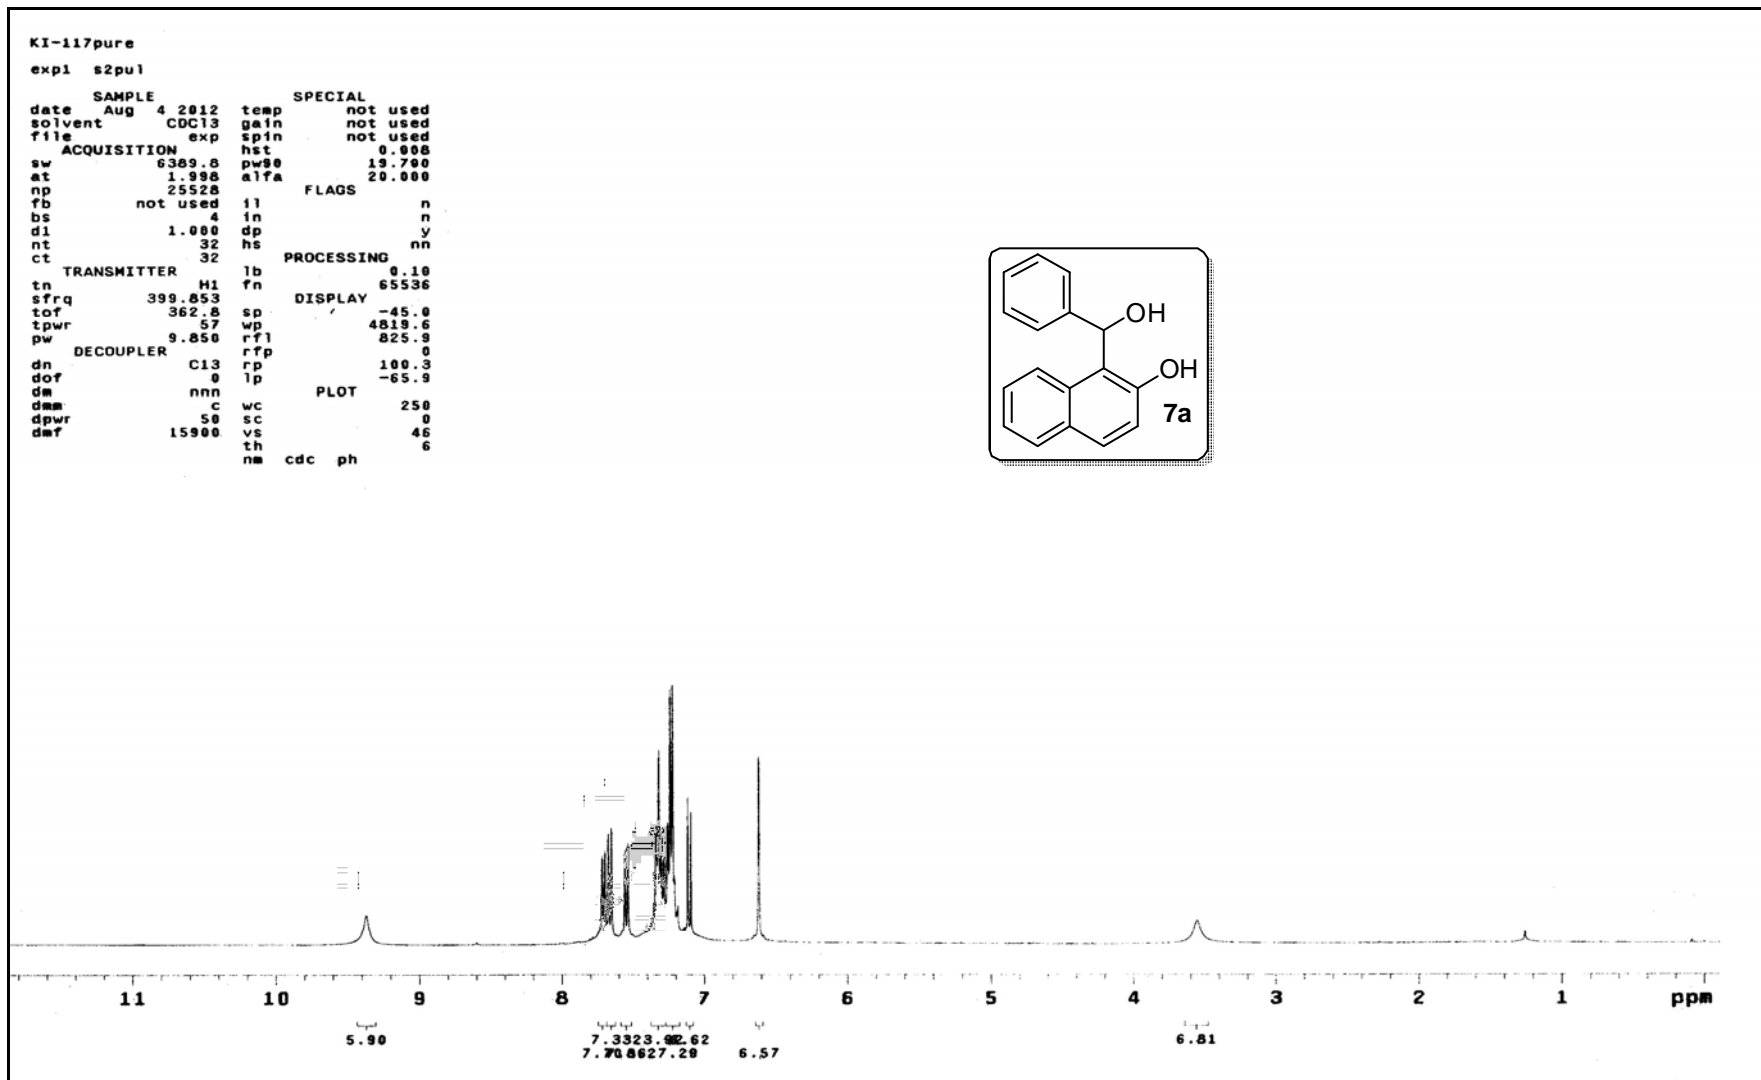

# <sup>13</sup>C NMR spectra of 7a

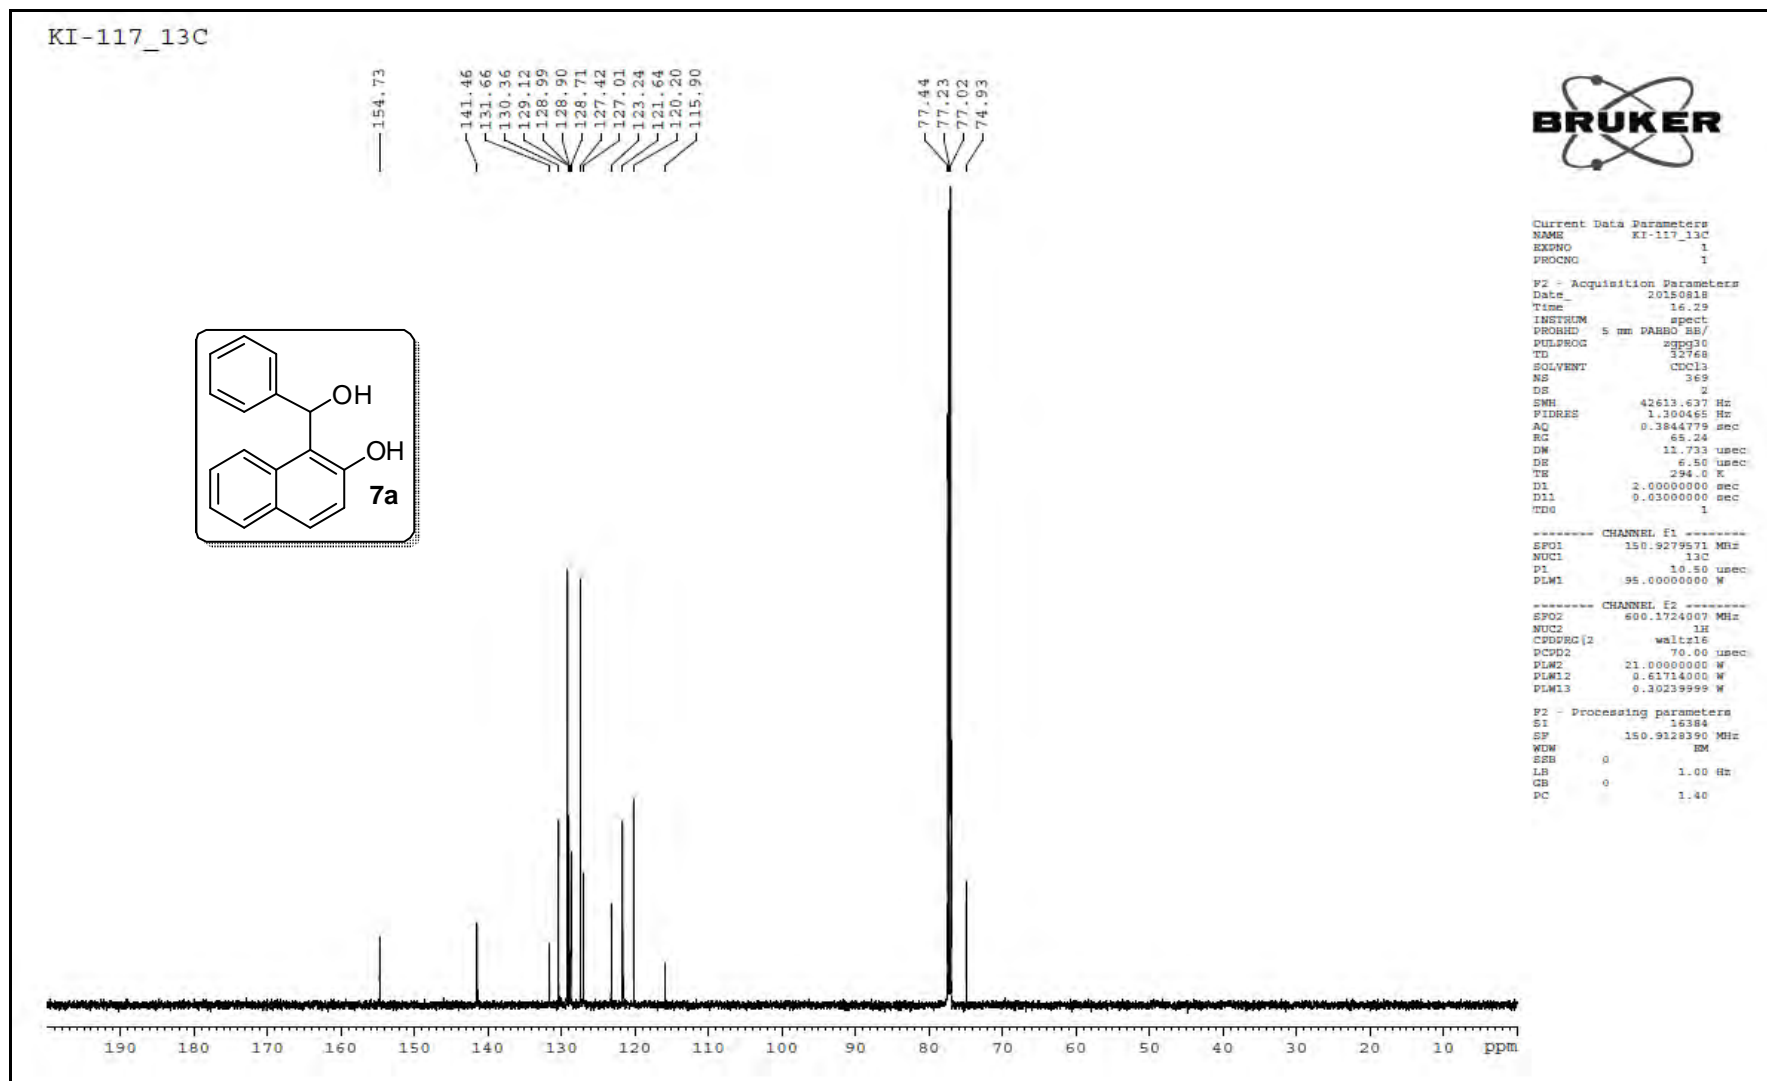

MS spectra of 7a

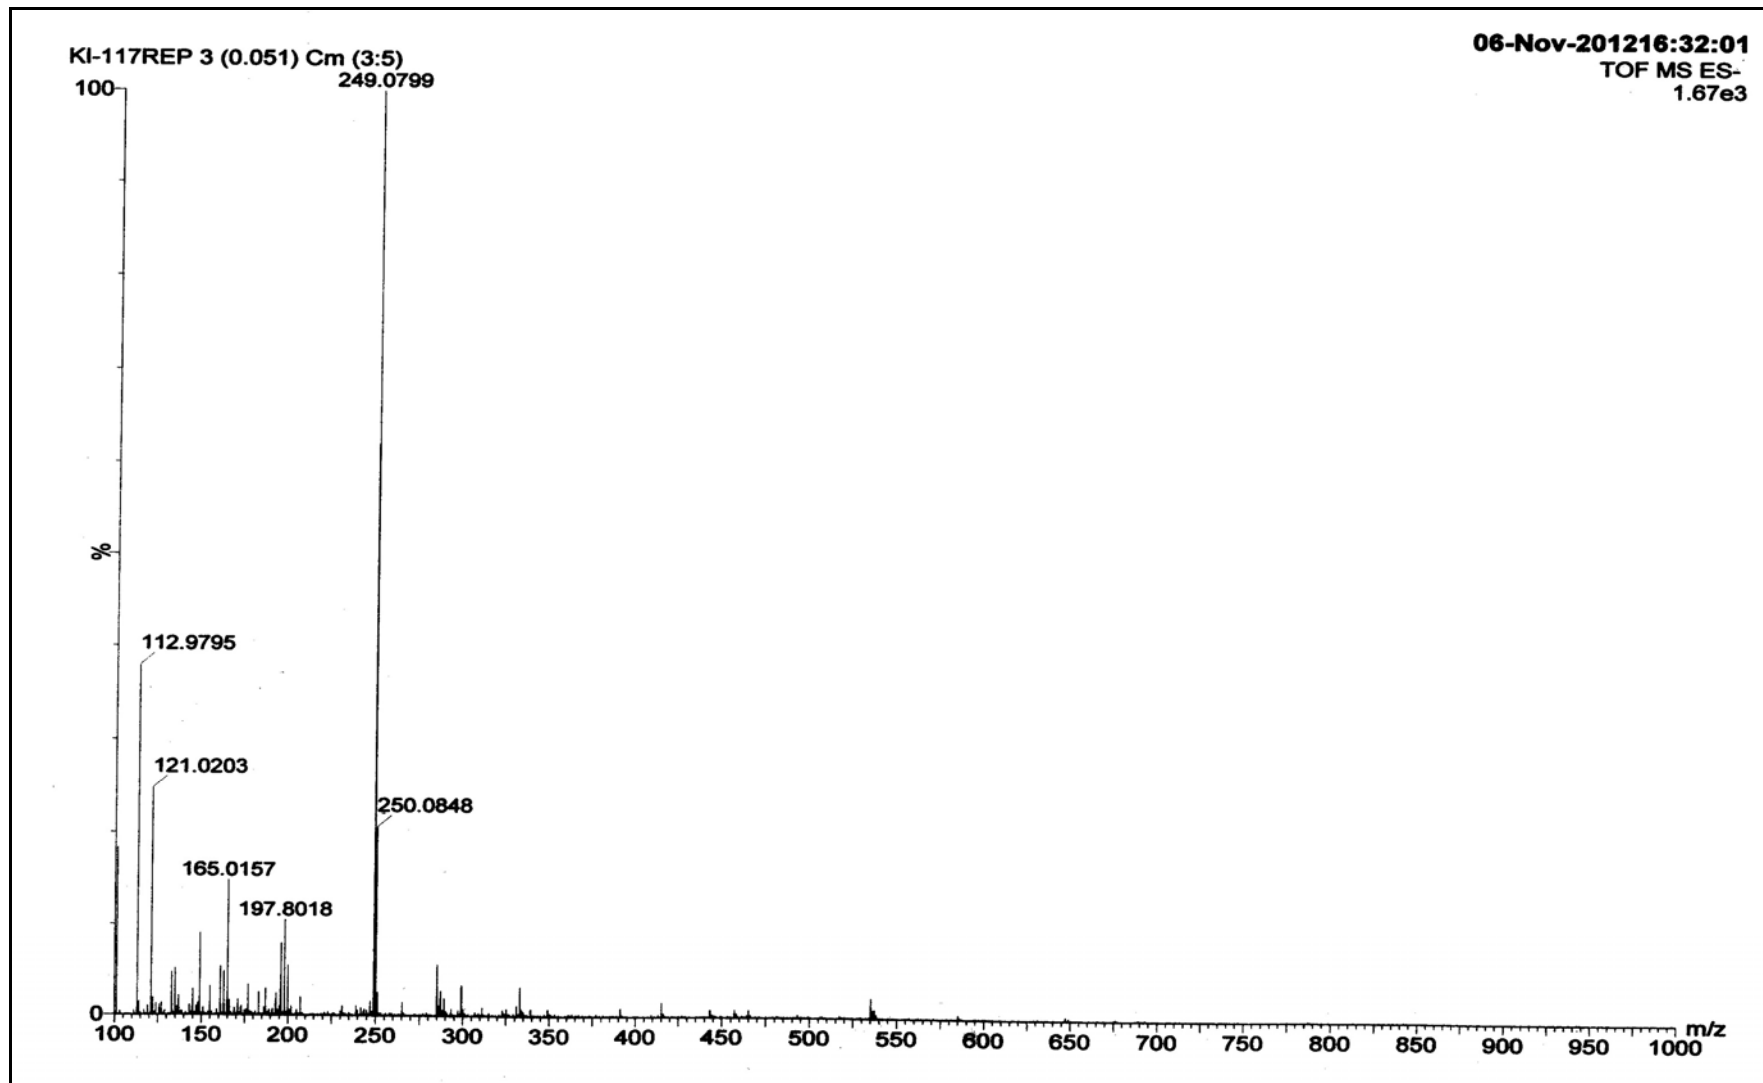

# <sup>1</sup>H NMR spectra of 7b

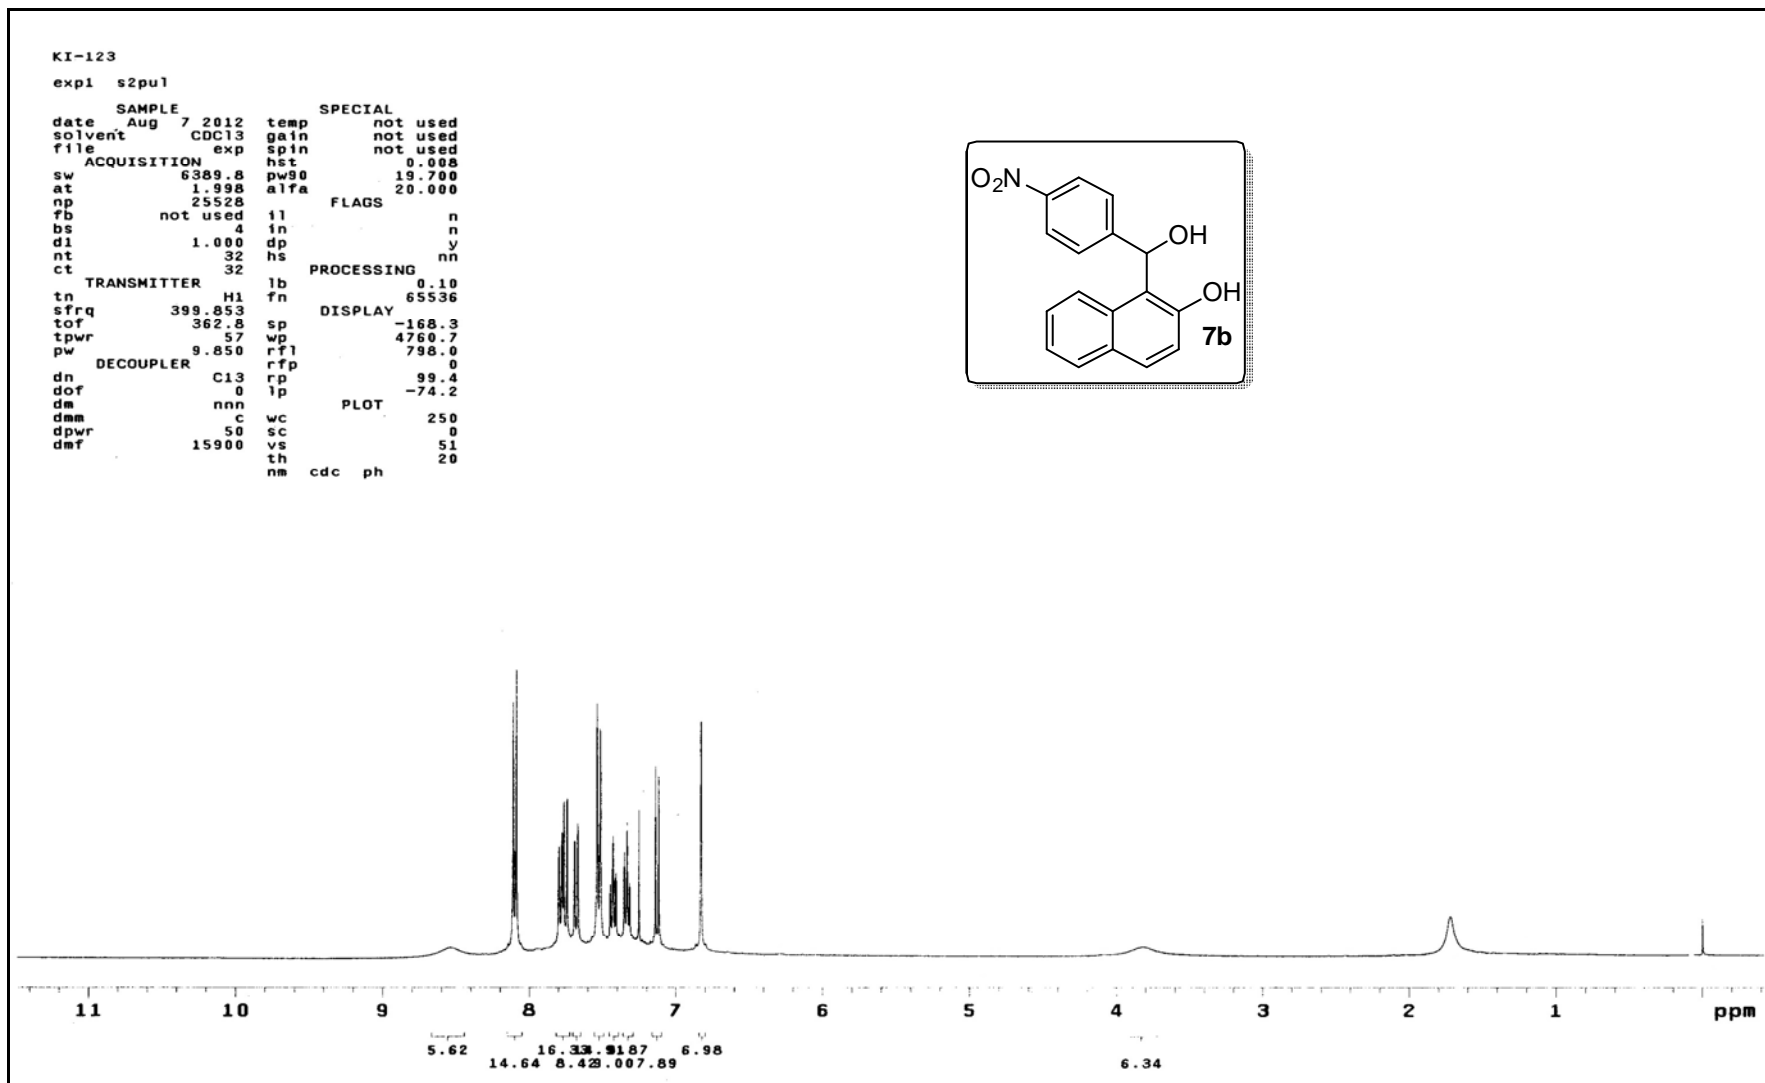

<sup>13</sup>C NMR spectra of 7b

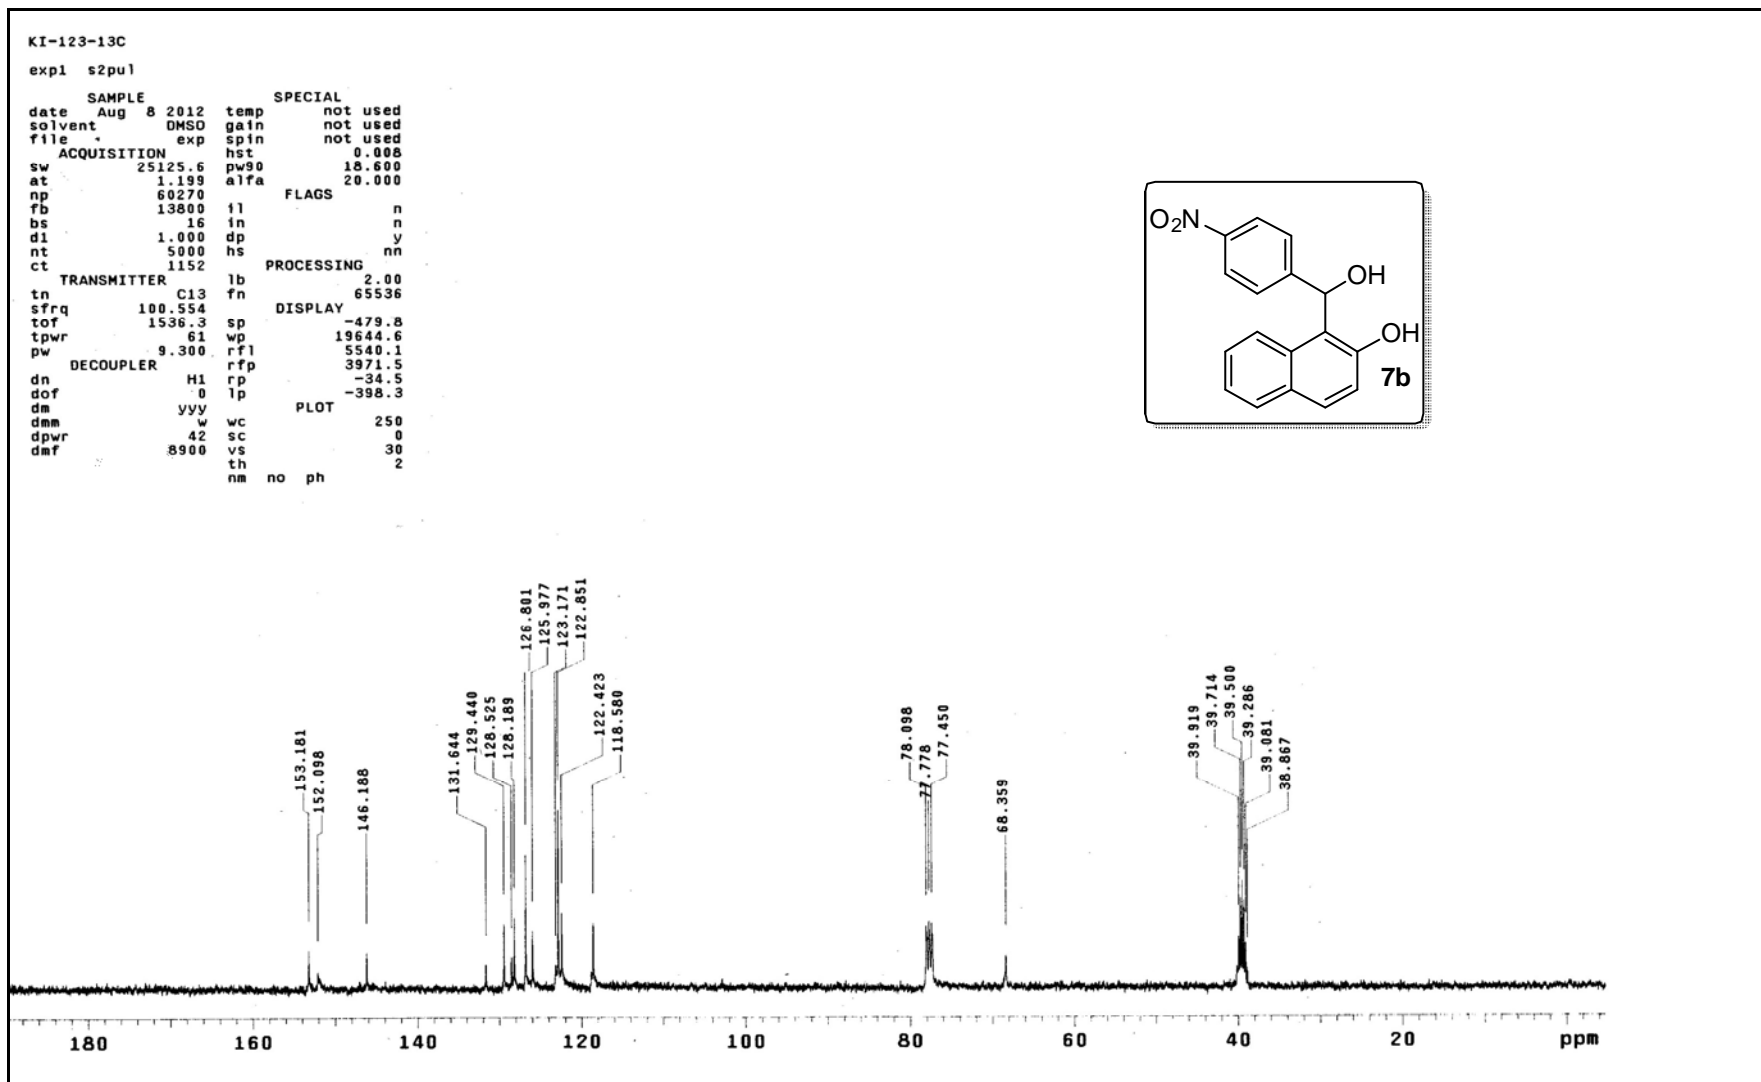

# <sup>1</sup>H NMR spectra of 7c

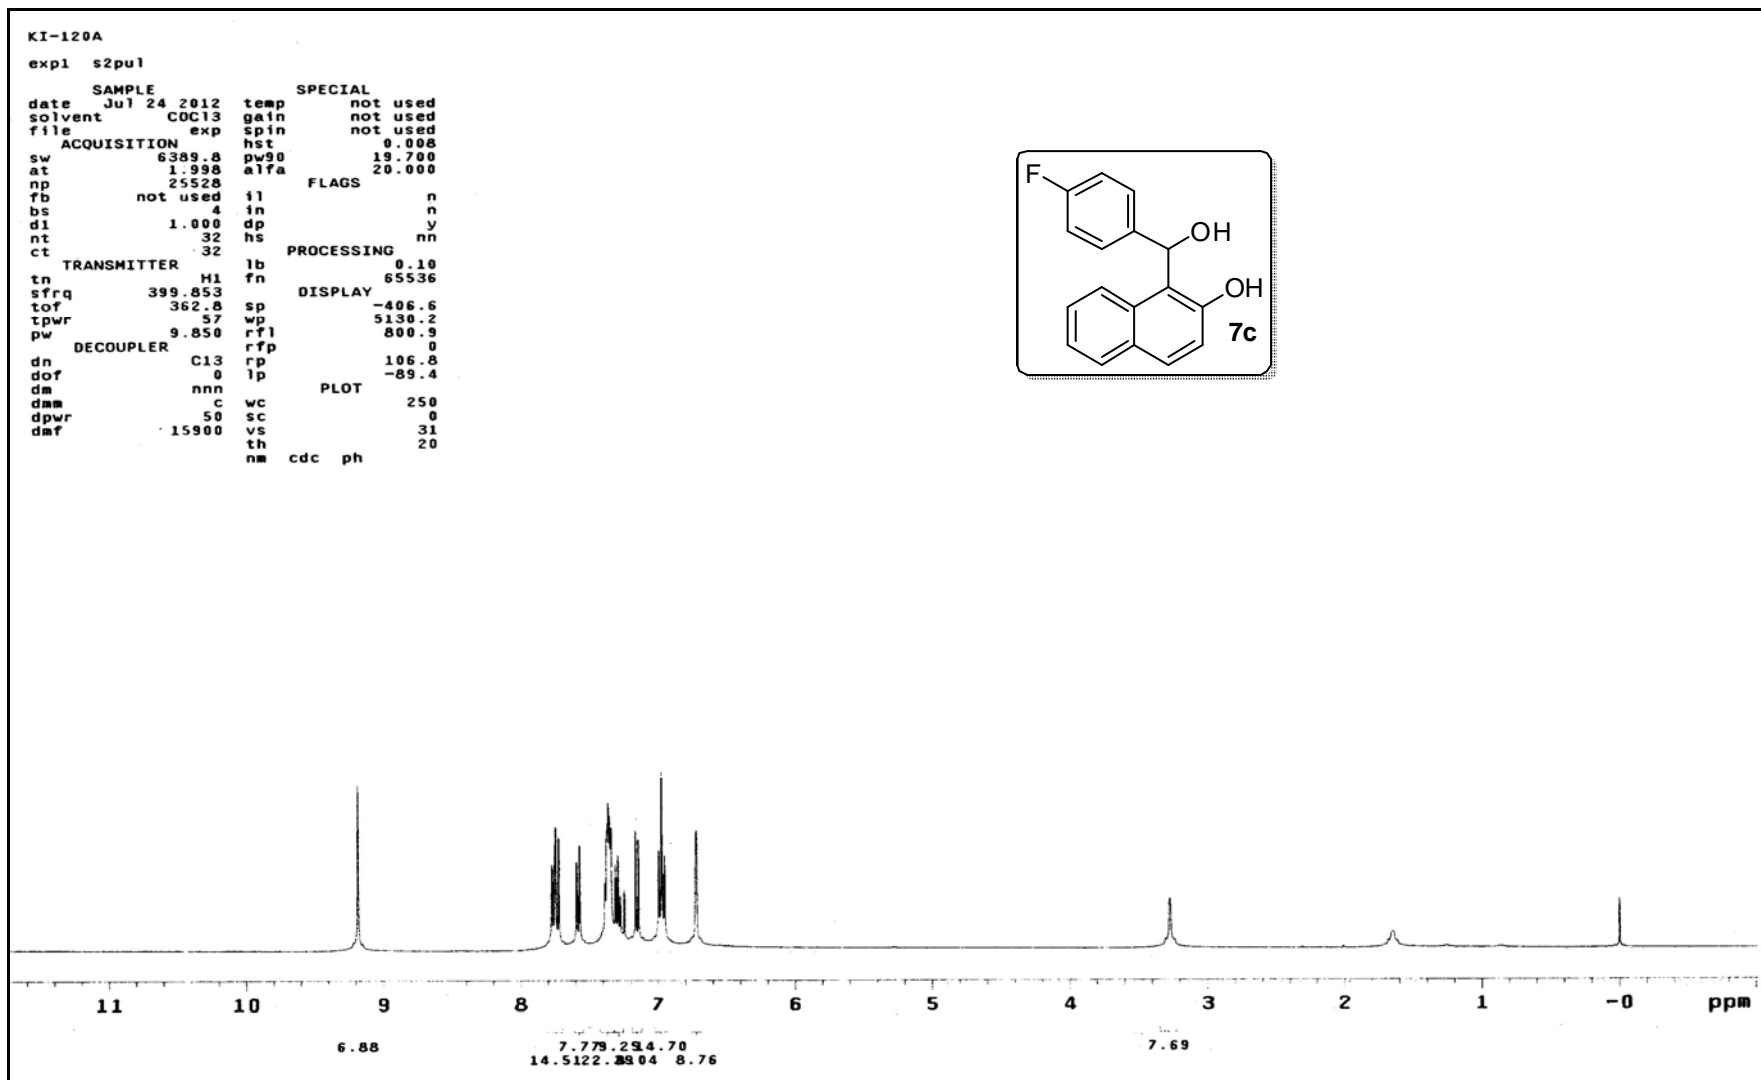

<sup>13</sup>C NMR spectra of 7c

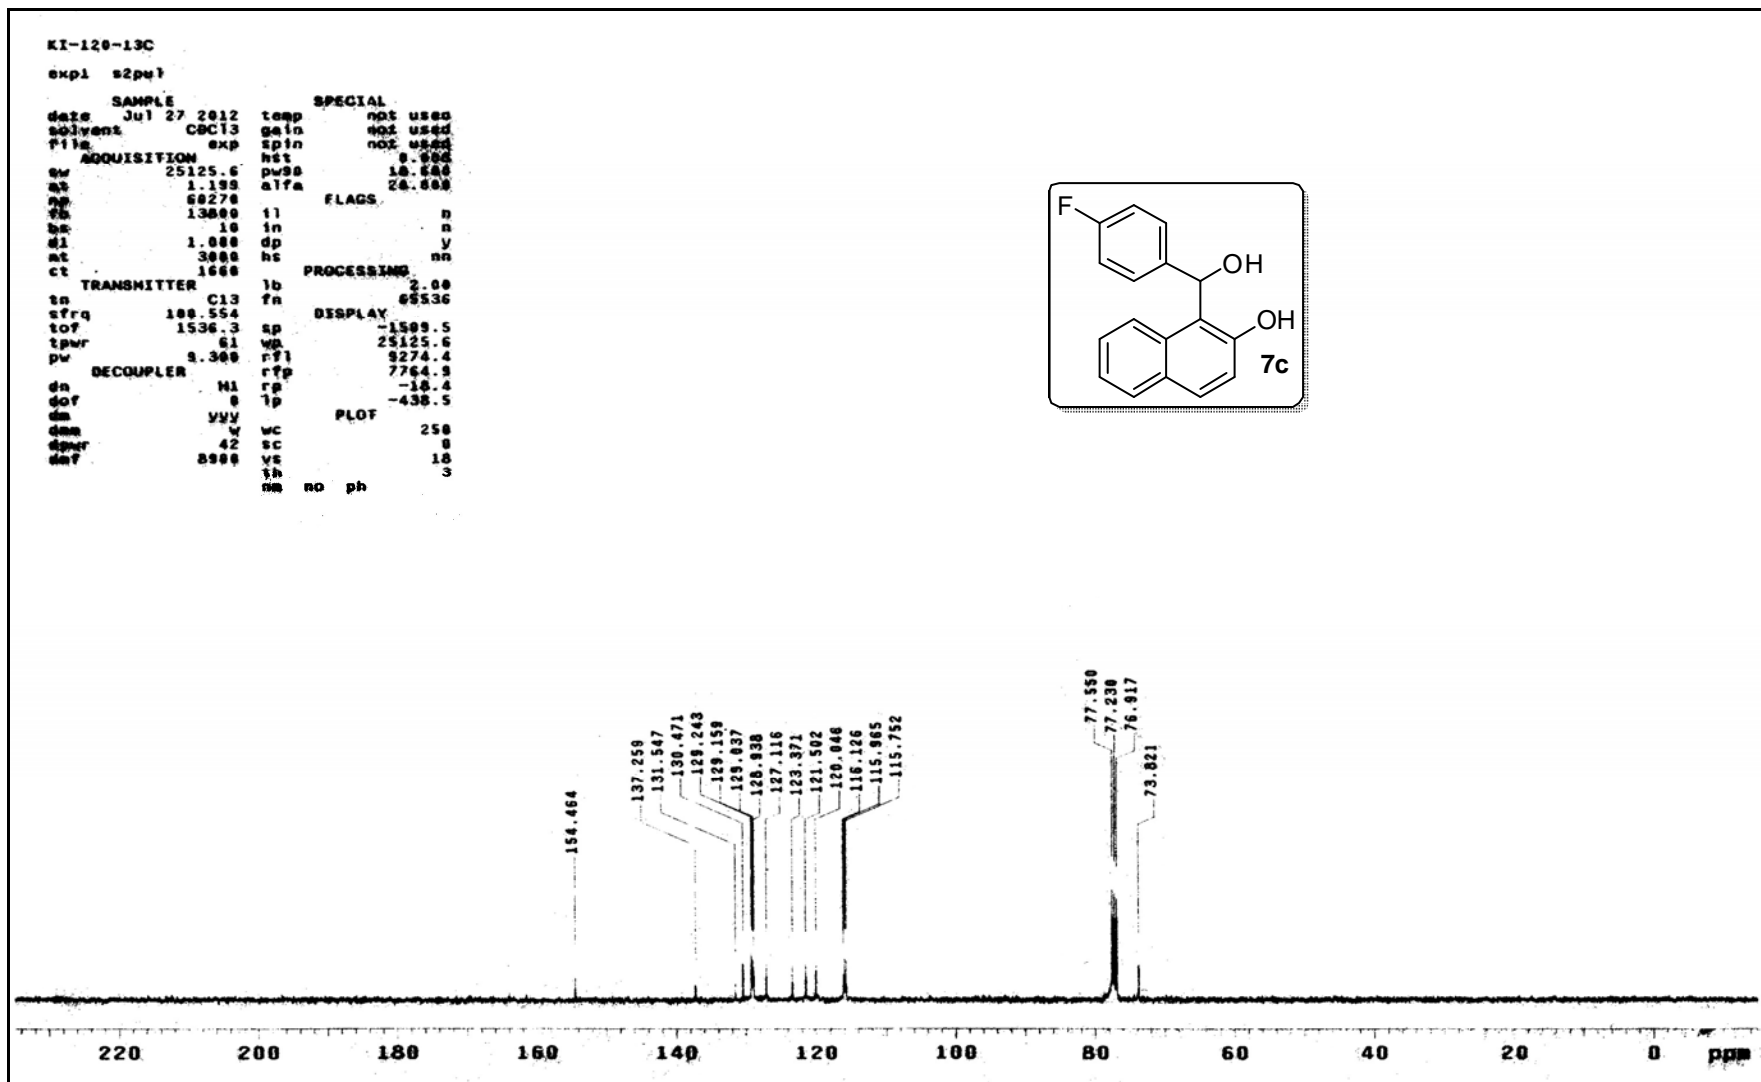



<sup>1</sup>H NMR spectra of 7c (D<sub>2</sub>O exchange)

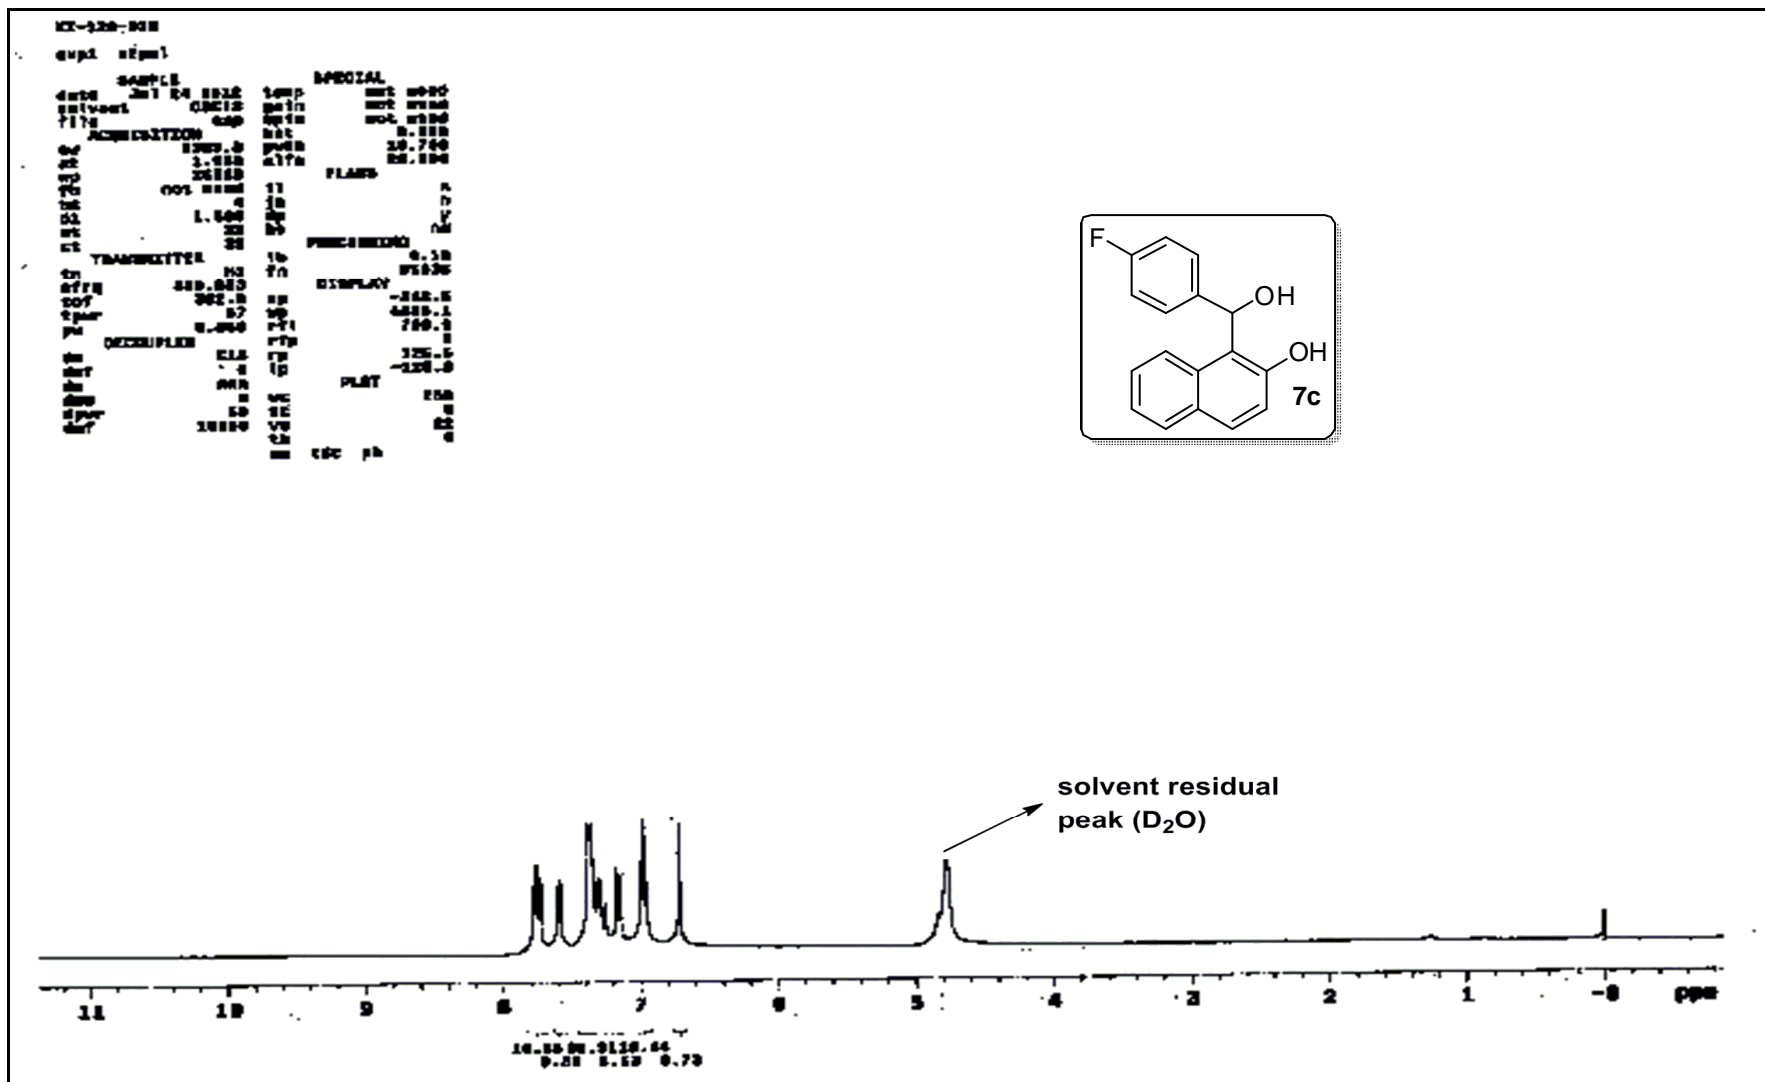

MS spectra of 7c

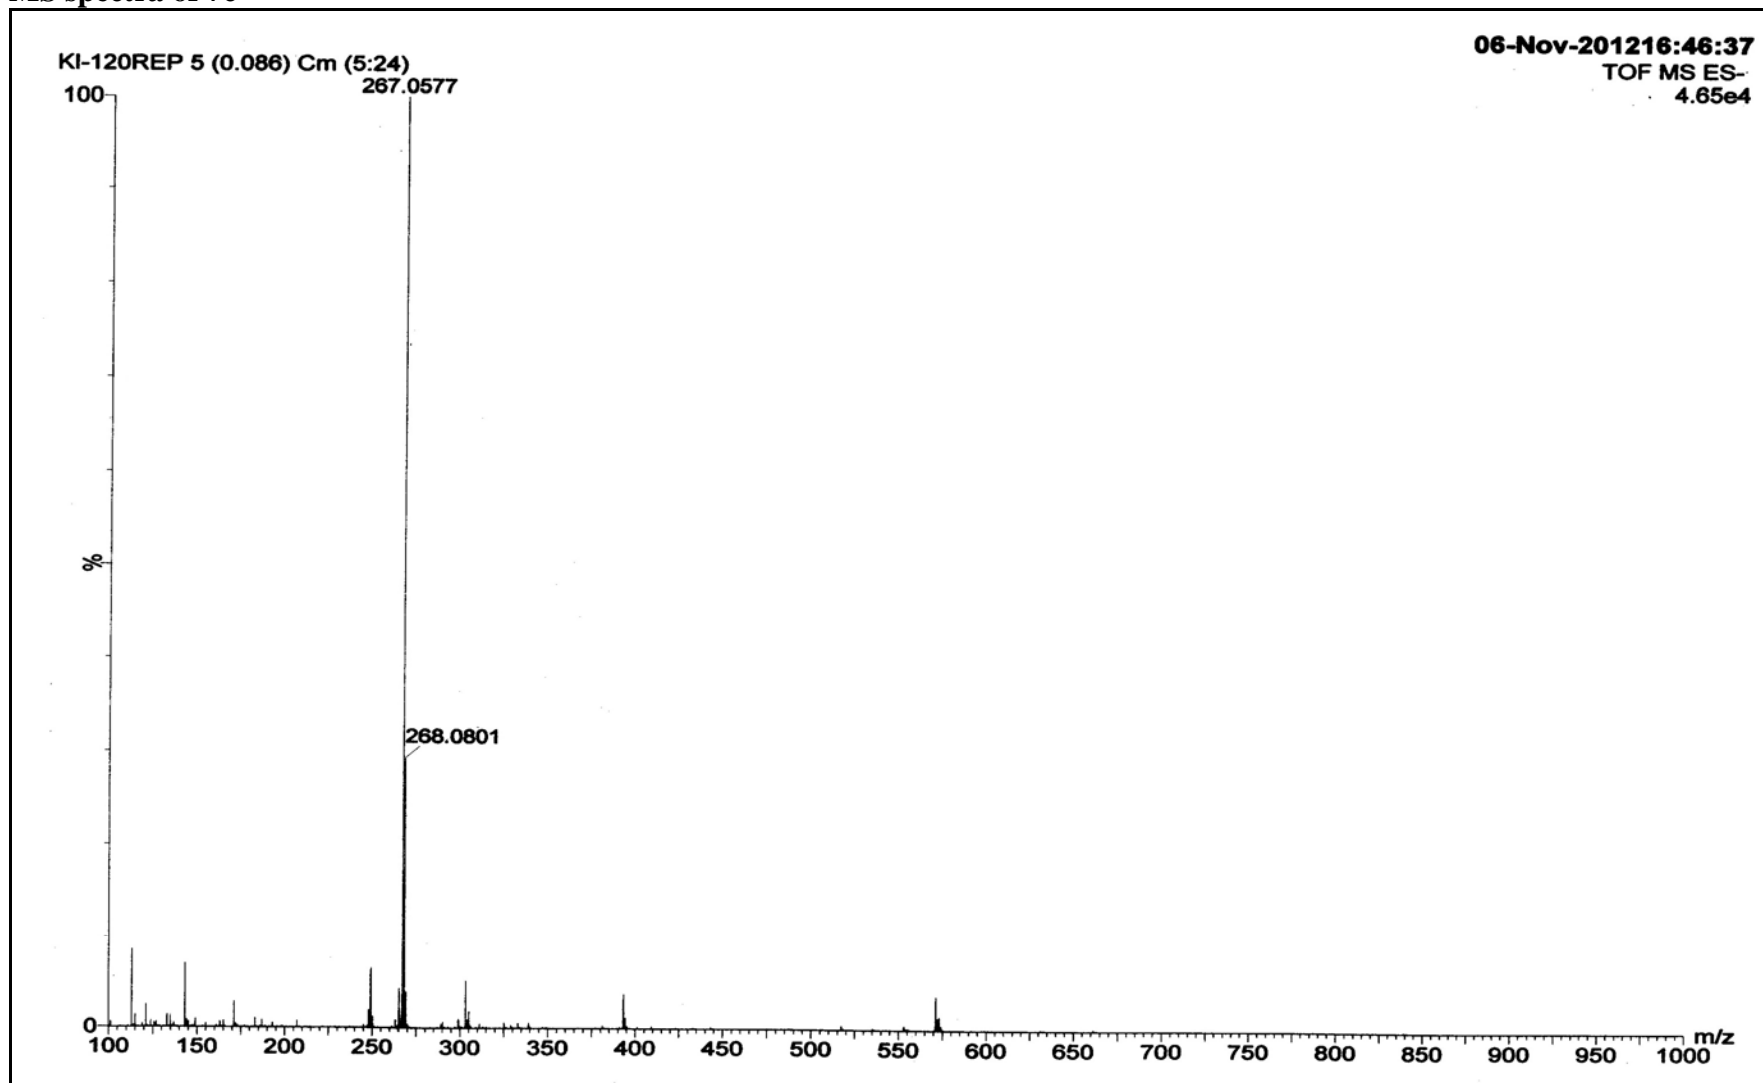

# <sup>1</sup>H NMR spectra of 7d

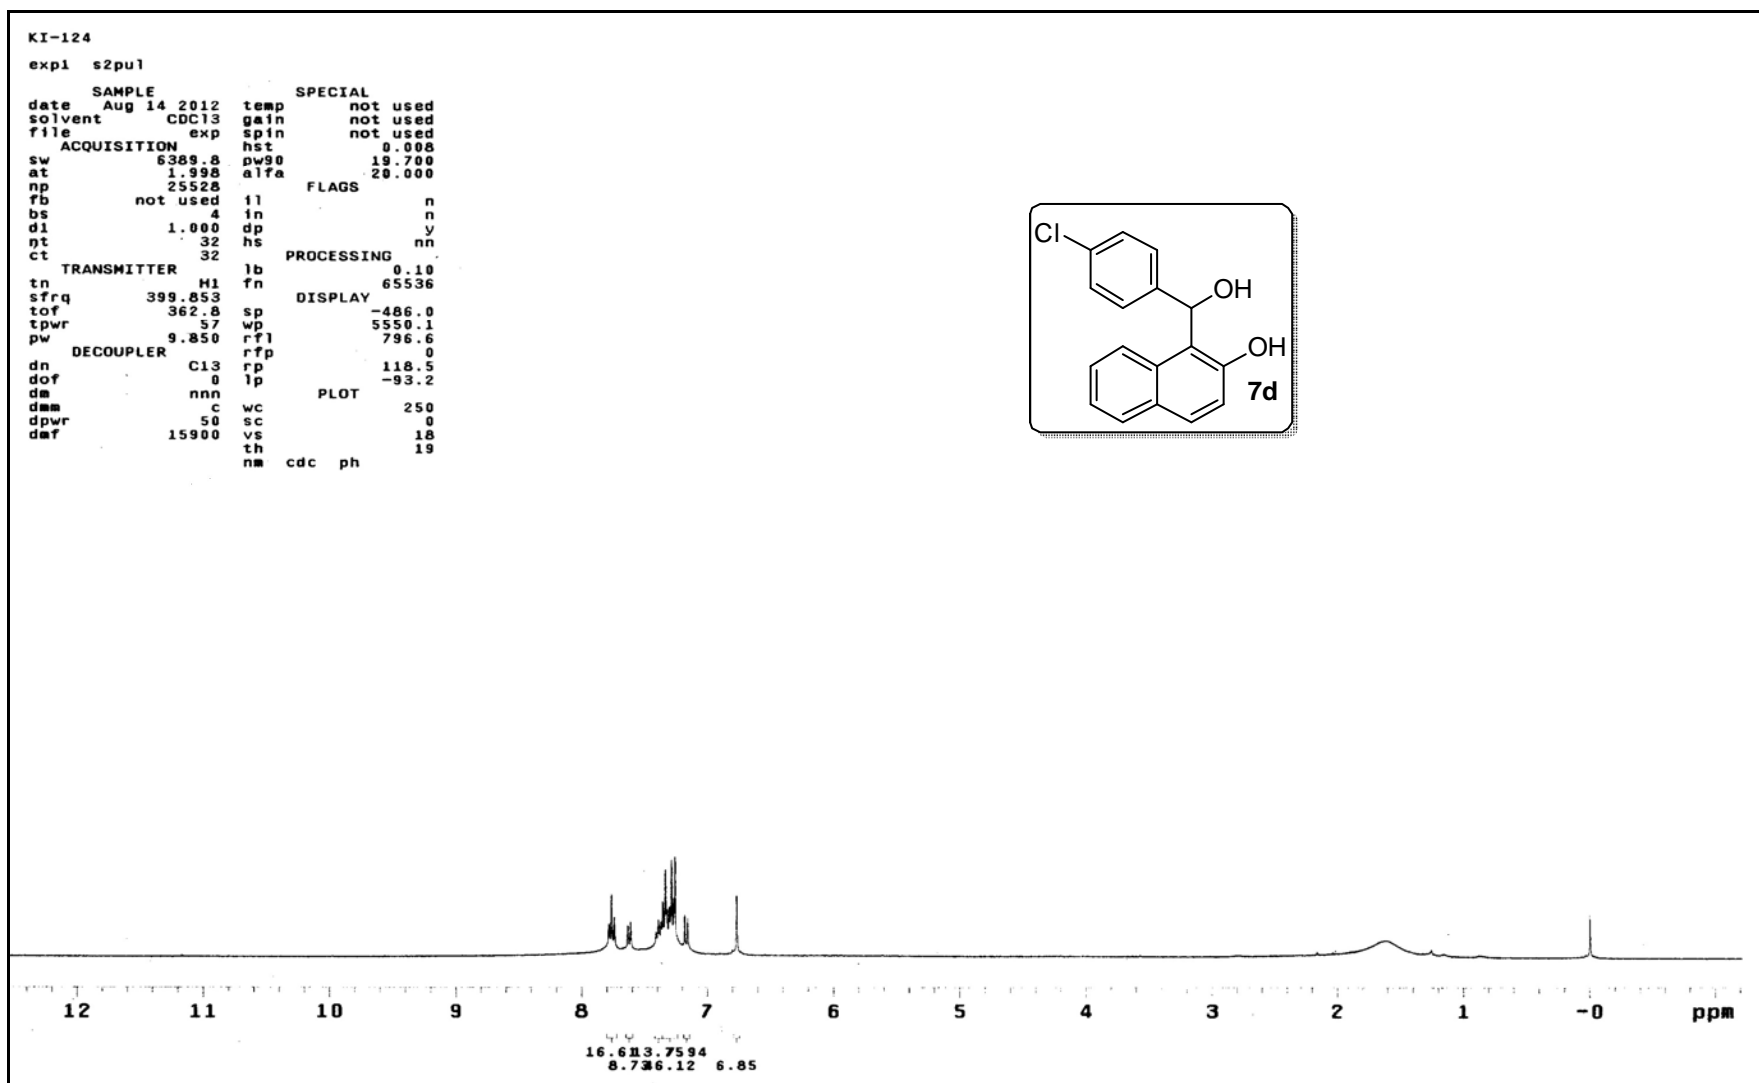

# <sup>13</sup>C NMR spectra of 7d

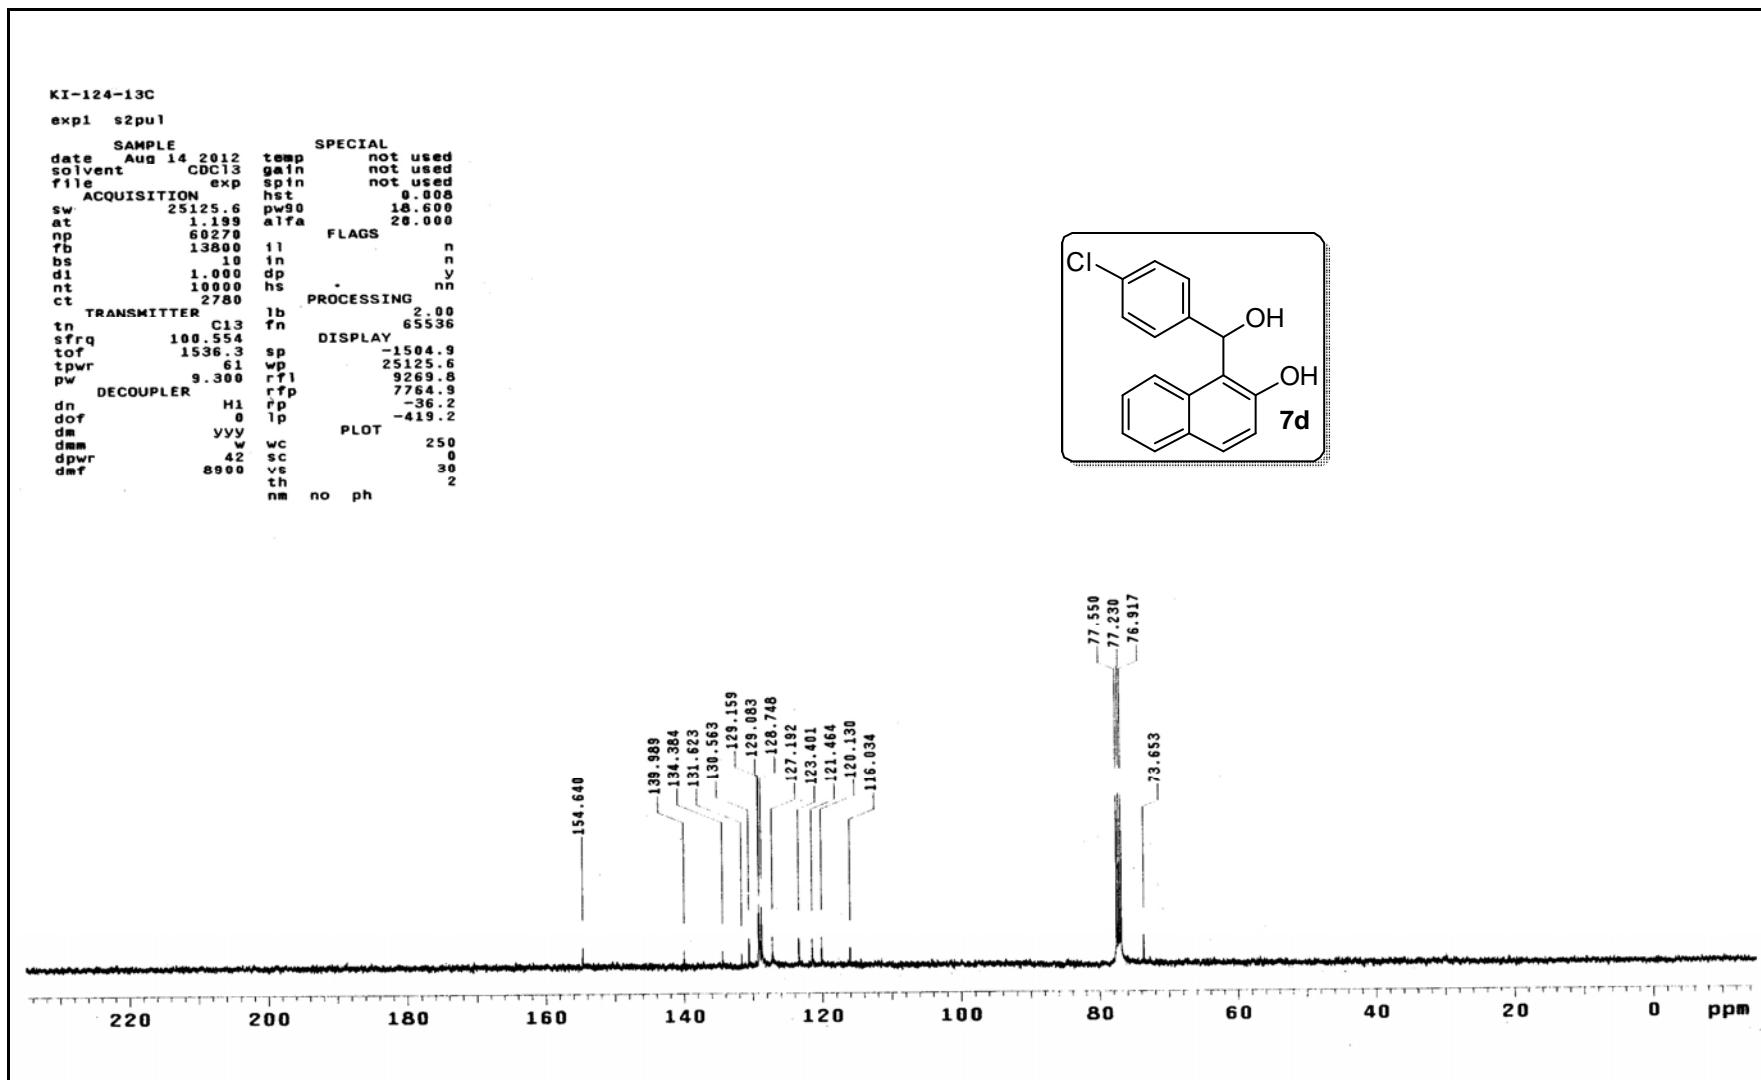

# <sup>1</sup>H NMR spectra of 9

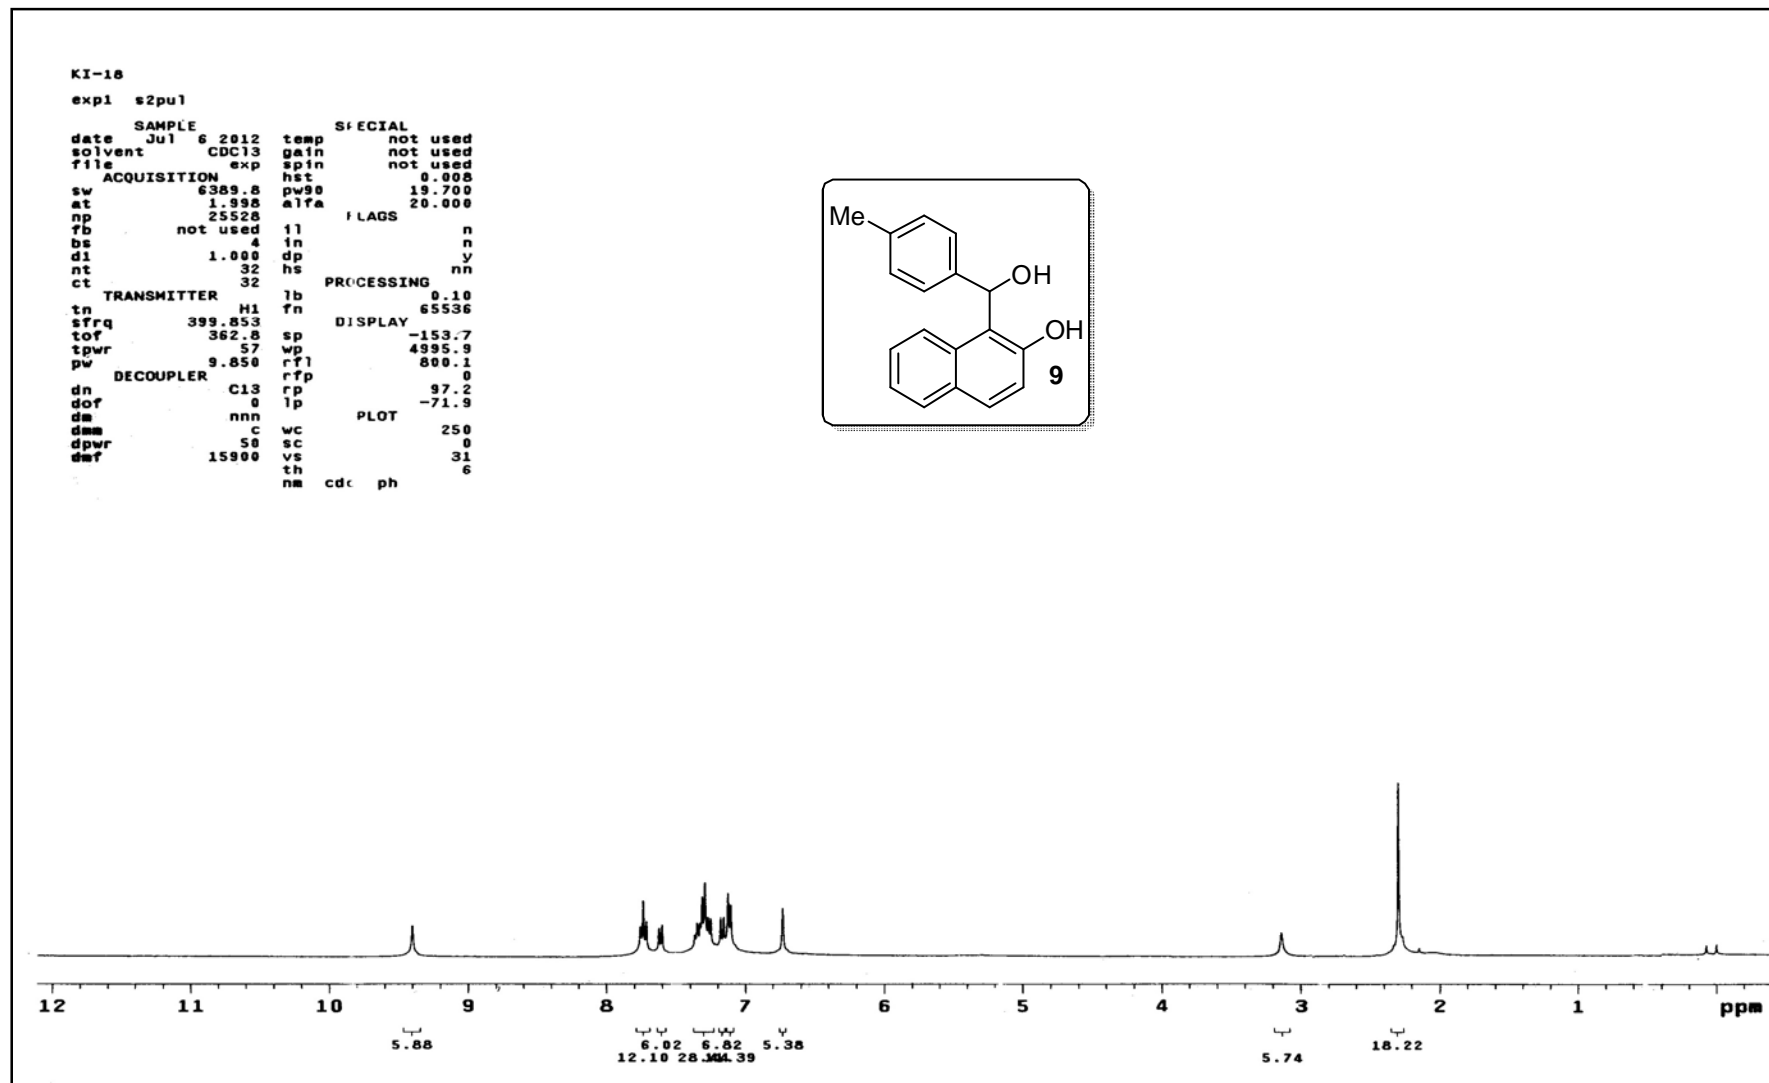

<sup>13</sup>C NMR spectra of 9

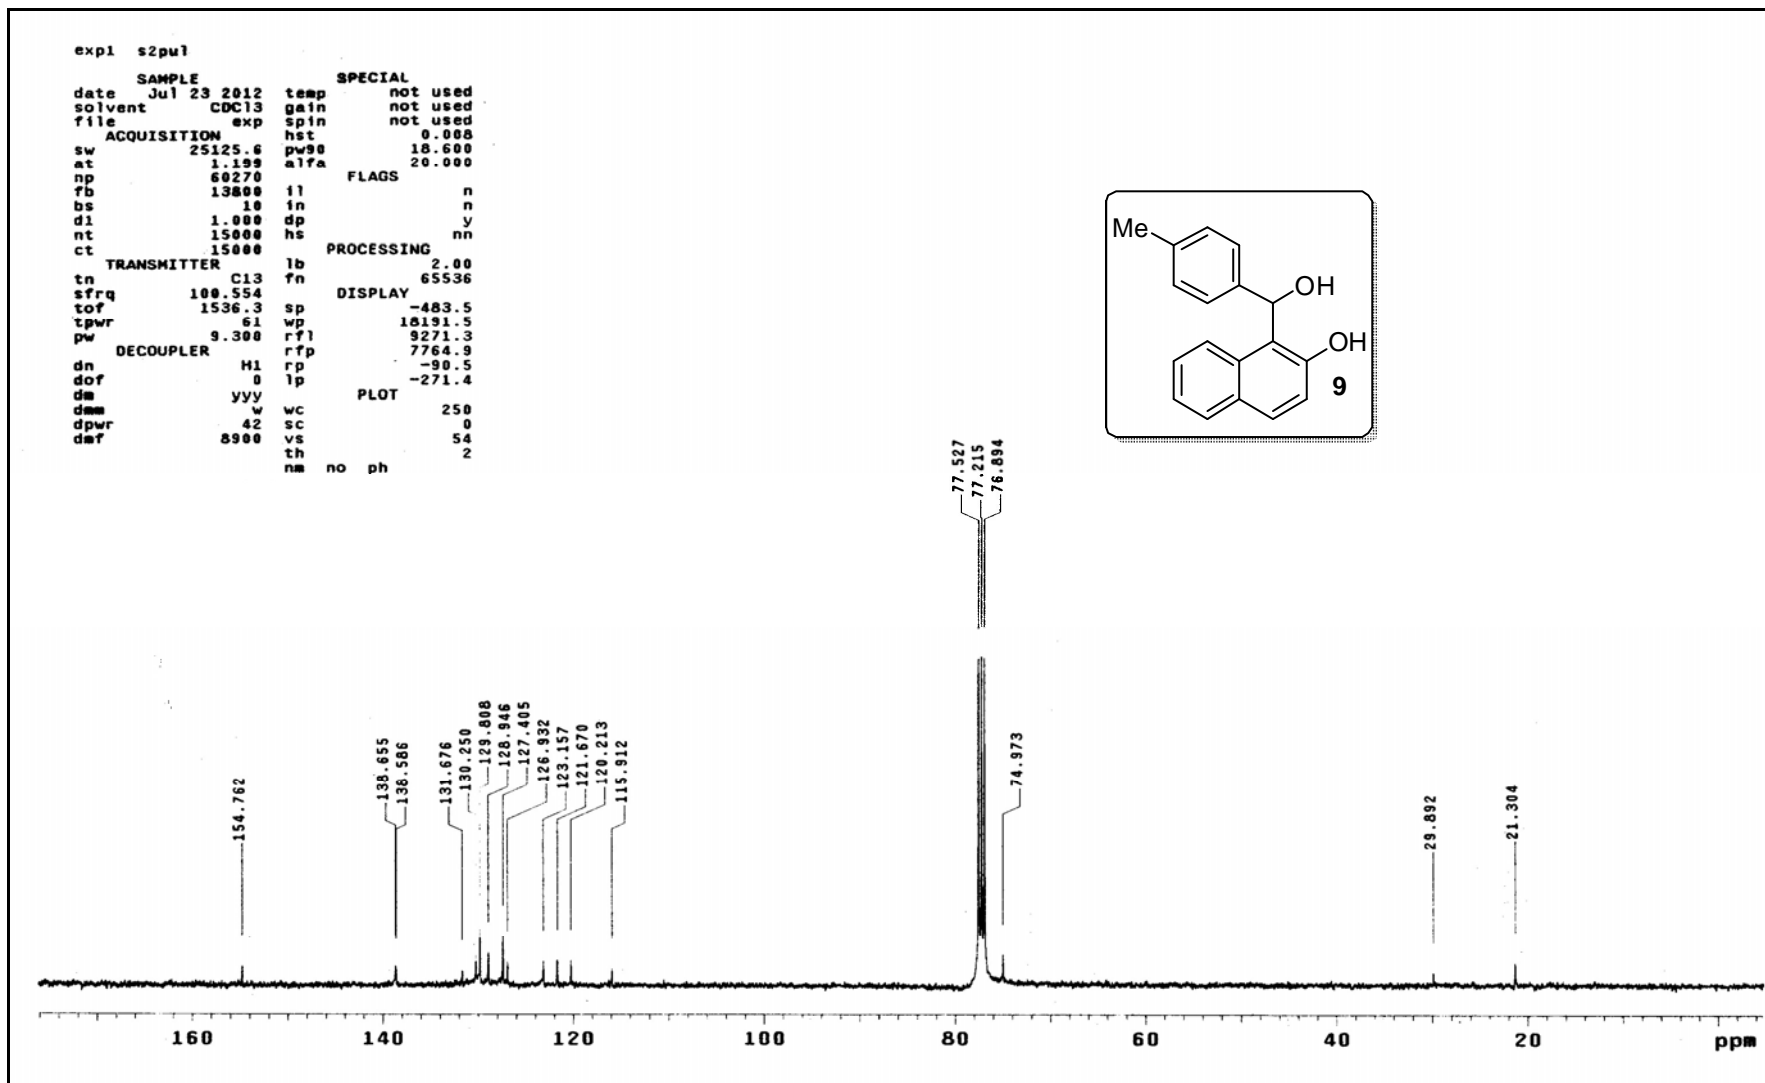

MS spectra of 9

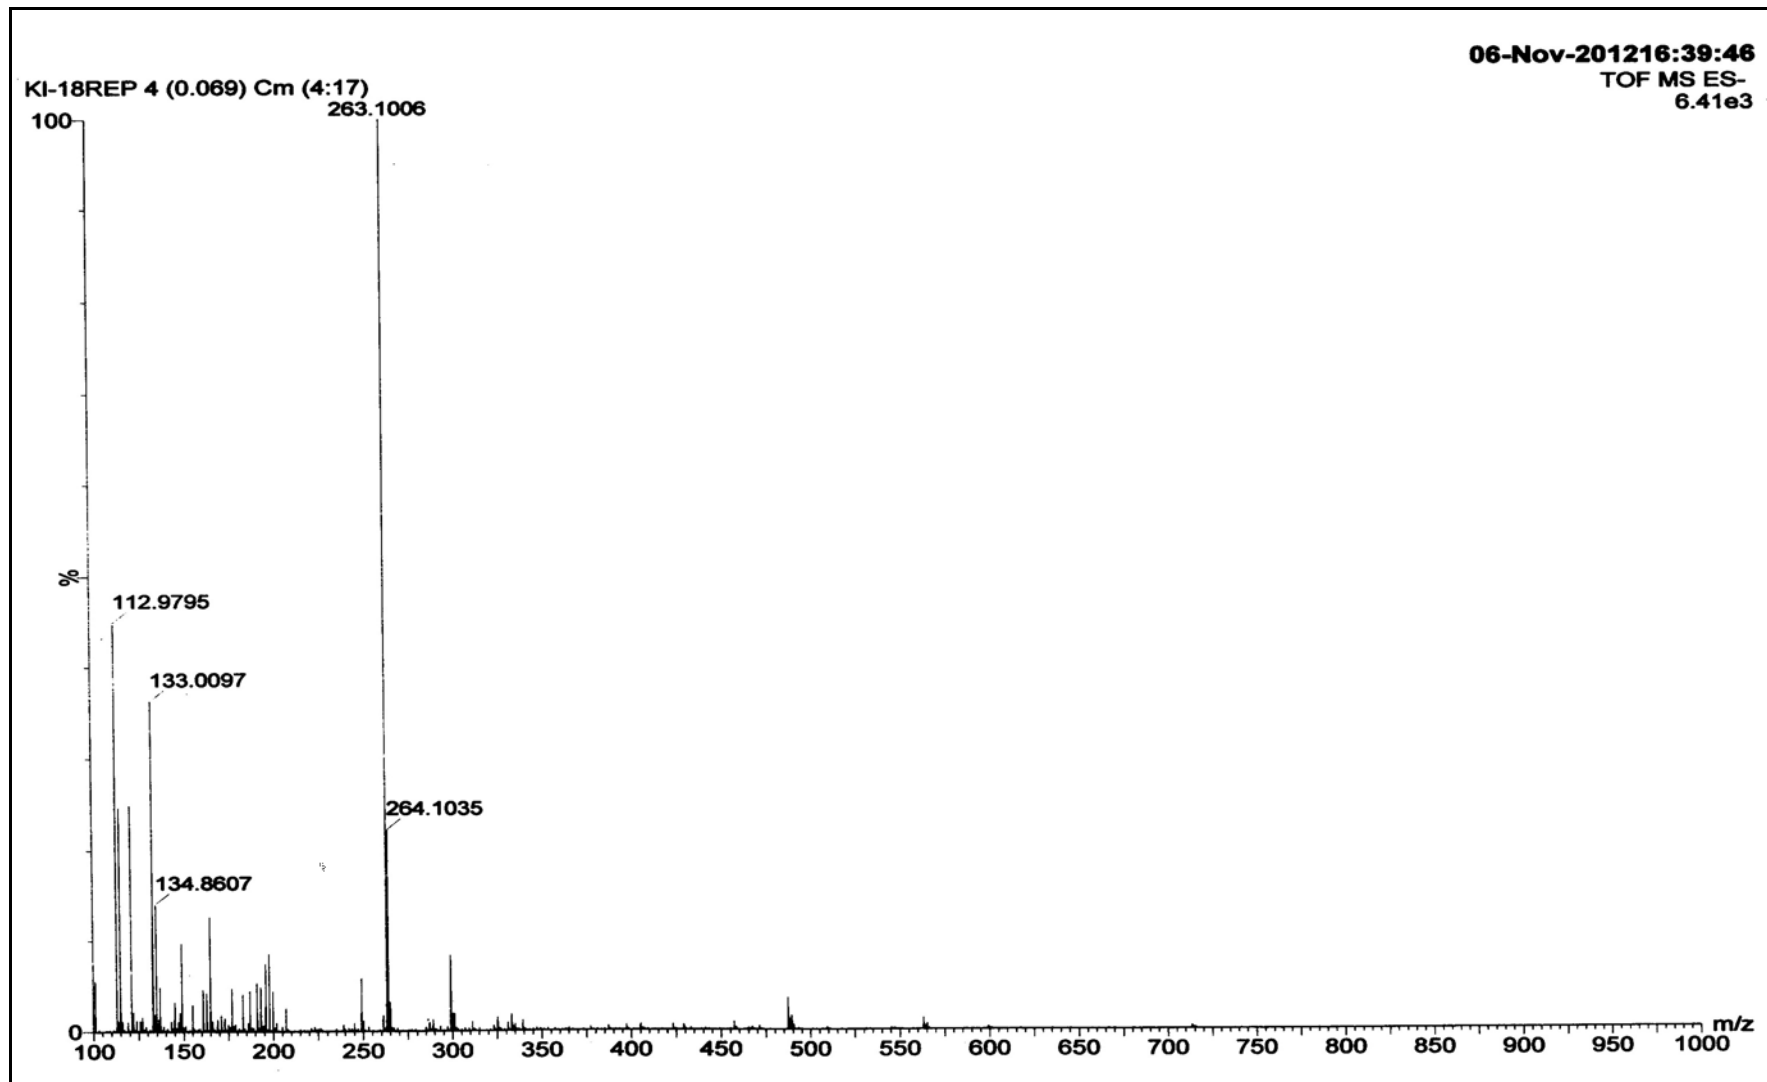

# <sup>1</sup>H NMR spectra of 15

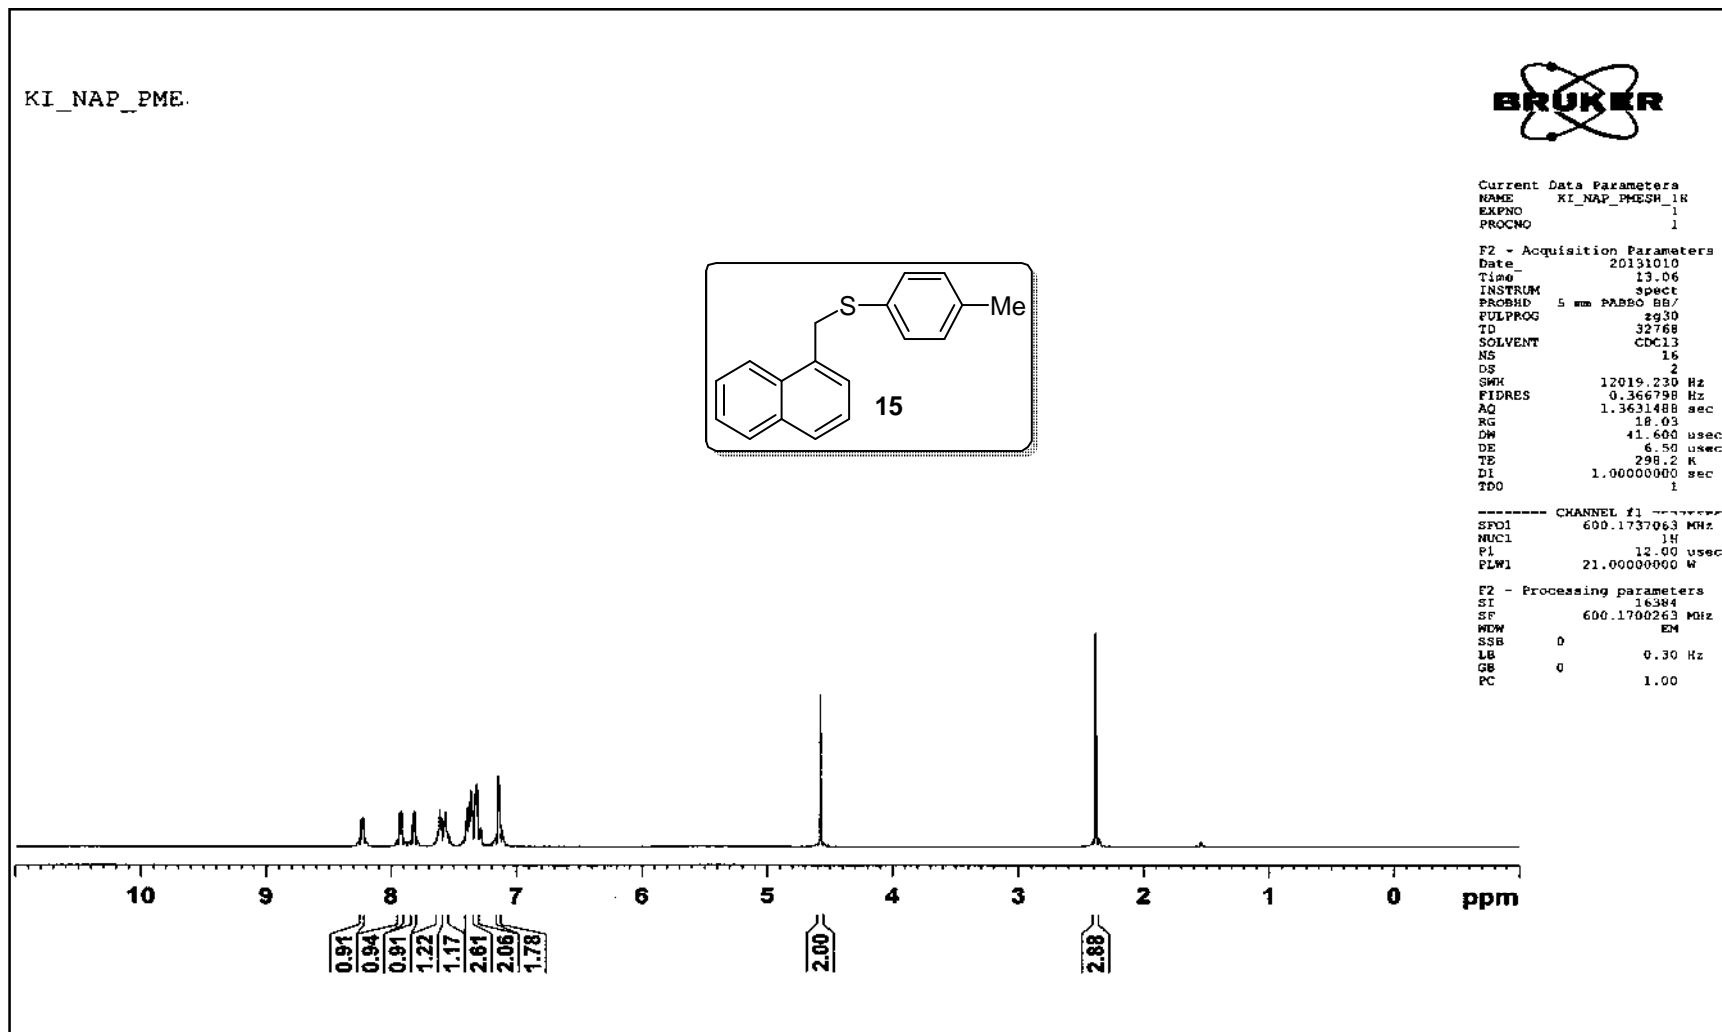



<sup>13</sup>C NMR spectra of 15

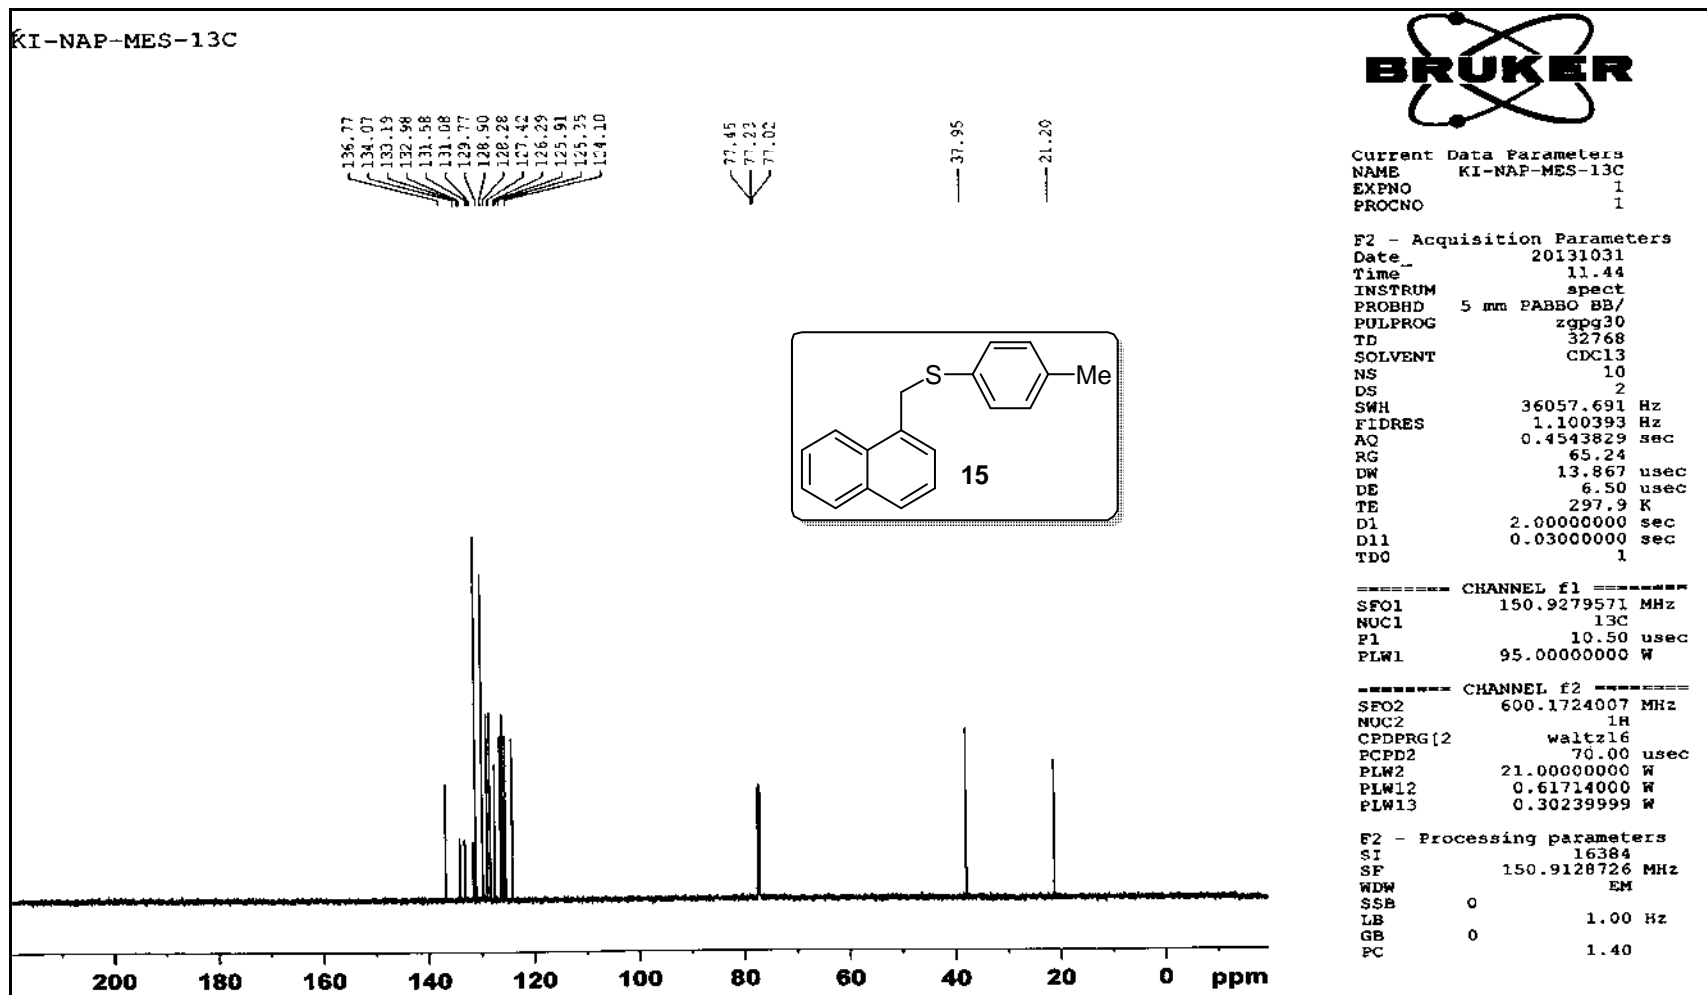

<sup>1</sup>H NMR spectra of 18

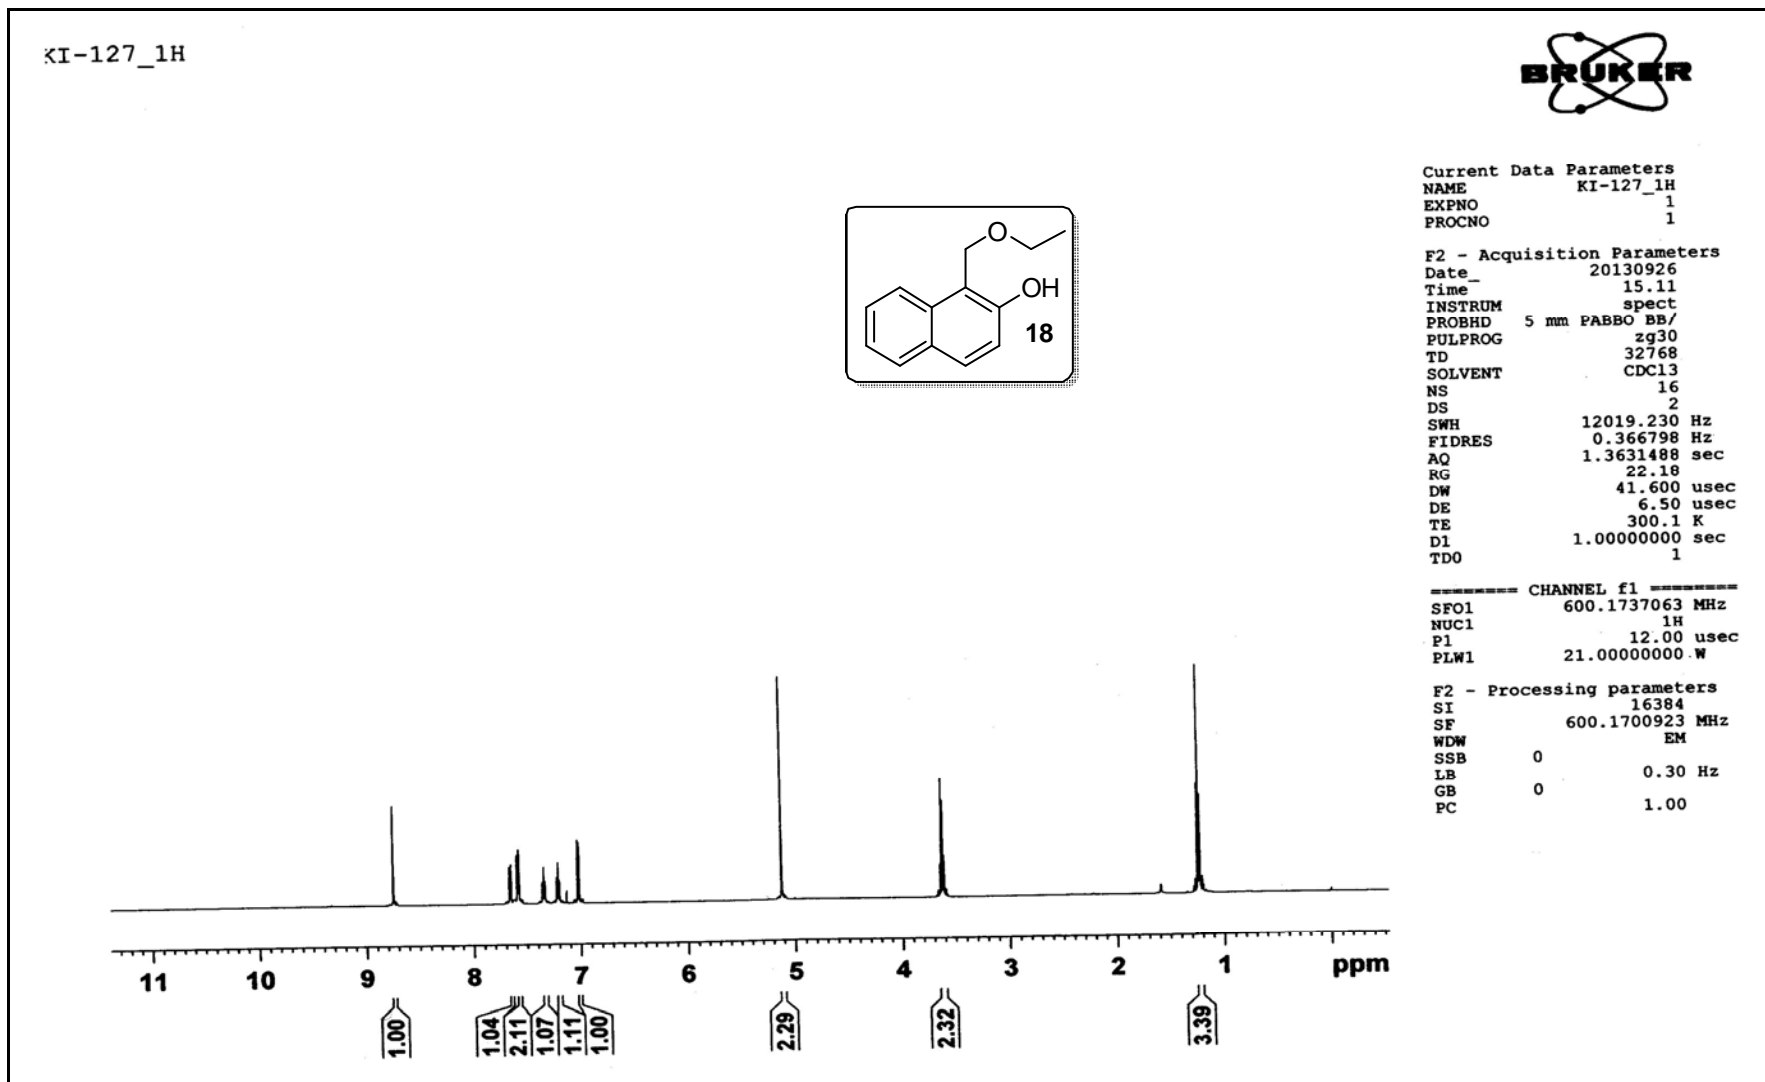

<sup>13</sup>C NMR spectra of 18

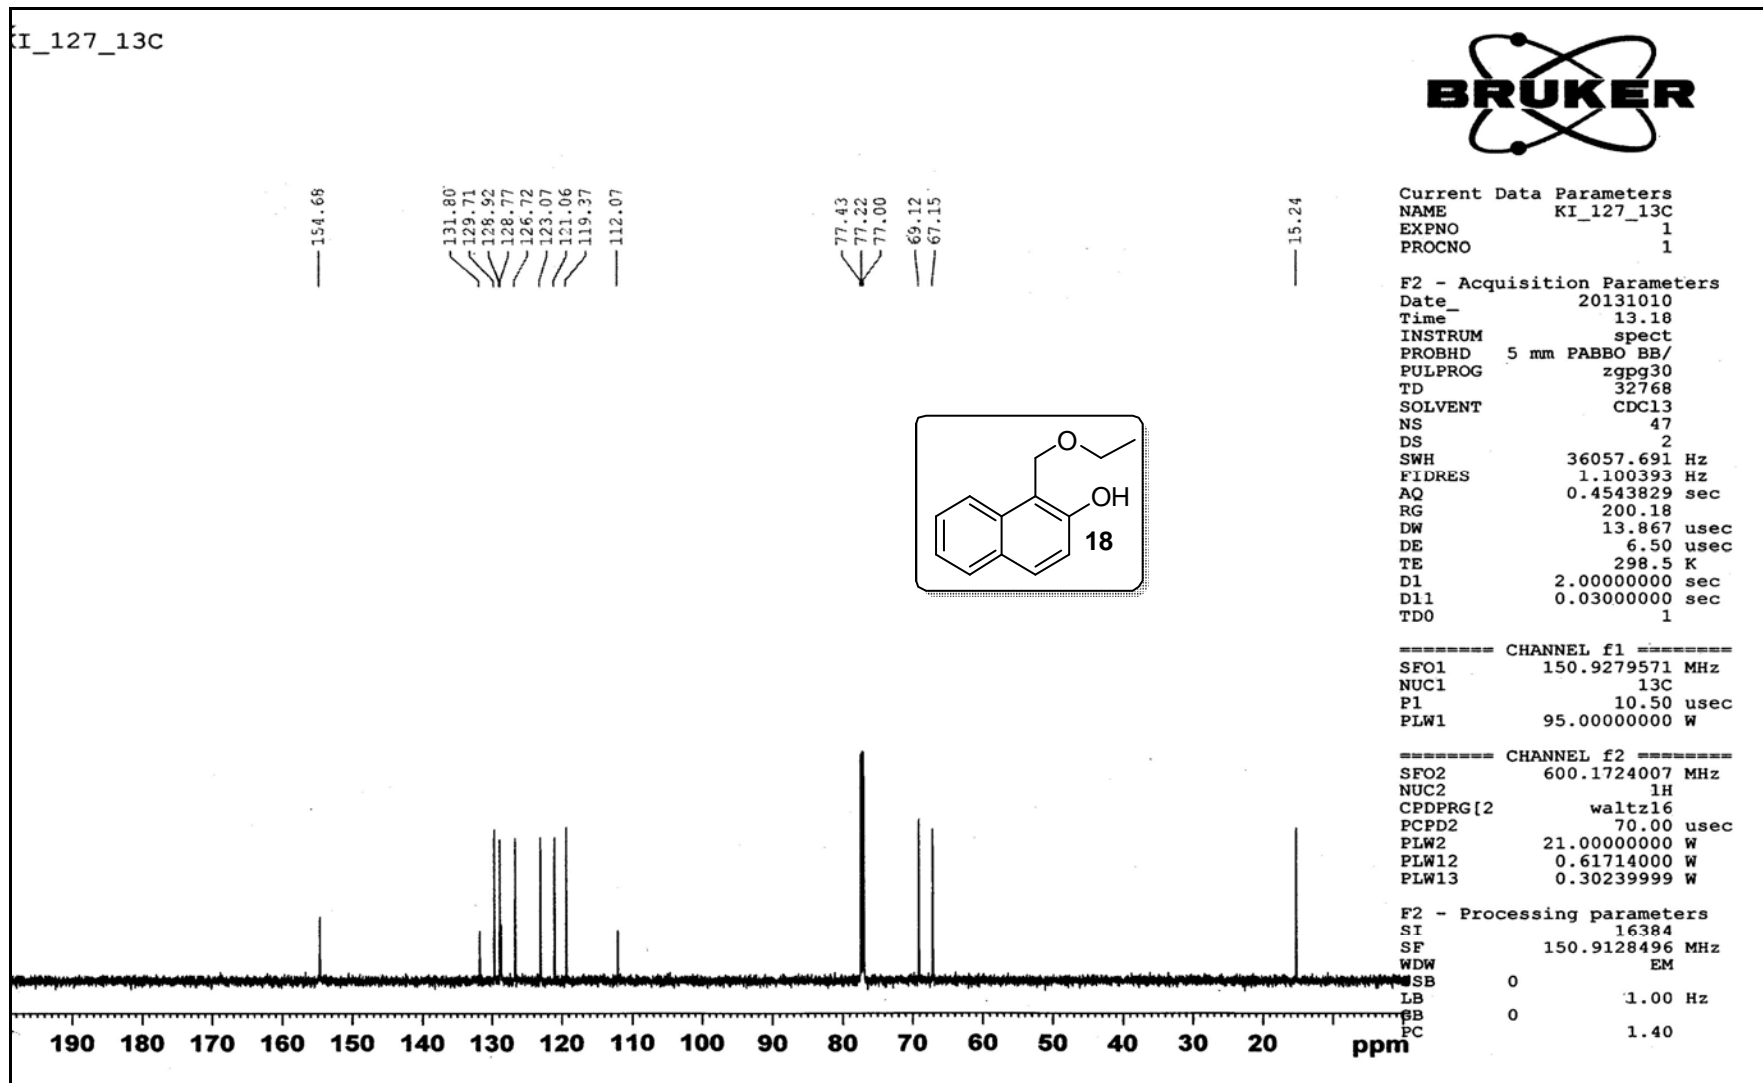

Supplement: c5ra14563e1.pdf [file c5ra14563e1.pdf]
